# Supplementary material for: The Paf1 complex positively regulates enhancer activity in mouse embryonic stem cells
Source: Life Sci Alliance. 2020 Dec 29;4(3):e202000792. doi: 10.26508/lsa.202000792 (PMC7772781; doi:10.26508/lsa.202000792)
Supplement: Supplementary file 1 [file LSA-2020-00792_TableS1.xlsx]

## Sheet: ESC_NIH3T3_overlap
Ctr9 binding site coordinates (mm10)			ESCs	NIH-3T3
chr1	30801424	30802063	+	+
chr1	39976952	39977553	+	-
chr1	52952331	52953432	+	-
chr1	58457907	58458542	+	+
chr1	62783385	62783986	+	-
chr1	63044802	63045950	+	-
chr1	66715494	66716095	+	-
chr1	87424726	87425327	+	-
chr1	87948654	87949689	-	+
chr1	136707551	136708152	+	-
chr1	152829725	152830381	+	+
chr1	161087421	161088022	+	-
chr1	164494921	164495522	+	-
chr1	180879278	180879879	+	-
chr1	181927417	181928018	+	-
chr1	185204453	185205054	-	+
chr1	4866047	4866648	+	-
chr1	4898530	4900076	+	+
chr1	7094225	7094826	+	-
chr1	9666408	9667009	+	-
chr1	10993450	10994051	+	-
chr1	16105342	16105943	-	+
chr1	20807091	20807811	+	+
chr1	30948966	30950375	+	+
chr1	33914311	33914912	-	+
chr1	34110913	34111514	+	-
chr1	34176927	34177528	+	-
chr1	36077113	36077714	+	-
chr1	36322570	36323568	+	+
chr1	36519611	36520212	+	-
chr1	36585215	36585816	+	-
chr1	36798059	36798660	+	-
chr1	38043407	38044607	-	+
chr1	39910929	39911530	+	-
chr1	40009261	40009862	+	-
chr1	40025623	40026797	+	+
chr1	45366892	45367493	-	+
chr1	51477826	51478580	+	+
chr1	52231998	52232611	+	+
chr1	52920306	52920907	+	-
chr1	53313107	53314035	+	-
chr1	55000508	55001109	+	-
chr1	58391851	58392932	-	+
chr1	59669965	59670610	+	+
chr1	59702882	59703830	+	+
chr1	59719307	59719908	+	-
chr1	63504177	63504778	+	-
chr1	65207977	65208578	+	-
chr1	71024307	71024908	+	-
chr1	72154856	72155457	+	-
chr1	72236772	72237373	+	-
chr1	72400370	72400971	+	-
chr1	74268484	74269511	+	+
chr1	74285003	74285604	-	+
chr1	74398734	74399830	-	+
chr1	74431355	74432647	+	+
chr1	74530241	74530842	+	-
chr1	74563562	74564163	+	-
chr1	75169573	75170174	+	-
chr1	75218374	75218975	+	-
chr1	75251541	75252142	-	+
chr1	77397735	77398336	+	-
chr1	78412975	78414502	+	-
chr1	78593712	78594313	+	-
chr1	80264586	80266320	-	+
chr1	82902720	82903684	+	+
chr1	84737572	84738173	+	-
chr1	84754132	84754733	+	-
chr1	84770323	84772384	+	-
chr1	84786708	84787309	+	-
chr1	84819883	84820913	+	-
chr1	86064555	86065156	-	+
chr1	86359582	86361221	+	+
chr1	86441770	86442465	+	+
chr1	86490872	86491473	+	-
chr1	86622111	86623225	-	+
chr1	87228162	87228763	+	-
chr1	87359072	87359993	+	-
chr1	87457583	87458295	+	+
chr1	91373413	91374014	-	+
chr1	91504168	91504769	+	-
chr1	91815568	91816169	-	+
chr1	92438307	92439032	+	+
chr1	92634651	92635252	+	-
chr1	93372296	93372897	+	-
chr1	93404921	93405609	+	+
chr1	93798126	93798727	+	-
chr1	105758690	105759291	-	+
chr1	118685525	118686126	+	-
chr1	118832574	118833175	+	-
chr1	121552233	121553189	+	-
chr1	125386368	125387499	-	+
chr1	127809035	127811827	+	+
chr1	128335294	128335895	+	-
chr1	131038304	131040453	-	+
chr1	131890695	131891296	+	-
chr1	131940110	131940711	-	+
chr1	132464388	132464989	+	-
chr1	133134858	133136943	+	+
chr1	133643078	133644500	+	+
chr1	133660238	133660916	+	+
chr1	134577569	134578641	+	-
chr1	134626597	134627717	+	-
chr1	135380888	135381489	+	-
chr1	136265398	136265999	-	+
chr1	136625919	136626520	+	-
chr1	136723951	136724552	+	-
chr1	150453260	150454419	+	-
chr1	151371754	151372355	-	+
chr1	152862659	152863260	+	-
chr1	152878792	152879393	+	-
chr1	153009828	153010429	+	-
chr1	153239239	153239840	+	-
chr1	159350309	159351312	+	+
chr1	162217623	162218224	-	+
chr1	164265850	164266885	+	-
chr1	165642150	165642751	-	+
chr1	166133471	166134072	+	-
chr1	166149959	166150560	+	-
chr1	167231009	167231610	+	-
chr1	168312309	168312910	-	+
chr1	170884985	170885586	+	-
chr1	171327142	171328161	+	-
chr1	171360005	171360606	+	-
chr1	171409037	171409638	+	-
chr1	172063528	172065094	+	-
chr1	172195622	172196223	+	-
chr1	172211828	172212429	-	+
chr1	178405151	178405752	-	+
chr1	179503071	179503672	+	-
chr1	180600277	180600878	+	-
chr1	180813777	180814472	+	+
chr1	180895664	180896265	+	-
chr1	181092139	181092740	-	+
chr1	181911172	181912289	+	-
chr1	181943778	181945360	+	-
chr1	181976389	181977388	+	-
chr1	182337373	182337974	+	-
chr1	185417206	185417807	+	-
chr1	189873285	189874233	-	+
chr1	193101743	193102344	-	+
chr1	3154016	3154617	+	-
chr1	4770122	4770723	+	-
chr1	4771116	4771717	+	-
chr1	4772078	4772679	+	-
chr1	4773205	4773806	+	-
chr1	4774334	4774935	+	-
chr1	4776760	4777361	+	-
chr1	4777623	4778224	+	-
chr1	4779915	4780516	+	-
chr1	4784189	4784790	+	-
chr1	4814954	4815555	+	-
chr1	4834004	4834605	+	-
chr1	4850064	4850665	+	-
chr1	4851723	4852324	+	-
chr1	4853216	4853817	+	-
chr1	4855633	4856234	+	-
chr1	4858458	4859059	-	+
chr1	4859390	4859991	-	+
chr1	4864319	4864920	+	-
chr1	4897871	4898472	-	+
chr1	4900096	4900799	+	+
chr1	4901146	4902281	-	+
chr1	4903749	4904350	-	+
chr1	4904378	4904979	-	+
chr1	4905152	4906303	+	+
chr1	4906798	4907638	+	+
chr1	4907774	4908375	+	-
chr1	4908867	4909468	-	+
chr1	4909716	4910317	-	+
chr1	4910596	4911197	-	+
chr1	4911548	4912149	-	+
chr1	4912457	4913058	-	+
chr1	5163234	5163835	+	-
chr1	5164136	5164737	+	-
chr1	5165220	5165821	+	-
chr1	5165870	5166471	+	-
chr1	6255839	6256440	-	+
chr1	6257827	6258428	-	+
chr1	7087756	7088357	+	-
chr1	7089555	7090156	+	-
chr1	7096528	7097129	+	-
chr1	7098893	7099494	+	-
chr1	7117932	7118533	+	-
chr1	7125159	7125760	+	-
chr1	7126368	7126969	+	-
chr1	7129207	7129808	+	-
chr1	7135382	7135983	+	-
chr1	7172808	7173409	+	-
chr1	7174978	7175579	+	-
chr1	7481414	7482015	+	-
chr1	7948862	7949463	+	-
chr1	9545624	9546225	-	+
chr1	9547900	9548501	+	-
chr1	9664259	9665260	+	-
chr1	9718946	9719674	+	+
chr1	9937380	9937981	+	-
chr1	9940181	9940801	+	+
chr1	9942659	9943260	-	+
chr1	10022303	10023028	+	+
chr1	10023839	10024440	+	-
chr1	10039716	10040317	+	-
chr1	10125691	10126292	-	+
chr1	10126906	10127507	-	+
chr1	10127995	10128596	-	+
chr1	10129315	10129916	-	+
chr1	10130842	10131443	-	+
chr1	10133528	10134129	-	+
chr1	10134339	10136500	-	+
chr1	10137598	10138199	-	+
chr1	10138286	10138887	-	+
chr1	10162071	10162672	-	+
chr1	10164904	10165505	+	-
chr1	11619739	11620340	+	-
chr1	11620876	11621477	+	-
chr1	11624332	11624933	+	-
chr1	12745024	12745625	+	-
chr1	12835876	12836477	+	-
chr1	12837256	12837857	+	-
chr1	12838989	12839590	+	-
chr1	12862074	12862675	+	-
chr1	12862913	12863514	+	-
chr1	13069299	13069900	+	-
chr1	13070491	13071092	+	-
chr1	13071937	13072538	+	-
chr1	13073669	13074270	+	-
chr1	13075080	13075681	+	-
chr1	13075728	13076329	+	-
chr1	13076665	13077266	+	-
chr1	13078094	13078695	+	-
chr1	13078972	13079573	+	-
chr1	13080633	13081234	+	-
chr1	13083878	13084479	+	-
chr1	13085306	13085907	+	-
chr1	13086357	13086958	+	-
chr1	13093412	13094559	+	-
chr1	13094954	13095555	+	-
chr1	13102824	13103835	+	-
chr1	13104153	13104754	+	-
chr1	13104841	13105442	+	-
chr1	13111802	13112403	+	-
chr1	13135997	13136598	-	+
chr1	13562593	13563194	+	-
chr1	13563480	13564474	+	-
chr1	13621406	13622547	+	-
chr1	13622734	13623335	+	-
chr1	13627287	13627888	+	-
chr1	13628043	13628644	+	-
chr1	13644164	13644765	+	-
chr1	13645890	13646491	+	-
chr1	13659433	13660542	+	+
chr1	15791097	15791698	+	-
chr1	15805653	15806254	+	-
chr1	15806362	15806963	+	-
chr1	15807124	15807725	+	-
chr1	15809451	15810052	+	-
chr1	15811338	15812283	+	-
chr1	15813909	15814510	+	-
chr1	15815204	15815805	+	-
chr1	15822005	15822606	+	-
chr1	15828039	15828640	+	-
chr1	15829118	15829719	+	-
chr1	15831979	15832580	+	-
chr1	15833102	15833703	+	-
chr1	15838090	15838691	+	-
chr1	15846712	15847313	+	-
chr1	15848584	15849441	+	+
chr1	15851257	15852041	+	+
chr1	15853101	15853702	+	-
chr1	15856124	15856725	+	-
chr1	15858821	15859422	+	-
chr1	15860222	15861286	+	+
chr1	16097743	16098344	-	+
chr1	16099000	16099676	+	+
chr1	16101168	16101769	-	+
chr1	16101961	16102562	+	-
chr1	16103057	16103658	+	-
chr1	16558336	16558937	-	+
chr1	16559198	16560334	-	+
chr1	16560912	16561513	-	+
chr1	16561976	16563247	+	+
chr1	16564424	16565192	+	+
chr1	16593972	16594573	+	-
chr1	16618660	16619261	-	+
chr1	16637183	16637784	+	-
chr1	16640037	16640638	+	-
chr1	16641842	16642922	+	+
chr1	16656264	16656865	-	+
chr1	16688292	16688893	-	+
chr1	20792379	20792980	+	-
chr1	20793359	20793960	+	-
chr1	20796122	20796723	-	+
chr1	20797512	20798113	-	+
chr1	20798696	20799297	-	+
chr1	20800826	20801632	+	+
chr1	20801858	20802459	+	-
chr1	20802958	20804147	+	-
chr1	20804743	20805392	+	+
chr1	20805497	20806252	+	+
chr1	20806366	20806967	+	-
chr1	20809732	20810333	+	-
chr1	20811129	20811730	+	-
chr1	20812312	20812913	+	-
chr1	20813149	20813750	+	-
chr1	20813975	20814576	+	-
chr1	20814928	20815529	+	-
chr1	20816668	20817269	+	-
chr1	20817898	20818499	+	-
chr1	20818509	20819110	+	-
chr1	20940332	20940933	+	-
chr1	20996480	20997645	+	-
chr1	21255674	21256275	+	-
chr1	24008849	24009450	-	+
chr1	24766492	24767093	+	-
chr1	30799204	30800129	+	+
chr1	30800577	30801178	-	+
chr1	30802554	30803155	+	-
chr1	30803648	30804249	+	-
chr1	30822383	30822984	+	-
chr1	30823037	30823638	+	-
chr1	30824305	30824906	+	-
chr1	30825667	30826776	+	-
chr1	30830497	30831098	+	-
chr1	30839786	30840849	+	-
chr1	30847149	30847750	+	-
chr1	30849273	30850388	+	-
chr1	30851247	30851848	+	-
chr1	30852437	30853038	+	-
chr1	30872797	30873398	-	+
chr1	30938859	30939460	+	-
chr1	30940351	30941209	+	+
chr1	30941648	30942249	-	+
chr1	30942428	30943029	-	+
chr1	30943075	30943676	-	+
chr1	30943961	30944562	+	-
chr1	30945009	30945610	-	+
chr1	30946610	30947696	+	+
chr1	31680836	31681437	-	+
chr1	31681770	31682371	-	+
chr1	31682421	31683022	-	+
chr1	31683389	31683990	-	+
chr1	31685224	31685825	-	+
chr1	31685943	31686544	-	+
chr1	31688668	31689269	-	+
chr1	31689712	31690313	-	+
chr1	31738051	31738652	-	+
chr1	31739129	31739730	-	+
chr1	31741065	31741666	-	+
chr1	31745081	31745682	-	+
chr1	31749099	31749700	-	+
chr1	31750178	31750779	-	+
chr1	31753179	31753780	-	+
chr1	32378281	32378882	+	-
chr1	33732758	33733359	+	-
chr1	33741623	33742224	+	-
chr1	33742585	33743499	+	+
chr1	33756353	33756954	-	+
chr1	33757293	33758848	+	+
chr1	33759270	33759871	+	-
chr1	33766732	33767333	-	+
chr1	33794103	33794704	+	-
chr1	33908427	33909028	-	+
chr1	34043940	34044541	-	+
chr1	34072986	34073587	+	-
chr1	34074692	34075293	+	-
chr1	34089700	34090301	+	-
chr1	34093416	34094017	+	-
chr1	34096018	34096619	+	-
chr1	34103253	34103854	+	-
chr1	34105180	34105781	+	-
chr1	34105855	34106456	+	-
chr1	34108623	34109224	+	-
chr1	34109790	34110823	+	-
chr1	34111787	34112388	+	-
chr1	34121083	34121684	+	-
chr1	34130065	34130666	+	-
chr1	34131877	34132478	-	+
chr1	34132699	34133300	-	+
chr1	34138352	34138953	+	-
chr1	34140311	34141270	+	+
chr1	34143036	34144030	+	-
chr1	34144450	34145051	+	-
chr1	34145566	34146167	+	-
chr1	34148114	34148715	+	-
chr1	34150328	34150929	-	+
chr1	34152959	34153560	-	+
chr1	34156617	34157218	+	-
chr1	34170999	34171600	+	-
chr1	34174365	34174966	+	-
chr1	34178034	34178635	+	-
chr1	34178751	34179352	+	-
chr1	34179681	34180282	+	-
chr1	34181416	34182017	+	-
chr1	34182460	34183061	+	-
chr1	34184073	34184691	+	+
chr1	34185315	34186284	+	+
chr1	34186557	34187275	+	+
chr1	34187676	34188482	+	+
chr1	34189042	34190434	+	+
chr1	34190868	34191599	+	+
chr1	34193486	34194087	+	-
chr1	34195249	34195850	+	-
chr1	34197046	34197647	+	-
chr1	34200189	34200790	+	-
chr1	34212111	34212712	+	-
chr1	34217250	34217851	+	-
chr1	34222974	34223575	+	-
chr1	34246252	34246853	+	-
chr1	34301322	34301923	+	-
chr1	34302698	34303299	+	-
chr1	34305320	34305921	+	-
chr1	34309167	34309846	+	+
chr1	34309979	34310761	+	+
chr1	34435962	34436563	+	-
chr1	34445219	34446736	+	-
chr1	34448137	34448738	+	-
chr1	34450524	34451125	+	-
chr1	34801709	34802310	-	+
chr1	34805842	34806443	+	-
chr1	34806680	34807281	+	-
chr1	34807572	34808887	+	+
chr1	34809303	34809904	-	+
chr1	34810263	34810864	-	+
chr1	34811628	34812415	+	+
chr1	34813294	34814440	+	-
chr1	34814712	34815313	+	-
chr1	34821907	34822508	+	-
chr1	34824484	34825085	+	-
chr1	34842212	34842813	-	+
chr1	36062488	36063089	+	-
chr1	36075187	36076312	+	-
chr1	36076431	36077032	+	-
chr1	36078556	36079157	+	-
chr1	36079954	36080555	+	-
chr1	36080781	36081382	+	-
chr1	36081848	36082449	+	-
chr1	36083083	36083684	+	-
chr1	36083918	36084519	+	-
chr1	36084837	36085438	+	-
chr1	36086223	36086824	+	-
chr1	36086866	36087467	+	-
chr1	36087959	36088560	+	-
chr1	36088579	36089180	+	-
chr1	36089839	36090440	+	-
chr1	36090489	36091090	+	-
chr1	36094778	36095379	+	-
chr1	36095542	36096143	+	-
chr1	36096808	36097409	+	-
chr1	36098008	36098609	+	-
chr1	36098970	36099571	+	-
chr1	36100637	36101238	+	-
chr1	36102328	36102929	+	-
chr1	36106475	36107076	+	-
chr1	36137897	36138892	+	+
chr1	36139414	36140015	+	-
chr1	36140073	36140674	+	-
chr1	36141068	36141669	+	-
chr1	36315078	36315679	+	-
chr1	36320267	36320868	+	-
chr1	36321325	36322454	+	-
chr1	36323583	36324184	-	+
chr1	36325356	36325957	-	+
chr1	36327405	36328006	-	+
chr1	36332400	36334113	+	+
chr1	36334181	36335201	+	+
chr1	36417327	36418506	+	-
chr1	36419634	36420235	+	-
chr1	36435437	36436038	+	-
chr1	36512774	36513375	+	-
chr1	36518044	36518645	+	-
chr1	36520661	36521262	+	-
chr1	36525656	36526257	+	-
chr1	36526531	36527132	+	-
chr1	36528272	36528873	+	-
chr1	36529866	36530467	+	-
chr1	36530746	36531347	+	-
chr1	36531357	36531958	+	-
chr1	36537509	36538110	+	-
chr1	36554937	36555538	-	+
chr1	36556798	36557399	-	+
chr1	36580065	36580666	+	-
chr1	36583149	36583750	+	-
chr1	36586274	36587214	+	-
chr1	36587536	36588137	+	-
chr1	36588182	36588783	+	-
chr1	36589986	36590587	+	-
chr1	36640938	36641539	+	-
chr1	36642023	36642624	+	-
chr1	36665200	36666257	+	-
chr1	36694866	36696114	+	+
chr1	36696152	36696753	+	-
chr1	36698236	36698837	+	-
chr1	36786650	36787251	+	-
chr1	36787466	36788067	+	-
chr1	36789666	36790267	+	-
chr1	36791533	36792134	+	-
chr1	36794217	36794818	+	-
chr1	36795677	36796278	+	-
chr1	36796599	36797200	+	-
chr1	36799616	36800217	+	-
chr1	36801275	36801876	+	-
chr1	36803633	36804234	+	-
chr1	36804710	36805311	+	-
chr1	36805554	36806644	+	-
chr1	36820344	36820945	+	-
chr1	36821072	36821673	+	-
chr1	36824861	36825462	+	-
chr1	36836037	36836638	+	-
chr1	36842993	36844108	+	-
chr1	36858660	36859261	+	-
chr1	36861437	36862038	+	-
chr1	36864407	36865008	+	-
chr1	36872670	36873271	+	-
chr1	36879770	36880371	+	-
chr1	36881060	36881661	+	-
chr1	36881745	36882346	+	-
chr1	36884404	36885005	+	-
chr1	36938345	36938946	+	-
chr1	36939455	36940056	+	-
chr1	36983266	36983867	+	-
chr1	36985218	36985819	+	-
chr1	36986384	36986985	+	-
chr1	37101037	37101638	+	-
chr1	37133283	37133884	+	-
chr1	37147006	37147607	+	-
chr1	37415741	37416342	+	-
chr1	37416517	37417630	+	-
chr1	37418880	37419481	+	-
chr1	37436348	37436949	+	-
chr1	37437540	37438141	+	-
chr1	37439738	37440339	+	-
chr1	37441140	37441741	+	-
chr1	37875504	37876105	+	-
chr1	37876816	37878016	+	-
chr1	37900043	37900644	+	-
chr1	37982037	37982638	-	+
chr1	37982657	37983258	+	-
chr1	37983440	37984041	-	+
chr1	37984158	37984759	+	-
chr1	37984792	37985393	+	-
chr1	37985583	37986184	+	-
chr1	37996332	37996933	-	+
chr1	38024653	38025254	+	-
chr1	38042406	38043007	-	+
chr1	38045891	38046492	+	-
chr1	38046935	38047925	+	+
chr1	38047961	38049989	+	+
chr1	38050049	38050738	+	+
chr1	38051213	38052518	+	+
chr1	38052805	38053457	+	+
chr1	38053607	38054367	+	+
chr1	38054587	38055365	+	+
chr1	38056028	38056629	+	-
chr1	38057966	38059744	+	+
chr1	38082370	38082971	-	+
chr1	38128355	38128956	-	+
chr1	38998077	38998678	+	-
chr1	39367760	39368361	-	+
chr1	39368984	39369585	-	+
chr1	39373269	39373870	+	-
chr1	39374773	39375374	-	+
chr1	39377378	39378468	+	-
chr1	39378896	39379497	+	-
chr1	39543080	39543681	+	-
chr1	39544038	39544639	+	-
chr1	39544949	39545975	+	+
chr1	39546109	39546854	+	+
chr1	39548330	39549455	+	+
chr1	39575401	39576002	-	+
chr1	39576254	39577396	-	+
chr1	39654414	39655015	+	-
chr1	39665838	39666439	+	-
chr1	39901226	39901827	-	+
chr1	39902998	39904273	+	+
chr1	39904362	39904963	-	+
chr1	39905329	39905930	-	+
chr1	39906117	39906718	+	-
chr1	39913750	39914351	+	-
chr1	39915103	39915704	+	-
chr1	39923225	39923826	+	-
chr1	39925326	39925927	+	-
chr1	39935525	39936126	+	-
chr1	39948217	39948818	-	+
chr1	39958971	39959572	-	+
chr1	39961940	39962541	-	+
chr1	39962994	39963893	-	+
chr1	39964436	39965037	-	+
chr1	39965367	39965968	-	+
chr1	39967479	39968080	-	+
chr1	39969492	39970093	-	+
chr1	39970474	39971075	-	+
chr1	39971164	39971765	-	+
chr1	39972258	39973403	-	+
chr1	39974471	39975553	-	+
chr1	39976264	39976865	-	+
chr1	39977740	39978341	-	+
chr1	39980356	39981509	-	+
chr1	39981651	39982252	-	+
chr1	39982592	39983235	+	+
chr1	39986234	39986835	-	+
chr1	39986846	39987447	+	-
chr1	39987743	39988344	-	+
chr1	39989209	39989810	-	+
chr1	39989932	39990533	+	-
chr1	39991543	39993011	+	+
chr1	39993835	39994436	+	-
chr1	39995915	39996516	-	+
chr1	39998396	39998997	-	+
chr1	40001428	40002029	-	+
chr1	40003298	40003899	-	+
chr1	40006173	40006774	+	-
chr1	40007166	40007767	-	+
chr1	40010512	40011113	-	+
chr1	40013600	40015236	-	+
chr1	40016903	40017504	-	+
chr1	40017996	40018597	-	+
chr1	40023394	40023995	-	+
chr1	40027088	40027955	+	+
chr1	40028268	40028869	+	-
chr1	40029935	40031337	+	+
chr1	40033439	40034040	-	+
chr1	40035351	40036351	-	+
chr1	40037505	40038106	-	+
chr1	40266476	40267077	-	+
chr1	40280392	40280993	-	+
chr1	40296002	40296603	-	+
chr1	40297221	40297822	-	+
chr1	40298788	40299389	-	+
chr1	40299858	40300459	-	+
chr1	40300557	40301158	-	+
chr1	40301356	40301957	-	+
chr1	40303156	40303757	-	+
chr1	40309902	40310503	-	+
chr1	40310940	40311541	-	+
chr1	40313737	40314338	-	+
chr1	40315100	40316026	-	+
chr1	40316134	40316735	-	+
chr1	40317457	40318058	-	+
chr1	40442191	40442792	-	+
chr1	40448797	40449398	-	+
chr1	40457887	40458488	-	+
chr1	40458717	40459318	-	+
chr1	40459788	40460389	-	+
chr1	40460937	40462026	-	+
chr1	40462589	40463190	-	+
chr1	40463611	40464212	-	+
chr1	40464321	40465512	-	+
chr1	40465537	40466138	-	+
chr1	42907217	42907818	+	-
chr1	42907921	42908522	+	-
chr1	42908566	42909167	+	-
chr1	43047771	43048372	+	-
chr1	43092396	43092997	+	-
chr1	43115082	43115683	-	+
chr1	43117301	43117902	+	-
chr1	43118206	43118902	+	+
chr1	43120794	43121668	-	+
chr1	43127915	43128516	-	+
chr1	43571118	43571719	+	-
chr1	43934394	43934995	-	+
chr1	43935167	43935768	-	+
chr1	43936129	43936730	-	+
chr1	43959201	43959802	-	+
chr1	44004177	44004778	-	+
chr1	44009824	44011283	+	+
chr1	44011767	44013842	+	+
chr1	44014140	44015159	+	-
chr1	44015456	44016057	+	-
chr1	44016624	44017634	-	+
chr1	44018727	44019328	-	+
chr1	44019517	44020118	-	+
chr1	44020237	44020838	-	+
chr1	44083843	44084444	+	-
chr1	44084485	44085086	+	-
chr1	44103194	44103795	+	-
chr1	44164833	44165434	+	-
chr1	44182689	44183290	+	-
chr1	44821061	44821662	+	-
chr1	44821724	44822325	+	-
chr1	44825799	44826400	+	-
chr1	45361344	45361945	-	+
chr1	45365261	45365862	-	+
chr1	45472253	45472854	-	+
chr1	45814789	45815390	-	+
chr1	45815449	45816109	+	+
chr1	45824170	45825178	-	+
chr1	45825244	45825845	+	-
chr1	45826088	45826689	+	-
chr1	45826928	45827529	+	-
chr1	46852679	46853422	+	+
chr1	50637478	50638079	+	-
chr1	50638964	50639565	+	-
chr1	51463743	51464344	+	-
chr1	51464598	51465199	+	-
chr1	51466439	51467040	+	-
chr1	51468988	51469589	+	-
chr1	51469747	51470348	+	-
chr1	51471477	51472078	+	-
chr1	51473347	51473948	+	-
chr1	51474139	51475082	+	-
chr1	51475344	51476366	+	-
chr1	51476736	51477337	-	+
chr1	51478853	51479454	+	-
chr1	51479797	51480398	+	-
chr1	51622778	51623379	+	-
chr1	51623423	51624024	+	-
chr1	51728318	51729461	+	-
chr1	51730000	51730601	+	-
chr1	51731537	51732602	+	-
chr1	51733742	51734343	+	-
chr1	51735475	51736076	+	-
chr1	51741238	51741839	+	-
chr1	51742915	51743516	+	-
chr1	51747253	51747854	+	-
chr1	51915439	51916040	-	+
chr1	52161602	52162203	-	+
chr1	52166860	52167461	-	+
chr1	52167519	52169206	+	+
chr1	52169337	52169938	+	-
chr1	52170627	52171576	+	+
chr1	52172548	52173662	+	+
chr1	52174068	52174669	+	-
chr1	52176275	52176880	+	+
chr1	52178605	52179733	+	+
chr1	52179881	52180695	+	+
chr1	52181790	52182847	-	+
chr1	52184445	52185046	-	+
chr1	52185794	52186395	-	+
chr1	52190250	52190851	-	+
chr1	52194898	52195499	-	+
chr1	52196117	52196718	-	+
chr1	52196853	52198006	+	+
chr1	52208932	52209533	-	+
chr1	52209677	52210278	-	+
chr1	52227601	52228202	-	+
chr1	52230519	52231120	-	+
chr1	52232716	52233317	-	+
chr1	52453837	52454438	-	+
chr1	52633794	52634395	+	-
chr1	52652619	52653220	+	-
chr1	52915478	52916079	+	-
chr1	52916405	52917006	+	-
chr1	52918533	52919134	+	-
chr1	52919307	52919908	+	-
chr1	52922571	52923172	+	-
chr1	52925092	52925693	+	-
chr1	52949665	52950266	+	-
chr1	52951003	52951604	+	-
chr1	53312091	53312692	+	-
chr1	53319306	53319907	+	-
chr1	53753769	53754370	+	-
chr1	53783964	53784565	-	+
chr1	53784636	53785237	-	+
chr1	54044623	54045224	-	+
chr1	54395080	54395681	+	-
chr1	54978316	54979288	+	+
chr1	54979517	54980217	+	+
chr1	54980279	54981448	+	+
chr1	54981697	54982298	-	+
chr1	54982955	54983556	-	+
chr1	54984074	54984675	+	-
chr1	54985148	54986727	+	+
chr1	54987719	54988320	-	+
chr1	54988865	54989645	+	+
chr1	54989665	54990266	-	+
chr1	54990810	54992325	+	+
chr1	54992736	54994016	+	+
chr1	54997152	54997753	+	-
chr1	54998540	54999141	-	+
chr1	54999798	55000399	+	-
chr1	55002090	55003254	-	+
chr1	55003945	55004968	+	+
chr1	55006847	55007448	+	-
chr1	55007736	55009222	+	+
chr1	55012354	55013346	+	+
chr1	55015233	55015834	+	-
chr1	55016295	55017140	+	+
chr1	55019489	55020382	+	+
chr1	55020556	55021157	-	+
chr1	55022716	55023396	+	+
chr1	55024022	55024957	-	+
chr1	55025363	55025964	-	+
chr1	55025991	55027214	+	+
chr1	55027763	55028364	+	-
chr1	55053530	55054131	-	+
chr1	55073059	55073660	-	+
chr1	55076761	55077589	+	+
chr1	55077956	55078557	+	-
chr1	55079370	55079971	+	-
chr1	55080641	55081242	+	-
chr1	55081445	55082156	+	+
chr1	55083124	55083725	+	-
chr1	55084734	55085891	+	-
chr1	55086900	55087955	+	+
chr1	55088743	55089968	+	+
chr1	55089980	55090581	+	-
chr1	55091882	55092483	+	-
chr1	55093514	55094115	+	-
chr1	55138114	55138715	+	-
chr1	55155821	55156422	+	-
chr1	55157002	55158507	+	+
chr1	55159860	55160461	+	-
chr1	55160800	55161401	+	-
chr1	55161727	55162328	-	+
chr1	56970681	56971282	+	-
chr1	56972580	56973181	-	+
chr1	57384672	57385273	+	-
chr1	57385596	57386197	+	-
chr1	57416705	57417306	+	-
chr1	57954053	57954654	+	-
chr1	58005813	58006991	+	-
chr1	58007962	58008563	+	-
chr1	58017102	58018134	+	-
chr1	58027081	58027682	+	-
chr1	58027773	58028374	+	-
chr1	58029488	58030089	+	-
chr1	58381320	58381921	+	-
chr1	58382385	58382986	+	-
chr1	58391116	58391717	-	+
chr1	58393487	58394331	+	+
chr1	58394935	58395536	-	+
chr1	58396209	58396810	+	-
chr1	58399035	58399636	-	+
chr1	58401224	58401825	+	-
chr1	58402406	58403007	+	-
chr1	58404059	58404660	+	-
chr1	58405648	58406249	+	-
chr1	58408177	58408778	-	+
chr1	58409422	58410023	+	-
chr1	58412246	58412867	+	+
chr1	58413221	58414278	+	+
chr1	58414330	58415054	+	+
chr1	58415154	58415841	+	+
chr1	58416015	58416616	-	+
chr1	58416857	58417458	-	+
chr1	58418016	58418617	-	+
chr1	58420235	58420836	-	+
chr1	58421526	58422127	+	-
chr1	58422485	58423086	-	+
chr1	58423319	58423920	+	-
chr1	58427157	58427758	+	-
chr1	58428028	58428629	+	-
chr1	58435623	58436224	+	-
chr1	58437118	58437719	+	-
chr1	58456342	58457802	-	+
chr1	58460068	58461456	+	+
chr1	58462839	58464023	+	-
chr1	58520327	58520928	+	-
chr1	58596254	58597321	+	-
chr1	58597739	58598340	+	-
chr1	58598798	58599399	+	-
chr1	58651824	58652425	-	+
chr1	58652527	58653128	-	+
chr1	58711408	58712009	-	+
chr1	58713417	58714018	-	+
chr1	58714172	58714773	-	+
chr1	58716836	58717437	+	-
chr1	58718322	58718923	+	-
chr1	58720384	58720985	+	-
chr1	58721436	58722037	+	-
chr1	58723873	58724474	+	-
chr1	58725431	58726032	+	-
chr1	58761509	58762110	-	+
chr1	59160141	59160742	+	-
chr1	59161446	59162047	+	-
chr1	59483107	59483708	+	-
chr1	59485682	59486283	+	-
chr1	59487643	59488244	+	-
chr1	59489623	59490224	+	-
chr1	59490812	59491413	+	-
chr1	59632135	59632736	+	-
chr1	59632999	59633600	+	-
chr1	59636963	59637564	+	-
chr1	59638181	59638782	+	-
chr1	59641536	59642137	+	-
chr1	59644214	59644815	+	-
chr1	59646858	59647459	+	-
chr1	59652473	59653074	+	-
chr1	59668301	59668902	-	+
chr1	59669308	59669909	-	+
chr1	59670724	59671325	-	+
chr1	59675200	59675801	+	-
chr1	59685306	59686129	+	+
chr1	59687088	59687689	-	+
chr1	59688495	59689096	-	+
chr1	59689622	59690724	+	-
chr1	59691177	59691778	+	-
chr1	59691988	59693058	+	-
chr1	59693507	59694108	+	-
chr1	59696794	59697395	+	-
chr1	59698779	59699380	-	+
chr1	59699453	59700054	+	-
chr1	59700056	59700966	+	+
chr1	59701103	59702664	+	+
chr1	59703893	59705357	+	+
chr1	59705461	59706165	+	+
chr1	59706447	59707101	+	+
chr1	59708260	59708861	+	-
chr1	59709716	59710317	+	-
chr1	59710721	59711944	+	+
chr1	59713283	59713884	-	+
chr1	59715024	59715625	-	+
chr1	59720072	59720673	-	+
chr1	59721739	59722340	-	+
chr1	59722683	59723284	+	-
chr1	59723587	59724791	+	+
chr1	59725478	59726079	+	-
chr1	59762809	59763410	-	+
chr1	59886513	59887114	-	+
chr1	60066930	60067531	+	-
chr1	60068231	60068832	+	-
chr1	60070498	60071099	+	-
chr1	60074156	60074757	+	-
chr1	60074935	60075609	+	+
chr1	60076134	60076735	+	-
chr1	60326814	60327415	+	-
chr1	60342775	60343384	+	+
chr1	60476522	60477554	+	-
chr1	60478009	60479038	+	-
chr1	60479512	60480681	+	-
chr1	60480862	60482037	+	-
chr1	60482282	60483453	+	-
chr1	60485565	60486166	+	-
chr1	60486367	60486968	+	-
chr1	60487125	60487726	+	-
chr1	60488620	60489221	+	-
chr1	60519575	60520176	+	-
chr1	60547612	60548213	+	-
chr1	60703906	60704507	+	-
chr1	60704879	60705480	+	-
chr1	60851512	60852113	+	-
chr1	62737122	62737723	+	-
chr1	62768258	62769252	+	-
chr1	62770930	62771531	+	-
chr1	62772081	62772682	+	-
chr1	62773039	62773640	+	-
chr1	62784097	62784698	+	-
chr1	62787215	62787816	+	-
chr1	62818733	62819764	+	-
chr1	62820417	62821018	+	-
chr1	63046305	63047143	+	-
chr1	63059352	63059953	+	-
chr1	63074315	63074916	+	-
chr1	63086645	63087246	+	-
chr1	63098814	63099415	+	-
chr1	63107574	63108175	+	-
chr1	63115513	63116114	+	-
chr1	63120023	63120624	+	-
chr1	63120899	63121500	+	-
chr1	63123794	63124395	+	-
chr1	63129984	63130585	+	-
chr1	63132531	63133132	+	-
chr1	63134330	63134931	+	-
chr1	63136315	63136916	+	-
chr1	63139217	63139818	+	-
chr1	63141458	63142059	+	-
chr1	63142289	63142890	+	-
chr1	63144590	63145191	+	-
chr1	63161889	63162490	+	-
chr1	63177018	63177619	-	+
chr1	63178061	63178662	+	-
chr1	63178718	63179319	+	-
chr1	63180782	63181689	+	+
chr1	63183062	63183663	-	+
chr1	63194699	63195300	+	-
chr1	63199840	63200441	+	-
chr1	63200824	63201425	+	-
chr1	63201861	63202462	+	-
chr1	63211034	63212203	+	-
chr1	63213169	63213770	+	-
chr1	63214805	63215908	+	-
chr1	63216765	63217366	+	-
chr1	63222349	63222950	+	-
chr1	63232999	63233600	+	-
chr1	63234577	63235178	+	-
chr1	63264917	63265518	+	-
chr1	63268026	63268627	+	-
chr1	63268781	63269382	+	-
chr1	63271663	63272264	+	-
chr1	63273072	63273673	+	-
chr1	63307777	63308378	+	-
chr1	63309586	63310187	+	-
chr1	63313079	63313680	+	-
chr1	63313815	63314416	+	-
chr1	63314953	63315554	+	-
chr1	63315860	63316461	+	-
chr1	63364360	63364961	+	-
chr1	63441060	63441661	+	-
chr1	63446097	63446698	+	-
chr1	63447201	63447802	+	-
chr1	63451965	63452566	+	-
chr1	63456334	63456935	+	-
chr1	63458220	63458821	+	-
chr1	63463580	63464181	+	-
chr1	63464906	63465507	+	-
chr1	63473574	63474175	+	-
chr1	63489424	63490025	+	-
chr1	63492401	63493002	+	-
chr1	63493791	63494392	+	-
chr1	63497037	63497638	+	-
chr1	63509637	63510238	+	-
chr1	63518945	63519546	+	-
chr1	63525723	63526324	+	-
chr1	63527545	63528146	+	-
chr1	63545164	63545765	+	-
chr1	63551742	63552343	+	-
chr1	63561443	63562044	+	-
chr1	63562084	63562685	+	-
chr1	63570885	63571486	+	-
chr1	63578764	63579365	+	-
chr1	63582255	63582856	+	-
chr1	63586375	63586976	+	-
chr1	63587684	63588631	+	-
chr1	63596239	63596979	+	+
chr1	63598258	63598859	-	+
chr1	63753648	63754249	+	-
chr1	63755459	63756060	+	-
chr1	64028049	64028650	-	+
chr1	64028826	64029427	-	+
chr1	64069622	64070223	-	+
chr1	64071414	64072015	-	+
chr1	64120956	64121557	-	+
chr1	64121760	64122381	+	+
chr1	64532841	64533442	-	+
chr1	64533856	64534457	-	+
chr1	64535345	64535946	-	+
chr1	64600616	64601217	+	-
chr1	64603312	64603913	+	-
chr1	64603962	64604563	+	-
chr1	64605277	64605878	+	-
chr1	64607270	64607871	+	-
chr1	64608527	64609128	+	-
chr1	64616097	64616698	-	+
chr1	64617183	64617784	-	+
chr1	64690912	64691513	-	+
chr1	64722848	64723449	+	-
chr1	64725861	64726462	+	-
chr1	64729478	64730079	+	-
chr1	64730637	64731238	+	-
chr1	64731855	64732456	+	-
chr1	64734575	64735176	+	-
chr1	64735839	64736440	+	-
chr1	64791090	64791691	-	+
chr1	64993760	64994388	+	+
chr1	65156636	65157237	+	-
chr1	65178412	65179013	+	-
chr1	65193242	65193843	+	-
chr1	65210237	65210838	+	-
chr1	65211401	65212002	+	-
chr1	65277381	65277982	+	-
chr1	65279409	65280010	+	-
chr1	65280279	65280880	+	-
chr1	65281035	65281636	+	-
chr1	65281842	65282443	+	-
chr1	66703421	66704022	+	-
chr1	66729845	66730446	+	-
chr1	66736070	66736671	+	-
chr1	66738991	66739592	+	-
chr1	66742864	66743465	+	-
chr1	66750348	66751487	+	-
chr1	66768170	66768771	+	-
chr1	66816406	66817007	+	-
chr1	71023114	71024264	+	-
chr1	71025367	71025968	+	-
chr1	71036703	71037304	+	-
chr1	71557179	71557780	-	+
chr1	71577056	71577657	+	-
chr1	71577726	71579042	-	+
chr1	71579546	71580147	+	-
chr1	71580527	71581128	+	-
chr1	71582121	71582722	+	-
chr1	71583175	71583776	+	-
chr1	71583832	71584433	-	+
chr1	71584755	71585356	+	-
chr1	71586648	71587249	+	-
chr1	71587292	71588459	+	-
chr1	71589352	71590525	+	-
chr1	71592064	71592665	+	-
chr1	71597025	71597626	+	-
chr1	71598252	71598853	+	-
chr1	71600196	71600797	+	-
chr1	71601498	71602099	-	+
chr1	71602162	71602763	+	-
chr1	71602906	71603507	+	-
chr1	71603591	71604192	+	-
chr1	71605113	71606295	+	+
chr1	71608689	71609718	+	-
chr1	71609866	71610467	+	-
chr1	71610995	71611596	+	-
chr1	71612962	71613563	+	-
chr1	71614759	71615360	-	+
chr1	71616568	71617169	+	-
chr1	71617374	71617975	+	-
chr1	71618286	71618887	+	-
chr1	71619412	71620013	+	-
chr1	71620674	71621679	+	-
chr1	71622818	71623419	+	-
chr1	71625588	71626189	+	-
chr1	71626772	71627615	+	+
chr1	71628093	71628694	+	-
chr1	71629032	71629633	+	-
chr1	71629910	71630511	+	-
chr1	71631715	71632316	+	-
chr1	71634254	71634855	+	-
chr1	71635437	71636038	+	-
chr1	71637743	71638344	-	+
chr1	71638782	71639383	+	-
chr1	71640231	71640832	-	+
chr1	71641755	71642356	+	-
chr1	71643335	71643936	+	-
chr1	71644721	71645890	+	-
chr1	71648029	71648630	+	-
chr1	71649399	71650566	+	-
chr1	71650762	71651898	+	+
chr1	71652448	71653351	+	+
chr1	71653531	71654132	-	+
chr1	72156951	72157552	+	-
chr1	72179895	72180496	+	-
chr1	72182171	72182772	+	-
chr1	72194114	72194715	+	-
chr1	72202576	72203177	+	-
chr1	72209429	72210030	+	-
chr1	72226395	72227012	+	+
chr1	72243851	72244738	+	+
chr1	72248591	72249192	+	-
chr1	72254531	72255644	+	+
chr1	72263734	72264748	+	-
chr1	72307862	72308463	+	-
chr1	72313343	72313944	+	-
chr1	72320583	72321184	+	-
chr1	72322766	72323367	+	-
chr1	72344853	72345454	+	-
chr1	72398798	72399399	+	-
chr1	72401275	72401876	+	-
chr1	72633940	72635112	+	-
chr1	72711260	72711861	-	+
chr1	72712909	72713510	+	-
chr1	72713786	72714387	-	+
chr1	72715029	72715791	+	+
chr1	72718872	72719473	+	-
chr1	72720515	72721116	+	-
chr1	72722089	72722690	+	-
chr1	72805466	72806067	+	-
chr1	72834983	72835584	+	-
chr1	72840080	72840681	+	-
chr1	72842327	72842928	+	-
chr1	72844329	72844930	+	-
chr1	72847848	72848449	+	-
chr1	72853434	72854035	+	-
chr1	74240036	74240637	+	-
chr1	74257072	74257673	+	-
chr1	74260012	74260613	+	-
chr1	74261825	74262426	+	-
chr1	74265287	74265888	-	+
chr1	74266838	74268024	+	+
chr1	74277269	74278384	+	+
chr1	74278911	74279884	+	+
chr1	74280745	74282489	+	+
chr1	74282509	74283659	-	+
chr1	74288539	74289140	+	-
chr1	74303743	74304344	+	-
chr1	74390261	74390862	+	-
chr1	74391336	74391937	+	-
chr1	74394553	74395154	+	-
chr1	74397304	74397905	+	-
chr1	74400676	74401277	-	+
chr1	74429447	74430048	-	+
chr1	74430291	74431087	+	+
chr1	74433245	74434369	+	-
chr1	74478118	74478719	+	-
chr1	74505029	74505630	-	+
chr1	74506587	74507206	+	+
chr1	74507759	74508360	+	-
chr1	74513305	74513906	+	-
chr1	74515931	74516532	+	-
chr1	74531616	74532217	+	-
chr1	74533036	74534134	+	+
chr1	74534910	74535511	-	+
chr1	74535694	74536295	-	+
chr1	74562123	74562724	-	+
chr1	74562738	74563339	+	-
chr1	74564211	74564812	+	-
chr1	74564948	74565549	+	-
chr1	74569646	74570247	+	-
chr1	74589176	74589777	+	-
chr1	74593235	74594957	+	-
chr1	74595065	74595666	+	-
chr1	74705217	74705818	-	+
chr1	74706013	74706614	-	+
chr1	74706856	74707457	-	+
chr1	74707975	74708576	-	+
chr1	74709326	74709927	-	+
chr1	74784154	74785293	+	-
chr1	74785961	74786562	+	-
chr1	74787315	74787916	+	-
chr1	75190201	75190802	-	+
chr1	75192645	75193625	+	+
chr1	75194695	75195296	+	-
chr1	75196546	75197147	+	-
chr1	75197630	75198231	+	-
chr1	75198413	75199014	+	-
chr1	75200167	75200768	+	-
chr1	75200800	75201401	+	-
chr1	75202966	75203567	+	-
chr1	75211861	75212462	+	-
chr1	75214181	75214782	+	-
chr1	75217054	75217655	+	-
chr1	75233639	75234240	+	-
chr1	75234435	75235036	+	-
chr1	75236411	75237012	-	+
chr1	75237273	75237874	-	+
chr1	75239763	75240364	-	+
chr1	75240568	75241169	-	+
chr1	75241639	75242240	-	+
chr1	75243809	75244410	-	+
chr1	75244530	75246083	+	+
chr1	75246485	75247133	+	+
chr1	75247307	75247908	+	-
chr1	75248481	75249082	-	+
chr1	75249213	75249814	-	+
chr1	75250180	75250781	-	+
chr1	75306171	75306772	+	-
chr1	75307192	75307793	+	-
chr1	75388604	75389205	+	-
chr1	75443189	75443790	+	-
chr1	75471974	75473363	+	-
chr1	75473424	75474462	+	-
chr1	75495315	75495916	+	-
chr1	75498957	75499558	+	-
chr1	75502704	75503305	+	-
chr1	75505046	75505647	+	-
chr1	75537690	75538291	+	-
chr1	75559701	75560302	+	-
chr1	77365560	77366161	+	-
chr1	77369846	77370447	+	-
chr1	77372299	77372900	+	-
chr1	77382689	77383290	+	-
chr1	77387806	77388407	+	-
chr1	77407317	77407918	+	-
chr1	77414818	77415419	+	-
chr1	77469090	77469691	+	-
chr1	77470954	77471555	+	-
chr1	77499923	77500524	+	-
chr1	77506413	77507014	+	-
chr1	78412205	78412806	+	-
chr1	78415181	78416620	+	-
chr1	78416800	78417690	+	-
chr1	78420749	78421350	+	-
chr1	78477235	78477836	+	-
chr1	78587837	78588438	+	-
chr1	78594438	78595039	+	-
chr1	78658669	78659270	-	+
chr1	78665208	78665809	+	-
chr1	78673053	78673654	+	-
chr1	78710801	78711402	+	-
chr1	79696108	79697068	+	+
chr1	79782217	79782818	+	-
chr1	80255646	80256247	-	+
chr1	80256664	80257265	-	+
chr1	80258552	80259215	+	+
chr1	80259217	80259818	+	-
chr1	80260118	80260830	+	+
chr1	80261653	80262254	+	-
chr1	80263573	80264507	+	+
chr1	80268095	80268696	-	+
chr1	80305977	80306578	+	-
chr1	80335683	80336627	-	+
chr1	80337984	80338585	-	+
chr1	80338984	80340564	+	+
chr1	82753238	82753839	+	-
chr1	82753942	82754543	+	-
chr1	82758107	82758708	+	-
chr1	82759038	82760174	+	-
chr1	82840178	82840779	+	-
chr1	82846478	82847079	+	-
chr1	82849094	82849695	+	-
chr1	82857137	82857738	+	-
chr1	82861819	82862420	+	-
chr1	82864555	82865156	+	-
chr1	82870724	82871325	+	-
chr1	82873505	82874106	+	-
chr1	82890803	82891831	+	-
chr1	82893313	82893914	+	-
chr1	82896459	82897060	+	-
chr1	82899024	82899625	+	-
chr1	82901237	82901838	-	+
chr1	82901954	82902697	+	+
chr1	82904131	82904732	+	-
chr1	82906409	82907092	+	+
chr1	82908101	82908702	+	-
chr1	82909492	82911011	+	+
chr1	82911530	82912858	+	+
chr1	82914403	82915004	+	-
chr1	82915054	82916248	+	+
chr1	84719123	84719763	+	+
chr1	84720477	84721120	+	+
chr1	84721980	84722581	-	+
chr1	84724940	84726142	+	-
chr1	84726575	84727176	+	-
chr1	84727727	84728700	+	-
chr1	84729362	84729963	+	-
chr1	84730288	84730889	+	-
chr1	84731347	84731948	+	-
chr1	84732073	84732674	+	-
chr1	84732824	84733425	+	-
chr1	84734461	84735578	+	-
chr1	84736183	84736784	+	-
chr1	84736861	84737462	+	-
chr1	84739076	84740079	+	-
chr1	84740242	84740843	+	-
chr1	84741235	84741836	+	-
chr1	84742341	84742942	+	-
chr1	84743700	84744301	+	-
chr1	84744477	84746105	+	-
chr1	84746306	84746907	+	-
chr1	84746964	84747565	+	-
chr1	84748259	84749702	+	-
chr1	84750235	84750836	+	-
chr1	84750945	84751546	+	-
chr1	84752767	84753368	+	-
chr1	84754980	84755581	+	-
chr1	84755742	84756745	+	-
chr1	84757189	84757790	+	-
chr1	84758260	84758861	+	-
chr1	84760490	84761091	+	-
chr1	84761370	84761971	+	-
chr1	84762514	84763115	+	-
chr1	84763451	84764052	+	-
chr1	84764077	84764678	+	-
chr1	84765077	84765678	+	-
chr1	84766999	84767600	+	-
chr1	84768410	84769075	+	+
chr1	84773774	84774375	+	-
chr1	84776503	84777642	+	-
chr1	84778033	84778634	+	-
chr1	84779092	84780152	+	-
chr1	84780644	84781245	+	-
chr1	84784235	84784836	+	-
chr1	84784990	84785591	+	-
chr1	84785852	84786453	+	-
chr1	84787646	84788661	+	-
chr1	84788885	84790017	+	-
chr1	84790438	84791626	+	-
chr1	84792089	84792690	+	-
chr1	84793546	84794147	+	-
chr1	84795563	84796640	+	-
chr1	84796654	84797971	+	-
chr1	84798088	84798992	+	-
chr1	84800016	84800617	+	-
chr1	84801032	84801786	+	-
chr1	84804090	84804691	+	-
chr1	84805820	84806421	+	-
chr1	84806688	84807289	+	-
chr1	84807763	84808364	+	-
chr1	84808949	84810022	+	-
chr1	84810705	84811306	+	-
chr1	84812483	84813084	+	-
chr1	84815109	84815710	+	-
chr1	84816422	84818009	+	-
chr1	84818142	84819160	+	-
chr1	84821480	84822081	+	-
chr1	84822547	84823505	+	-
chr1	84825340	84825941	+	-
chr1	84826607	84827208	+	-
chr1	84828344	84828945	+	-
chr1	84831423	84832601	+	-
chr1	84833497	84834098	+	-
chr1	84839077	84839678	+	-
chr1	84844343	84845280	+	-
chr1	84846612	84847213	+	-
chr1	84848314	84848915	+	-
chr1	84850306	84851398	+	-
chr1	84861151	84861752	+	-
chr1	84869355	84869956	+	-
chr1	85852987	85853588	+	-
chr1	85853992	85854593	+	-
chr1	86072942	86073543	-	+
chr1	86074845	86075446	-	+
chr1	86075740	86076939	-	+
chr1	86090986	86091587	-	+
chr1	86099052	86099653	+	-
chr1	86102883	86103484	-	+
chr1	86104640	86105241	-	+
chr1	86115711	86116561	+	+
chr1	86134927	86135528	-	+
chr1	86139690	86140566	+	+
chr1	86140622	86141223	-	+
chr1	86141308	86141909	-	+
chr1	86142234	86144184	+	+
chr1	86154013	86154614	-	+
chr1	86304239	86304967	+	-
chr1	86305431	86306032	+	-
chr1	86308810	86309411	+	-
chr1	86311344	86311945	+	-
chr1	86337556	86338157	-	+
chr1	86341362	86341963	+	-
chr1	86342690	86343291	-	+
chr1	86343871	86344472	+	-
chr1	86358433	86359034	+	-
chr1	86363058	86363659	+	-
chr1	86364399	86365000	+	-
chr1	86435268	86435869	-	+
chr1	86440589	86441522	-	+
chr1	86443984	86444585	-	+
chr1	86445969	86446570	+	-
chr1	86466742	86467343	+	-
chr1	86467943	86468544	+	-
chr1	86470921	86471698	+	+
chr1	86471883	86472502	+	+
chr1	86486424	86487025	+	-
chr1	86487685	86488770	+	+
chr1	86497436	86498037	+	-
chr1	86502896	86503497	+	-
chr1	86504527	86505128	+	-
chr1	86509623	86510224	+	-
chr1	86524253	86525396	+	-
chr1	86525706	86526308	+	+
chr1	86527935	86528536	+	-
chr1	86530903	86532058	+	+
chr1	86541614	86542215	+	-
chr1	86554729	86555330	+	-
chr1	86587057	86587658	+	-
chr1	86609092	86609693	+	-
chr1	86610663	86611437	+	-
chr1	86611629	86612793	+	-
chr1	86624132	86624733	-	+
chr1	87055069	87055670	+	-
chr1	87214928	87215529	-	+
chr1	87220730	87221331	+	-
chr1	87221915	87222516	+	-
chr1	87225153	87226329	+	-
chr1	87226943	87227544	+	-
chr1	87228803	87229404	-	+
chr1	87230271	87230872	-	+
chr1	87231239	87231840	+	-
chr1	87232929	87233983	+	+
chr1	87234599	87235200	-	+
chr1	87235699	87236300	-	+
chr1	87236609	87237477	+	+
chr1	87238346	87238947	-	+
chr1	87240019	87240620	+	-
chr1	87240943	87241628	+	+
chr1	87242186	87242787	+	-
chr1	87242961	87243676	+	+
chr1	87243712	87244313	-	+
chr1	87245038	87245639	-	+
chr1	87327509	87328110	-	+
chr1	87360743	87361344	+	-
chr1	87401027	87401628	+	-
chr1	87451918	87452519	+	-
chr1	87452704	87453305	+	-
chr1	87453649	87455152	+	-
chr1	87456523	87457437	+	+
chr1	87458635	87459236	-	+
chr1	87684101	87684702	+	-
chr1	87689641	87690732	+	-
chr1	87691626	87692227	+	-
chr1	87693064	87693665	+	-
chr1	87695233	87695834	+	-
chr1	87696553	87697154	+	-
chr1	87697855	87698456	+	-
chr1	87699525	87700126	+	-
chr1	87700874	87701475	+	-
chr1	87704183	87704784	+	-
chr1	87710931	87711532	+	-
chr1	87714325	87715744	+	-
chr1	87716344	87716945	+	-
chr1	87717884	87718485	+	-
chr1	87718615	87719216	+	-
chr1	87721769	87722370	+	-
chr1	87723142	87723743	+	-
chr1	87791728	87792329	+	-
chr1	87792494	87793095	-	+
chr1	87793338	87794302	+	+
chr1	87794606	87795279	+	+
chr1	87934345	87934946	-	+
chr1	87940001	87940961	+	+
chr1	87941102	87942313	+	+
chr1	87942545	87943146	+	-
chr1	87943288	87943889	+	-
chr1	87943890	87944491	+	-
chr1	87945397	87948174	+	+
chr1	87950154	87951603	+	+
chr1	87952409	87953010	-	+
chr1	87953011	87953612	-	+
chr1	88103267	88103868	-	+
chr1	88464614	88465215	+	-
chr1	88465905	88466506	+	-
chr1	88466846	88468575	+	-
chr1	89096757	89097358	+	-
chr1	89098366	89098967	+	-
chr1	89099296	89099897	+	-
chr1	89101340	89101941	+	-
chr1	89155580	89156181	+	-
chr1	89580843	89581444	+	-
chr1	89871098	89872280	+	-
chr1	89875472	89876073	+	-
chr1	89876932	89877533	+	-
chr1	89877868	89878469	+	-
chr1	89924777	89925378	+	-
chr1	89925708	89926309	+	-
chr1	89935989	89936590	+	-
chr1	90215800	90216401	-	+
chr1	90614653	90615254	+	-
chr1	90627458	90628059	+	-
chr1	90764951	90766018	-	+
chr1	90768313	90768914	-	+
chr1	90768946	90770706	-	+
chr1	90783062	90783663	-	+
chr1	90784868	90785469	-	+
chr1	90785713	90786314	-	+
chr1	90787641	90788242	-	+
chr1	90788432	90789033	-	+
chr1	90789860	90790461	-	+
chr1	90794695	90795296	-	+
chr1	90796388	90796989	-	+
chr1	90797424	90798025	-	+
chr1	90799116	90799717	-	+
chr1	90801929	90802530	-	+
chr1	90813207	90813808	-	+
chr1	90826630	90827231	-	+
chr1	91136098	91136699	-	+
chr1	91136900	91137863	-	+
chr1	91293898	91294855	+	-
chr1	91294910	91295511	+	-
chr1	91297804	91298405	+	-
chr1	91300192	91300793	+	-
chr1	91318509	91319110	+	-
chr1	91321068	91321669	+	-
chr1	91323310	91323911	-	+
chr1	91364862	91365463	-	+
chr1	91366773	91367822	-	+
chr1	91368452	91369053	-	+
chr1	91369343	91369944	+	-
chr1	91370397	91370998	+	-
chr1	91372178	91373083	+	+
chr1	91375701	91376302	-	+
chr1	91377698	91378299	+	-
chr1	91378914	91379515	+	-
chr1	91380266	91380867	+	-
chr1	91390880	91391481	+	-
chr1	91458458	91459059	-	+
chr1	91532827	91533428	+	-
chr1	91533786	91534387	+	-
chr1	91536240	91536841	+	-
chr1	91539721	91540322	+	-
chr1	91556474	91557075	+	-
chr1	91559086	91560173	+	-
chr1	91560795	91561396	+	-
chr1	91814621	91815222	-	+
chr1	91816751	91817352	-	+
chr1	91819690	91820291	-	+
chr1	91820292	91820893	-	+
chr1	91822526	91823127	-	+
chr1	91823208	91824104	-	+
chr1	91824565	91825166	-	+
chr1	91826135	91826736	-	+
chr1	91828572	91829173	-	+
chr1	91834362	91834963	-	+
chr1	91835655	91836256	-	+
chr1	91839161	91839762	-	+
chr1	91840582	91841682	-	+
chr1	91848705	91849306	-	+
chr1	91851146	91851747	-	+
chr1	91853018	91853619	-	+
chr1	91856953	91857554	-	+
chr1	91861388	91861989	-	+
chr1	91862367	91863389	-	+
chr1	91864235	91864836	-	+
chr1	91927181	91928066	+	-
chr1	91928949	91929550	+	-
chr1	91930023	91930624	+	-
chr1	91941975	91942576	+	-
chr1	91948229	91948830	+	-
chr1	91949061	91949662	+	-
chr1	91950748	91951349	+	-
chr1	91970933	91971534	+	-
chr1	91985901	91986502	+	-
chr1	92014966	92015567	+	-
chr1	92063588	92064189	-	+
chr1	92137469	92138070	+	-
chr1	92148922	92149523	+	-
chr1	92181028	92181629	+	-
chr1	92182265	92182866	+	-
chr1	92437570	92438171	-	+
chr1	92636019	92636620	+	-
chr1	92857266	92857867	-	+
chr1	92860625	92861615	+	+
chr1	92861771	92862852	-	+
chr1	92864688	92865289	-	+
chr1	92867581	92868182	-	+
chr1	92904450	92905051	+	-
chr1	92906941	92908055	+	-
chr1	92917112	92917713	+	-
chr1	92919840	92921986	+	-
chr1	92922031	92922632	+	-
chr1	92930675	92931276	+	-
chr1	92942293	92942894	+	-
chr1	92942902	92943503	+	-
chr1	92943559	92944160	+	-
chr1	92949592	92950193	+	-
chr1	92950386	92950987	+	-
chr1	93195536	93196137	+	-
chr1	93232833	93233434	+	-
chr1	93235702	93236303	-	+
chr1	93261484	93262085	+	-
chr1	93263757	93264358	-	+
chr1	93266299	93266900	-	+
chr1	93267153	93267754	-	+
chr1	93270536	93271137	-	+
chr1	93272142	93272743	-	+
chr1	93273229	93273830	-	+
chr1	93274984	93275585	-	+
chr1	93276609	93277483	+	+
chr1	93277905	93278506	-	+
chr1	93278848	93279449	-	+
chr1	93279945	93280546	+	-
chr1	93280553	93282241	+	+
chr1	93282947	93283548	-	+
chr1	93285284	93285885	-	+
chr1	93286007	93286608	-	+
chr1	93287323	93287924	-	+
chr1	93288903	93290035	-	+
chr1	93290665	93291266	-	+
chr1	93293624	93294225	-	+
chr1	93294879	93295480	-	+
chr1	93295488	93296413	+	+
chr1	93296688	93297289	-	+
chr1	93298014	93298615	-	+
chr1	93298688	93299289	+	-
chr1	93299469	93300428	+	+
chr1	93300548	93301149	+	-
chr1	93301840	93302577	+	+
chr1	93305561	93306162	+	-
chr1	93353408	93354009	+	-
chr1	93369365	93369966	+	-
chr1	93371147	93371748	+	-
chr1	93399553	93400154	-	+
chr1	93402996	93403597	-	+
chr1	93404194	93404903	+	+
chr1	93406280	93407609	+	+
chr1	93410187	93410788	-	+
chr1	93410948	93411549	-	+
chr1	93415855	93416456	-	+
chr1	93416702	93417303	-	+
chr1	93417762	93418363	-	+
chr1	93427017	93427618	-	+
chr1	93444556	93446284	+	+
chr1	93479247	93479848	-	+
chr1	93496533	93497134	+	-
chr1	93504091	93504692	+	-
chr1	93510066	93510667	+	-
chr1	93511186	93512083	+	+
chr1	93615303	93616259	-	+
chr1	93617439	93618112	+	+
chr1	93618671	93619648	-	+
chr1	93619712	93621152	+	+
chr1	93783890	93784491	+	-
chr1	93785690	93786291	+	-
chr1	93791288	93791889	+	-
chr1	93793321	93793922	+	-
chr1	93794402	93795003	+	-
chr1	93795776	93796377	+	-
chr1	93799582	93801110	+	-
chr1	93801449	93802050	+	-
chr1	93804284	93804885	-	+
chr1	93805000	93805601	+	-
chr1	93815978	93816579	+	-
chr1	93821248	93821849	+	-
chr1	93822481	93823082	+	-
chr1	93824059	93824660	+	-
chr1	93825460	93826061	+	-
chr1	93919384	93919985	+	-
chr1	96875155	96875756	+	-
chr1	96882009	96882610	+	-
chr1	96882821	96884475	+	-
chr1	96886442	96887043	+	-
chr1	96888707	96889308	+	-
chr1	97702011	97702612	+	-
chr1	105515882	105516483	+	-
chr1	105734523	105735124	+	-
chr1	105747703	105748304	-	+
chr1	105757874	105758475	+	-
chr1	105759864	105760465	+	-
chr1	105989122	105989723	-	+
chr1	105989761	105990362	-	+
chr1	105993689	105994290	+	-
chr1	106030611	106031212	+	-
chr1	106715963	106716564	+	-
chr1	106718629	106719230	+	-
chr1	106722116	106722717	+	-
chr1	106726105	106726706	+	-
chr1	106726748	106727349	+	-
chr1	106758906	106759740	+	+
chr1	106759891	106760574	+	+
chr1	106760896	106761913	+	+
chr1	106762220	106763320	+	+
chr1	106763643	106764244	+	-
chr1	106764325	106765358	+	+
chr1	106766554	106767155	+	-
chr1	106767868	106768469	-	+
chr1	106794357	106794958	-	+
chr1	113523417	113524018	+	-
chr1	113928753	113929354	+	-
chr1	113929617	113930218	+	-
chr1	113930458	113931059	+	-
chr1	113931610	113932211	+	-
chr1	113932239	113933360	+	-
chr1	113934870	113935471	+	-
chr1	113941668	113942269	+	-
chr1	113942655	113943256	+	-
chr1	113954518	113955119	+	-
chr1	113955196	113955797	+	-
chr1	113957739	113958340	+	-
chr1	118293131	118294605	+	+
chr1	118294839	118295934	+	+
chr1	118296727	118297328	+	-
chr1	118331398	118332287	+	+
chr1	118333110	118333711	+	-
chr1	118334140	118335279	+	+
chr1	118335880	118336481	+	-
chr1	118337662	118338263	+	-
chr1	118338638	118340360	-	+
chr1	118386022	118386623	+	-
chr1	118458735	118459336	+	-
chr1	118494267	118494868	-	+
chr1	118611742	118612521	+	+
chr1	118613722	118614323	-	+
chr1	118627956	118628557	+	-
chr1	118629057	118629658	+	-
chr1	118630588	118631726	+	-
chr1	118632912	118633513	+	-
chr1	118633880	118634481	+	-
chr1	118635251	118635852	+	-
chr1	118636639	118637240	+	-
chr1	118637437	118638038	+	-
chr1	118638575	118639176	+	-
chr1	118639516	118640117	+	-
chr1	118641133	118641734	+	-
chr1	118642792	118643908	+	-
chr1	118644155	118644756	+	-
chr1	118644946	118645547	+	-
chr1	118646200	118646801	+	-
chr1	118649450	118650051	+	-
chr1	118650487	118651596	+	-
chr1	118653323	118654458	+	-
chr1	118654680	118655281	+	-
chr1	118655848	118656449	+	-
chr1	118657048	118657649	+	-
chr1	118659825	118660426	+	-
chr1	118660589	118661190	+	-
chr1	118662083	118662684	+	-
chr1	118662983	118663584	+	-
chr1	118663673	118665234	+	-
chr1	118665958	118666559	+	-
chr1	118668269	118668870	+	-
chr1	118670333	118670934	+	-
chr1	118671176	118671777	+	-
chr1	118671860	118672461	+	-
chr1	118675364	118675965	+	-
chr1	118676347	118676948	+	-
chr1	118678447	118679048	+	-
chr1	118679186	118679787	+	-
chr1	118680360	118680961	+	-
chr1	118837522	118838123	+	-
chr1	118858478	118859079	+	-
chr1	118875079	118875680	+	-
chr1	118890449	118891050	+	-
chr1	118904994	118905595	+	-
chr1	118936113	118936714	+	-
chr1	118966808	118967409	+	-
chr1	118999698	119000299	+	-
chr1	119023807	119024408	+	-
chr1	119036986	119037587	+	-
chr1	119040881	119041482	+	-
chr1	119042694	119043295	+	-
chr1	119046452	119047053	+	-
chr1	119047692	119048293	+	-
chr1	119048409	119049010	+	-
chr1	119049619	119050220	+	-
chr1	119053344	119053945	+	-
chr1	119075197	119075798	+	-
chr1	119083363	119083964	+	-
chr1	119301612	119302213	+	-
chr1	119303298	119303899	+	-
chr1	119304047	119304648	+	-
chr1	119414013	119414614	+	-
chr1	119415862	119416463	+	-
chr1	119416541	119417142	+	-
chr1	119417460	119418061	+	-
chr1	119418962	119419563	+	-
chr1	119422255	119422856	+	-
chr1	119468062	119468663	+	-
chr1	119468709	119469310	+	-
chr1	119469336	119469937	+	-
chr1	119526070	119526671	+	-
chr1	119528787	119529388	+	-
chr1	120065483	120066084	+	-
chr1	120073868	120074469	+	-
chr1	120074567	120075168	+	-
chr1	120082897	120083498	+	-
chr1	120083533	120084134	+	-
chr1	120088173	120088774	+	-
chr1	120091384	120091985	+	-
chr1	120112079	120112680	+	-
chr1	120223604	120224205	-	+
chr1	120235938	120236539	-	+
chr1	121301787	121302388	+	-
chr1	121549433	121550344	+	-
chr1	121550636	121551237	+	-
chr1	121551312	121551913	+	-
chr1	121554284	121555189	-	+
chr1	121556280	121556881	+	-
chr1	125388219	125389288	-	+
chr1	125390375	125391519	+	+
chr1	125398395	125398996	-	+
chr1	125525388	125525989	+	-
chr1	125559730	125560454	+	+
chr1	125560914	125561515	-	+
chr1	125596609	125597210	+	-
chr1	127483958	127484559	+	-
chr1	127767351	127767952	+	-
chr1	127803011	127803612	+	-
chr1	127804044	127804645	+	-
chr1	127807200	127808201	+	+
chr1	127869887	127870488	-	+
chr1	127941955	127942556	+	-
chr1	127944556	127945299	+	+
chr1	127945986	127946587	+	-
chr1	127948474	127949075	-	+
chr1	127952554	127953155	+	-
chr1	128239963	128240564	+	-
chr1	128241131	128242028	+	-
chr1	128244098	128244699	-	+
chr1	128245003	128246189	-	+
chr1	128278175	128278776	+	-
chr1	128280482	128281083	+	-
chr1	128323809	128324410	+	-
chr1	128325064	128325665	+	-
chr1	128330057	128331324	+	+
chr1	128331723	128332324	+	-
chr1	128339223	128340434	+	+
chr1	128340858	128341459	+	-
chr1	128345517	128346591	+	-
chr1	128349207	128349808	+	-
chr1	128353007	128353608	+	-
chr1	128356999	128357600	-	+
chr1	128357676	128358277	-	+
chr1	128359088	128359963	+	+
chr1	128362532	128363133	+	-
chr1	128392045	128392646	+	-
chr1	128416440	128417347	+	+
chr1	130715367	130715968	+	-
chr1	130716060	130716766	+	+
chr1	130717403	130718004	+	-
chr1	130725139	130726235	+	-
chr1	131040503	131041657	-	+
chr1	131042293	131042894	-	+
chr1	131045694	131046295	-	+
chr1	131048908	131049509	-	+
chr1	131049745	131050346	-	+
chr1	131051459	131052060	-	+
chr1	131052779	131053380	-	+
chr1	131060571	131061172	-	+
chr1	131082536	131083137	-	+
chr1	131087254	131087855	-	+
chr1	131091228	131091829	-	+
chr1	131092405	131093577	-	+
chr1	131093995	131094596	-	+
chr1	131094802	131095403	-	+
chr1	131095910	131096511	-	+
chr1	131125390	131125991	+	-
chr1	131126360	131126961	+	-
chr1	131127394	131128516	+	-
chr1	131128859	131129460	+	-
chr1	131130026	131130627	+	-
chr1	131131659	131132260	+	-
chr1	131138466	131139067	+	-
chr1	131146344	131146945	+	-
chr1	131148930	131149531	+	-
chr1	131149990	131151061	+	-
chr1	131164869	131165470	+	-
chr1	131167572	131168173	+	-
chr1	131168437	131169038	+	-
chr1	131171591	131172192	+	-
chr1	131174337	131174938	+	-
chr1	131175699	131176300	+	-
chr1	131180653	131181254	+	-
chr1	131282343	131282944	+	-
chr1	131283076	131283677	+	-
chr1	131285352	131285953	+	-
chr1	131848186	131848787	+	-
chr1	131849325	131849926	+	-
chr1	131867707	131868308	+	-
chr1	131873757	131874358	+	-
chr1	131892434	131893035	+	-
chr1	131909667	131910268	+	-
chr1	131911095	131911896	+	+
chr1	131912180	131912781	+	-
chr1	131913113	131913714	+	-
chr1	131914665	131915266	+	-
chr1	131915636	131916237	+	-
chr1	131917317	131917918	+	-
chr1	131918484	131919476	+	-
chr1	131920625	131921226	+	-
chr1	131921648	131922566	+	-
chr1	131923206	131923807	+	-
chr1	131924616	131925217	+	-
chr1	131926330	131926931	+	-
chr1	131927962	131928563	+	-
chr1	131929126	131929727	+	-
chr1	131931672	131932845	+	-
chr1	131933746	131934902	-	+
chr1	131936448	131937049	-	+
chr1	131937578	131938179	-	+
chr1	131938491	131939092	-	+
chr1	131941527	131942128	+	-
chr1	131942549	131943150	-	+
chr1	131943225	131943826	-	+
chr1	131944168	131945124	-	+
chr1	131945408	131946009	+	-
chr1	131946211	131946812	-	+
chr1	131947443	131948044	+	-
chr1	132006488	132007089	-	+
chr1	132007531	132008132	-	+
chr1	132008165	132008766	-	+
chr1	132009724	132010325	-	+
chr1	132010718	132011319	-	+
chr1	132033552	132034153	+	-
chr1	132034355	132034956	+	-
chr1	132106585	132107186	-	+
chr1	132107750	132108771	-	+
chr1	132109115	132110156	-	+
chr1	132191241	132191842	+	-
chr1	132192423	132193024	+	-
chr1	132193851	132194997	+	-
chr1	132199912	132200513	+	-
chr1	132264669	132265270	+	-
chr1	132266058	132266659	+	-
chr1	132268941	132269542	+	-
chr1	132291817	132292418	-	+
chr1	132462928	132463529	+	-
chr1	132465784	132466385	+	-
chr1	132468915	132469980	+	-
chr1	132470556	132471157	+	-
chr1	132477211	132477812	+	-
chr1	132482978	132483579	+	-
chr1	132500369	132500970	+	-
chr1	132505955	132506556	+	-
chr1	132507414	132508574	+	-
chr1	132508769	132509888	+	-
chr1	132510679	132511970	+	-
chr1	132512350	132512951	+	-
chr1	132976095	132976696	+	-
chr1	132977069	132977866	+	+
chr1	132978410	132979011	-	+
chr1	132981084	132981685	+	-
chr1	132981727	132982328	-	+
chr1	132982758	132984356	-	+
chr1	132985986	132986587	+	-
chr1	132987003	132987604	+	-
chr1	132987871	132988472	+	-
chr1	132989368	132990324	+	+
chr1	132991717	132992318	+	-
chr1	132993375	132993976	+	-
chr1	132994526	132995127	+	-
chr1	132995533	132996134	+	-
chr1	132996732	132997333	+	-
chr1	132997695	132998296	+	-
chr1	132999148	133000265	+	-
chr1	133000312	133001339	+	-
chr1	133003437	133004427	+	-
chr1	133004711	133005312	+	-
chr1	133006399	133007000	+	-
chr1	133007234	133007835	+	-
chr1	133008713	133009815	+	-
chr1	133010851	133011452	+	-
chr1	133012322	133012923	+	-
chr1	133013142	133013743	+	-
chr1	133013978	133014579	+	-
chr1	133015142	133015743	+	-
chr1	133016270	133017421	+	-
chr1	133018310	133018911	+	-
chr1	133019638	133020239	+	-
chr1	133130298	133131276	+	+
chr1	133131680	133132281	-	+
chr1	133132353	133132954	+	-
chr1	133133200	133134832	+	+
chr1	133137364	133137965	+	-
chr1	133137999	133139225	+	+
chr1	133139240	133139841	-	+
chr1	133140283	133141439	+	+
chr1	133142727	133143927	+	-
chr1	133379187	133379788	+	-
chr1	133380138	133380739	+	-
chr1	133492759	133493360	+	-
chr1	133613613	133614248	+	+
chr1	133614693	133615747	+	+
chr1	133616231	133616832	-	+
[truncated: 50,557 more rows]

## Sheet: Sheet1
Ctr9 binding site coordinates (mm10)			ESCs	NIH-3T3
chr1	30801424	30802063	+	+
chr1	58457907	58458542	+	+
chr1	87948654	87949689	-	+
chr1	152829725	152830381	+	+
chr1	185204453	185205054	-	+
chr1	4898530	4900076	+	+
chr1	16105342	16105943	-	+
chr1	20807091	20807811	+	+
chr1	30948966	30950375	+	+
chr1	33914311	33914912	-	+
chr1	36322570	36323568	+	+
chr1	38043407	38044607	-	+
chr1	40025623	40026797	+	+
chr1	45366892	45367493	-	+
chr1	51477826	51478580	+	+
chr1	52231998	52232611	+	+
chr1	58391851	58392932	-	+
chr1	59669965	59670610	+	+
chr1	59702882	59703830	+	+
chr1	74268484	74269511	+	+
chr1	74285003	74285604	-	+
chr1	74398734	74399830	-	+
chr1	74431355	74432647	+	+
chr1	75251541	75252142	-	+
chr1	80264586	80266320	-	+
chr1	82902720	82903684	+	+
chr1	86064555	86065156	-	+
chr1	86359582	86361221	+	+
chr1	86441770	86442465	+	+
chr1	86622111	86623225	-	+
chr1	87457583	87458295	+	+
chr1	91373413	91374014	-	+
chr1	91815568	91816169	-	+
chr1	92438307	92439032	+	+
chr1	93404921	93405609	+	+
chr1	105758690	105759291	-	+
chr1	125386368	125387499	-	+
chr1	127809035	127811827	+	+
chr1	131038304	131040453	-	+
chr1	131940110	131940711	-	+
chr1	133134858	133136943	+	+
chr1	133643078	133644500	+	+
chr1	133660238	133660916	+	+
chr1	136265398	136265999	-	+
chr1	151371754	151372355	-	+
chr1	159350309	159351312	+	+
chr1	162217623	162218224	-	+
chr1	165642150	165642751	-	+
chr1	168312309	168312910	-	+
chr1	172211828	172212429	-	+
chr1	178405151	178405752	-	+
chr1	180813777	180814472	+	+
chr1	181092139	181092740	-	+
chr1	189873285	189874233	-	+
chr1	193101743	193102344	-	+
chr1	4858458	4859059	-	+
chr1	4859390	4859991	-	+
chr1	4897871	4898472	-	+
chr1	4900096	4900799	+	+
chr1	4901146	4902281	-	+
chr1	4903749	4904350	-	+
chr1	4904378	4904979	-	+
chr1	4905152	4906303	+	+
chr1	4906798	4907638	+	+
chr1	4908867	4909468	-	+
chr1	4909716	4910317	-	+
chr1	4910596	4911197	-	+
chr1	4911548	4912149	-	+
chr1	4912457	4913058	-	+
chr1	6255839	6256440	-	+
chr1	6257827	6258428	-	+
chr1	9545624	9546225	-	+
chr1	9718946	9719674	+	+
chr1	9940181	9940801	+	+
chr1	9942659	9943260	-	+
chr1	10022303	10023028	+	+
chr1	10125691	10126292	-	+
chr1	10126906	10127507	-	+
chr1	10127995	10128596	-	+
chr1	10129315	10129916	-	+
chr1	10130842	10131443	-	+
chr1	10133528	10134129	-	+
chr1	10134339	10136500	-	+
chr1	10137598	10138199	-	+
chr1	10138286	10138887	-	+
chr1	10162071	10162672	-	+
chr1	13135997	13136598	-	+
chr1	13659433	13660542	+	+
chr1	15848584	15849441	+	+
chr1	15851257	15852041	+	+
chr1	15860222	15861286	+	+
chr1	16097743	16098344	-	+
chr1	16099000	16099676	+	+
chr1	16101168	16101769	-	+
chr1	16558336	16558937	-	+
chr1	16559198	16560334	-	+
chr1	16560912	16561513	-	+
chr1	16561976	16563247	+	+
chr1	16564424	16565192	+	+
chr1	16618660	16619261	-	+
chr1	16641842	16642922	+	+
chr1	16656264	16656865	-	+
chr1	16688292	16688893	-	+
chr1	20796122	20796723	-	+
chr1	20797512	20798113	-	+
chr1	20798696	20799297	-	+
chr1	20800826	20801632	+	+
chr1	20804743	20805392	+	+
chr1	20805497	20806252	+	+
chr1	24008849	24009450	-	+
chr1	30799204	30800129	+	+
chr1	30800577	30801178	-	+
chr1	30872797	30873398	-	+
chr1	30940351	30941209	+	+
chr1	30941648	30942249	-	+
chr1	30942428	30943029	-	+
chr1	30943075	30943676	-	+
chr1	30945009	30945610	-	+
chr1	30946610	30947696	+	+
chr1	31680836	31681437	-	+
chr1	31681770	31682371	-	+
chr1	31682421	31683022	-	+
chr1	31683389	31683990	-	+
chr1	31685224	31685825	-	+
chr1	31685943	31686544	-	+
chr1	31688668	31689269	-	+
chr1	31689712	31690313	-	+
chr1	31738051	31738652	-	+
chr1	31739129	31739730	-	+
chr1	31741065	31741666	-	+
chr1	31745081	31745682	-	+
chr1	31749099	31749700	-	+
chr1	31750178	31750779	-	+
chr1	31753179	31753780	-	+
chr1	33742585	33743499	+	+
chr1	33756353	33756954	-	+
chr1	33757293	33758848	+	+
chr1	33766732	33767333	-	+
chr1	33908427	33909028	-	+
chr1	34043940	34044541	-	+
chr1	34131877	34132478	-	+
chr1	34132699	34133300	-	+
chr1	34140311	34141270	+	+
chr1	34150328	34150929	-	+
chr1	34152959	34153560	-	+
chr1	34184073	34184691	+	+
chr1	34185315	34186284	+	+
chr1	34186557	34187275	+	+
chr1	34187676	34188482	+	+
chr1	34189042	34190434	+	+
chr1	34190868	34191599	+	+
chr1	34309167	34309846	+	+
chr1	34309979	34310761	+	+
chr1	34801709	34802310	-	+
chr1	34807572	34808887	+	+
chr1	34809303	34809904	-	+
chr1	34810263	34810864	-	+
chr1	34811628	34812415	+	+
chr1	34842212	34842813	-	+
chr1	36137897	36138892	+	+
chr1	36323583	36324184	-	+
chr1	36325356	36325957	-	+
chr1	36327405	36328006	-	+
chr1	36332400	36334113	+	+
chr1	36334181	36335201	+	+
chr1	36554937	36555538	-	+
chr1	36556798	36557399	-	+
chr1	36694866	36696114	+	+
chr1	37982037	37982638	-	+
chr1	37983440	37984041	-	+
chr1	37996332	37996933	-	+
chr1	38042406	38043007	-	+
chr1	38046935	38047925	+	+
chr1	38047961	38049989	+	+
chr1	38050049	38050738	+	+
chr1	38051213	38052518	+	+
chr1	38052805	38053457	+	+
chr1	38053607	38054367	+	+
chr1	38054587	38055365	+	+
chr1	38057966	38059744	+	+
chr1	38082370	38082971	-	+
chr1	38128355	38128956	-	+
chr1	39367760	39368361	-	+
chr1	39368984	39369585	-	+
chr1	39374773	39375374	-	+
chr1	39544949	39545975	+	+
chr1	39546109	39546854	+	+
chr1	39548330	39549455	+	+
chr1	39575401	39576002	-	+
chr1	39576254	39577396	-	+
chr1	39901226	39901827	-	+
chr1	39902998	39904273	+	+
chr1	39904362	39904963	-	+
chr1	39905329	39905930	-	+
chr1	39948217	39948818	-	+
chr1	39958971	39959572	-	+
chr1	39961940	39962541	-	+
chr1	39962994	39963893	-	+
chr1	39964436	39965037	-	+
chr1	39965367	39965968	-	+
chr1	39967479	39968080	-	+
chr1	39969492	39970093	-	+
chr1	39970474	39971075	-	+
chr1	39971164	39971765	-	+
chr1	39972258	39973403	-	+
chr1	39974471	39975553	-	+
chr1	39976264	39976865	-	+
chr1	39977740	39978341	-	+
chr1	39980356	39981509	-	+
chr1	39981651	39982252	-	+
chr1	39982592	39983235	+	+
chr1	39986234	39986835	-	+
chr1	39987743	39988344	-	+
chr1	39989209	39989810	-	+
chr1	39991543	39993011	+	+
chr1	39995915	39996516	-	+
chr1	39998396	39998997	-	+
chr1	40001428	40002029	-	+
chr1	40003298	40003899	-	+
chr1	40007166	40007767	-	+
chr1	40010512	40011113	-	+
chr1	40013600	40015236	-	+
chr1	40016903	40017504	-	+
chr1	40017996	40018597	-	+
chr1	40023394	40023995	-	+
chr1	40027088	40027955	+	+
chr1	40029935	40031337	+	+
chr1	40033439	40034040	-	+
chr1	40035351	40036351	-	+
chr1	40037505	40038106	-	+
chr1	40266476	40267077	-	+
chr1	40280392	40280993	-	+
chr1	40296002	40296603	-	+
chr1	40297221	40297822	-	+
chr1	40298788	40299389	-	+
chr1	40299858	40300459	-	+
chr1	40300557	40301158	-	+
chr1	40301356	40301957	-	+
chr1	40303156	40303757	-	+
chr1	40309902	40310503	-	+
chr1	40310940	40311541	-	+
chr1	40313737	40314338	-	+
chr1	40315100	40316026	-	+
chr1	40316134	40316735	-	+
chr1	40317457	40318058	-	+
chr1	40442191	40442792	-	+
chr1	40448797	40449398	-	+
chr1	40457887	40458488	-	+
chr1	40458717	40459318	-	+
chr1	40459788	40460389	-	+
chr1	40460937	40462026	-	+
chr1	40462589	40463190	-	+
chr1	40463611	40464212	-	+
chr1	40464321	40465512	-	+
chr1	40465537	40466138	-	+
chr1	43115082	43115683	-	+
chr1	43118206	43118902	+	+
chr1	43120794	43121668	-	+
chr1	43127915	43128516	-	+
chr1	43934394	43934995	-	+
chr1	43935167	43935768	-	+
chr1	43936129	43936730	-	+
chr1	43959201	43959802	-	+
chr1	44004177	44004778	-	+
chr1	44009824	44011283	+	+
chr1	44011767	44013842	+	+
chr1	44016624	44017634	-	+
chr1	44018727	44019328	-	+
chr1	44019517	44020118	-	+
chr1	44020237	44020838	-	+
chr1	45361344	45361945	-	+
chr1	45365261	45365862	-	+
chr1	45472253	45472854	-	+
chr1	45814789	45815390	-	+
chr1	45815449	45816109	+	+
chr1	45824170	45825178	-	+
chr1	46852679	46853422	+	+
chr1	51476736	51477337	-	+
chr1	51915439	51916040	-	+
chr1	52161602	52162203	-	+
chr1	52166860	52167461	-	+
chr1	52167519	52169206	+	+
chr1	52170627	52171576	+	+
chr1	52172548	52173662	+	+
chr1	52176275	52176880	+	+
chr1	52178605	52179733	+	+
chr1	52179881	52180695	+	+
chr1	52181790	52182847	-	+
chr1	52184445	52185046	-	+
chr1	52185794	52186395	-	+
chr1	52190250	52190851	-	+
chr1	52194898	52195499	-	+
chr1	52196117	52196718	-	+
chr1	52196853	52198006	+	+
chr1	52208932	52209533	-	+
chr1	52209677	52210278	-	+
chr1	52227601	52228202	-	+
chr1	52230519	52231120	-	+
chr1	52232716	52233317	-	+
chr1	52453837	52454438	-	+
chr1	53783964	53784565	-	+
chr1	53784636	53785237	-	+
chr1	54044623	54045224	-	+
chr1	54978316	54979288	+	+
chr1	54979517	54980217	+	+
chr1	54980279	54981448	+	+
chr1	54981697	54982298	-	+
chr1	54982955	54983556	-	+
chr1	54985148	54986727	+	+
chr1	54987719	54988320	-	+
chr1	54988865	54989645	+	+
chr1	54989665	54990266	-	+
chr1	54990810	54992325	+	+
chr1	54992736	54994016	+	+
chr1	54998540	54999141	-	+
chr1	55002090	55003254	-	+
chr1	55003945	55004968	+	+
chr1	55007736	55009222	+	+
chr1	55012354	55013346	+	+
chr1	55016295	55017140	+	+
chr1	55019489	55020382	+	+
chr1	55020556	55021157	-	+
chr1	55022716	55023396	+	+
chr1	55024022	55024957	-	+
chr1	55025363	55025964	-	+
chr1	55025991	55027214	+	+
chr1	55053530	55054131	-	+
chr1	55073059	55073660	-	+
chr1	55076761	55077589	+	+
chr1	55081445	55082156	+	+
chr1	55086900	55087955	+	+
chr1	55088743	55089968	+	+
chr1	55157002	55158507	+	+
chr1	55161727	55162328	-	+
chr1	56972580	56973181	-	+
chr1	58391116	58391717	-	+
chr1	58393487	58394331	+	+
chr1	58394935	58395536	-	+
chr1	58399035	58399636	-	+
chr1	58408177	58408778	-	+
chr1	58412246	58412867	+	+
chr1	58413221	58414278	+	+
chr1	58414330	58415054	+	+
chr1	58415154	58415841	+	+
chr1	58416015	58416616	-	+
chr1	58416857	58417458	-	+
chr1	58418016	58418617	-	+
chr1	58420235	58420836	-	+
chr1	58422485	58423086	-	+
chr1	58456342	58457802	-	+
chr1	58460068	58461456	+	+
chr1	58651824	58652425	-	+
chr1	58652527	58653128	-	+
chr1	58711408	58712009	-	+
chr1	58713417	58714018	-	+
chr1	58714172	58714773	-	+
chr1	58761509	58762110	-	+
chr1	59668301	59668902	-	+
chr1	59669308	59669909	-	+
chr1	59670724	59671325	-	+
chr1	59685306	59686129	+	+
chr1	59687088	59687689	-	+
chr1	59688495	59689096	-	+
chr1	59698779	59699380	-	+
chr1	59700056	59700966	+	+
chr1	59701103	59702664	+	+
chr1	59703893	59705357	+	+
chr1	59705461	59706165	+	+
chr1	59706447	59707101	+	+
chr1	59710721	59711944	+	+
chr1	59713283	59713884	-	+
chr1	59715024	59715625	-	+
chr1	59720072	59720673	-	+
chr1	59721739	59722340	-	+
chr1	59723587	59724791	+	+
chr1	59762809	59763410	-	+
chr1	59886513	59887114	-	+
chr1	60074935	60075609	+	+
chr1	60342775	60343384	+	+
chr1	63177018	63177619	-	+
chr1	63180782	63181689	+	+
chr1	63183062	63183663	-	+
chr1	63596239	63596979	+	+
chr1	63598258	63598859	-	+
chr1	64028049	64028650	-	+
chr1	64028826	64029427	-	+
chr1	64069622	64070223	-	+
chr1	64071414	64072015	-	+
chr1	64120956	64121557	-	+
chr1	64121760	64122381	+	+
chr1	64532841	64533442	-	+
chr1	64533856	64534457	-	+
chr1	64535345	64535946	-	+
chr1	64616097	64616698	-	+
chr1	64617183	64617784	-	+
chr1	64690912	64691513	-	+
chr1	64791090	64791691	-	+
chr1	64993760	64994388	+	+
chr1	71557179	71557780	-	+
chr1	71577726	71579042	-	+
chr1	71583832	71584433	-	+
chr1	71601498	71602099	-	+
chr1	71605113	71606295	+	+
chr1	71614759	71615360	-	+
chr1	71626772	71627615	+	+
chr1	71637743	71638344	-	+
chr1	71640231	71640832	-	+
chr1	71650762	71651898	+	+
chr1	71652448	71653351	+	+
chr1	71653531	71654132	-	+
chr1	72226395	72227012	+	+
chr1	72243851	72244738	+	+
chr1	72254531	72255644	+	+
chr1	72711260	72711861	-	+
chr1	72713786	72714387	-	+
chr1	72715029	72715791	+	+
chr1	74265287	74265888	-	+
chr1	74266838	74268024	+	+
chr1	74277269	74278384	+	+
chr1	74278911	74279884	+	+
chr1	74280745	74282489	+	+
chr1	74282509	74283659	-	+
chr1	74400676	74401277	-	+
chr1	74429447	74430048	-	+
chr1	74430291	74431087	+	+
chr1	74505029	74505630	-	+
chr1	74506587	74507206	+	+
chr1	74533036	74534134	+	+
chr1	74534910	74535511	-	+
chr1	74535694	74536295	-	+
chr1	74562123	74562724	-	+
chr1	74705217	74705818	-	+
chr1	74706013	74706614	-	+
chr1	74706856	74707457	-	+
chr1	74707975	74708576	-	+
chr1	74709326	74709927	-	+
chr1	75190201	75190802	-	+
chr1	75192645	75193625	+	+
chr1	75236411	75237012	-	+
chr1	75237273	75237874	-	+
chr1	75239763	75240364	-	+
chr1	75240568	75241169	-	+
chr1	75241639	75242240	-	+
chr1	75243809	75244410	-	+
chr1	75244530	75246083	+	+
chr1	75246485	75247133	+	+
chr1	75248481	75249082	-	+
chr1	75249213	75249814	-	+
chr1	75250180	75250781	-	+
chr1	78658669	78659270	-	+
chr1	79696108	79697068	+	+
chr1	80255646	80256247	-	+
chr1	80256664	80257265	-	+
chr1	80258552	80259215	+	+
chr1	80260118	80260830	+	+
chr1	80263573	80264507	+	+
chr1	80268095	80268696	-	+
chr1	80335683	80336627	-	+
chr1	80337984	80338585	-	+
chr1	80338984	80340564	+	+
chr1	82901237	82901838	-	+
chr1	82901954	82902697	+	+
chr1	82906409	82907092	+	+
chr1	82909492	82911011	+	+
chr1	82911530	82912858	+	+
chr1	82915054	82916248	+	+
chr1	84719123	84719763	+	+
chr1	84720477	84721120	+	+
chr1	84721980	84722581	-	+
chr1	84768410	84769075	+	+
chr1	86072942	86073543	-	+
chr1	86074845	86075446	-	+
chr1	86075740	86076939	-	+
chr1	86090986	86091587	-	+
chr1	86102883	86103484	-	+
chr1	86104640	86105241	-	+
chr1	86115711	86116561	+	+
chr1	86134927	86135528	-	+
chr1	86139690	86140566	+	+
chr1	86140622	86141223	-	+
chr1	86141308	86141909	-	+
chr1	86142234	86144184	+	+
chr1	86154013	86154614	-	+
chr1	86337556	86338157	-	+
chr1	86342690	86343291	-	+
chr1	86435268	86435869	-	+
chr1	86440589	86441522	-	+
chr1	86443984	86444585	-	+
chr1	86470921	86471698	+	+
chr1	86471883	86472502	+	+
chr1	86487685	86488770	+	+
chr1	86525706	86526308	+	+
chr1	86530903	86532058	+	+
chr1	86624132	86624733	-	+
chr1	87214928	87215529	-	+
chr1	87228803	87229404	-	+
chr1	87230271	87230872	-	+
chr1	87232929	87233983	+	+
chr1	87234599	87235200	-	+
chr1	87235699	87236300	-	+
chr1	87236609	87237477	+	+
chr1	87238346	87238947	-	+
chr1	87240943	87241628	+	+
chr1	87242961	87243676	+	+
chr1	87243712	87244313	-	+
chr1	87245038	87245639	-	+
chr1	87327509	87328110	-	+
chr1	87456523	87457437	+	+
chr1	87458635	87459236	-	+
chr1	87792494	87793095	-	+
chr1	87793338	87794302	+	+
chr1	87794606	87795279	+	+
chr1	87934345	87934946	-	+
chr1	87940001	87940961	+	+
chr1	87941102	87942313	+	+
chr1	87945397	87948174	+	+
chr1	87950154	87951603	+	+
chr1	87952409	87953010	-	+
chr1	87953011	87953612	-	+
chr1	88103267	88103868	-	+
chr1	90215800	90216401	-	+
chr1	90764951	90766018	-	+
chr1	90768313	90768914	-	+
chr1	90768946	90770706	-	+
chr1	90783062	90783663	-	+
chr1	90784868	90785469	-	+
chr1	90785713	90786314	-	+
chr1	90787641	90788242	-	+
chr1	90788432	90789033	-	+
chr1	90789860	90790461	-	+
chr1	90794695	90795296	-	+
chr1	90796388	90796989	-	+
chr1	90797424	90798025	-	+
chr1	90799116	90799717	-	+
chr1	90801929	90802530	-	+
chr1	90813207	90813808	-	+
chr1	90826630	90827231	-	+
chr1	91136098	91136699	-	+
chr1	91136900	91137863	-	+
chr1	91323310	91323911	-	+
chr1	91364862	91365463	-	+
chr1	91366773	91367822	-	+
chr1	91368452	91369053	-	+
chr1	91372178	91373083	+	+
chr1	91375701	91376302	-	+
chr1	91458458	91459059	-	+
chr1	91814621	91815222	-	+
chr1	91816751	91817352	-	+
chr1	91819690	91820291	-	+
chr1	91820292	91820893	-	+
chr1	91822526	91823127	-	+
chr1	91823208	91824104	-	+
chr1	91824565	91825166	-	+
chr1	91826135	91826736	-	+
chr1	91828572	91829173	-	+
chr1	91834362	91834963	-	+
chr1	91835655	91836256	-	+
chr1	91839161	91839762	-	+
chr1	91840582	91841682	-	+
chr1	91848705	91849306	-	+
chr1	91851146	91851747	-	+
chr1	91853018	91853619	-	+
chr1	91856953	91857554	-	+
chr1	91861388	91861989	-	+
chr1	91862367	91863389	-	+
chr1	91864235	91864836	-	+
chr1	92063588	92064189	-	+
chr1	92437570	92438171	-	+
chr1	92857266	92857867	-	+
chr1	92860625	92861615	+	+
chr1	92861771	92862852	-	+
chr1	92864688	92865289	-	+
chr1	92867581	92868182	-	+
chr1	93235702	93236303	-	+
chr1	93263757	93264358	-	+
chr1	93266299	93266900	-	+
chr1	93267153	93267754	-	+
chr1	93270536	93271137	-	+
chr1	93272142	93272743	-	+
chr1	93273229	93273830	-	+
chr1	93274984	93275585	-	+
chr1	93276609	93277483	+	+
chr1	93277905	93278506	-	+
chr1	93278848	93279449	-	+
chr1	93280553	93282241	+	+
chr1	93282947	93283548	-	+
chr1	93285284	93285885	-	+
chr1	93286007	93286608	-	+
chr1	93287323	93287924	-	+
chr1	93288903	93290035	-	+
chr1	93290665	93291266	-	+
chr1	93293624	93294225	-	+
chr1	93294879	93295480	-	+
chr1	93295488	93296413	+	+
chr1	93296688	93297289	-	+
chr1	93298014	93298615	-	+
chr1	93299469	93300428	+	+
chr1	93301840	93302577	+	+
chr1	93399553	93400154	-	+
chr1	93402996	93403597	-	+
chr1	93404194	93404903	+	+
chr1	93406280	93407609	+	+
chr1	93410187	93410788	-	+
chr1	93410948	93411549	-	+
chr1	93415855	93416456	-	+
chr1	93416702	93417303	-	+
chr1	93417762	93418363	-	+
chr1	93427017	93427618	-	+
chr1	93444556	93446284	+	+
chr1	93479247	93479848	-	+
chr1	93511186	93512083	+	+
chr1	93615303	93616259	-	+
chr1	93617439	93618112	+	+
chr1	93618671	93619648	-	+
chr1	93619712	93621152	+	+
chr1	93804284	93804885	-	+
chr1	105747703	105748304	-	+
chr1	105989122	105989723	-	+
chr1	105989761	105990362	-	+
chr1	106758906	106759740	+	+
chr1	106759891	106760574	+	+
chr1	106760896	106761913	+	+
chr1	106762220	106763320	+	+
chr1	106764325	106765358	+	+
chr1	106767868	106768469	-	+
chr1	106794357	106794958	-	+
chr1	118293131	118294605	+	+
chr1	118294839	118295934	+	+
chr1	118331398	118332287	+	+
chr1	118334140	118335279	+	+
chr1	118338638	118340360	-	+
chr1	118494267	118494868	-	+
chr1	118611742	118612521	+	+
chr1	118613722	118614323	-	+
chr1	120223604	120224205	-	+
chr1	120235938	120236539	-	+
chr1	121554284	121555189	-	+
chr1	125388219	125389288	-	+
chr1	125390375	125391519	+	+
chr1	125398395	125398996	-	+
chr1	125559730	125560454	+	+
chr1	125560914	125561515	-	+
chr1	127807200	127808201	+	+
chr1	127869887	127870488	-	+
chr1	127944556	127945299	+	+
chr1	127948474	127949075	-	+
chr1	128244098	128244699	-	+
chr1	128245003	128246189	-	+
chr1	128330057	128331324	+	+
chr1	128339223	128340434	+	+
chr1	128356999	128357600	-	+
chr1	128357676	128358277	-	+
chr1	128359088	128359963	+	+
chr1	128416440	128417347	+	+
chr1	130716060	130716766	+	+
chr1	131040503	131041657	-	+
chr1	131042293	131042894	-	+
chr1	131045694	131046295	-	+
chr1	131048908	131049509	-	+
chr1	131049745	131050346	-	+
chr1	131051459	131052060	-	+
chr1	131052779	131053380	-	+
chr1	131060571	131061172	-	+
chr1	131082536	131083137	-	+
chr1	131087254	131087855	-	+
chr1	131091228	131091829	-	+
chr1	131092405	131093577	-	+
chr1	131093995	131094596	-	+
chr1	131094802	131095403	-	+
chr1	131095910	131096511	-	+
chr1	131911095	131911896	+	+
chr1	131933746	131934902	-	+
chr1	131936448	131937049	-	+
chr1	131937578	131938179	-	+
chr1	131938491	131939092	-	+
chr1	131942549	131943150	-	+
chr1	131943225	131943826	-	+
chr1	131944168	131945124	-	+
chr1	131946211	131946812	-	+
chr1	132006488	132007089	-	+
chr1	132007531	132008132	-	+
chr1	132008165	132008766	-	+
chr1	132009724	132010325	-	+
chr1	132010718	132011319	-	+
chr1	132106585	132107186	-	+
chr1	132107750	132108771	-	+
chr1	132109115	132110156	-	+
chr1	132291817	132292418	-	+
chr1	132977069	132977866	+	+
chr1	132978410	132979011	-	+
chr1	132981727	132982328	-	+
chr1	132982758	132984356	-	+
chr1	132989368	132990324	+	+
chr1	133130298	133131276	+	+
chr1	133131680	133132281	-	+
chr1	133133200	133134832	+	+
chr1	133137999	133139225	+	+
chr1	133139240	133139841	-	+
chr1	133140283	133141439	+	+
chr1	133613613	133614248	+	+
chr1	133614693	133615747	+	+
chr1	133616231	133616832	-	+
chr1	133617412	133618013	-	+
chr1	133619090	133619691	-	+
chr1	133636559	133637759	+	+
chr1	133641074	133642229	+	+
chr1	133644794	133645395	-	+
chr1	133645947	133646620	+	+
chr1	133650584	133652258	+	+
chr1	133652394	133652995	-	+
chr1	133653184	133654064	+	+
chr1	133655157	133655849	+	+
chr1	133658087	133659896	+	+
chr1	134078562	134079163	-	+
chr1	134098414	134099015	-	+
chr1	134099479	134100080	-	+
chr1	134337612	134338213	-	+
chr1	134338778	134339379	-	+
chr1	134343216	134344154	+	+
chr1	134344252	134344856	+	+
chr1	134359636	134360237	-	+
chr1	134362104	134362705	-	+
chr1	134405798	134406525	+	+
chr1	134406697	134407298	-	+
chr1	134407488	134408527	+	+
chr1	134408564	134409920	+	+
chr1	134433739	134434476	+	+
chr1	134435198	134436059	+	+
chr1	134493658	134494259	-	+
chr1	134634732	134635333	-	+
chr1	134635383	134635984	-	+
chr1	134636182	134637468	+	+
chr1	134638343	134638944	-	+
chr1	134639439	134640040	-	+
chr1	134640410	134641011	-	+
chr1	134749721	134750322	-	+
chr1	134955364	134956073	+	+
chr1	135146861	135147462	-	+
chr1	135290934	135291962	+	+
chr1	135295122	135296613	+	+
chr1	135373010	135373611	-	+
chr1	135374745	135375844	-	+
chr1	135378068	135378669	-	+
chr1	135380174	135380775	-	+
chr1	135381685	135382286	-	+
chr1	135383042	135383643	-	+
chr1	135395448	135396049	-	+
chr1	135431977	135432578	-	+
chr1	135433193	135433794	-	+
chr1	135596349	135596950	-	+
chr1	136262205	136262806	-	+
chr1	136263450	136264051	-	+
chr1	136264545	136265146	-	+
chr1	136414687	136415288	-	+
chr1	138478305	138478906	-	+
chr1	138479339	138480111	+	+
chr1	138480595	138481196	-	+
chr1	138481305	138481906	-	+
chr1	138567114	138567715	-	+
chr1	138570976	138571577	-	+
chr1	138571935	138572536	-	+
chr1	139453754	139454626	+	+
chr1	143596055	143596656	-	+
chr1	143598092	143598793	+	+
chr1	143601972	143602592	+	+
chr1	144000149	144000750	-	+
chr1	144001021	144002126	-	+
chr1	144002928	144003529	-	+
chr1	144003744	144004345	-	+
chr1	144004546	144005147	-	+
chr1	149825889	149826490	-	+
chr1	149827432	149828033	-	+
chr1	149828177	149828778	-	+
chr1	149849784	149850385	-	+
chr1	149854498	149855099	-	+
chr1	149858191	149858792	-	+
chr1	149861953	149862554	-	+
chr1	149862738	149863339	-	+
chr1	149873011	149873612	-	+
chr1	149896534	149897135	-	+
chr1	149936697	149937298	-	+
chr1	149959865	149960466	-	+
chr1	150098369	150098970	-	+
chr1	150102309	150102910	-	+
chr1	150162276	150162877	-	+
chr1	150441393	150441994	-	+
chr1	151343811	151344412	-	+
chr1	151344801	151345402	-	+
chr1	151348605	151349206	-	+
chr1	151353219	151353820	-	+
chr1	151353830	151354431	-	+
chr1	151355730	151356331	-	+
chr1	151356785	151357386	-	+
chr1	151358200	151358819	+	+
chr1	151361506	151362140	+	+
chr1	151362524	151363692	-	+
chr1	151365871	151366590	+	+
chr1	151366862	151367463	-	+
chr1	151368435	151369188	+	+
chr1	151369228	151369829	-	+
chr1	151460238	151460839	-	+
chr1	152508299	152509487	-	+
chr1	152829083	152829684	-	+
chr1	152832229	152832830	-	+
chr1	152835252	152835853	-	+
chr1	152843231	152843861	+	+
chr1	152844864	152845532	+	+
chr1	152903442	152904182	+	+
chr1	153211090	153211691	-	+
chr1	153212411	153213012	-	+
chr1	153213366	153213967	-	+
chr1	153215689	153216320	+	+
chr1	153216767	153217979	+	+
chr1	153218151	153218752	-	+
chr1	153219178	153220143	+	+
chr1	153230270	153230871	-	+
chr1	153258778	153259461	+	+
chr1	153267068	153267709	+	+
chr1	153267924	153268687	+	+
chr1	153274508	153275109	-	+
chr1	153290597	153291198	-	+
chr1	153291707	153292308	-	+
chr1	153333298	153333899	-	+
chr1	153441902	153442503	-	+
chr1	153443555	153445171	+	+
chr1	153445266	153445867	-	+
chr1	153452940	153453719	+	+
chr1	153457269	153457870	-	+
chr1	153460244	153460845	-	+
chr1	153461093	153461694	-	+
chr1	153462104	153462705	-	+
chr1	153462966	153463567	-	+
chr1	153464134	153465062	-	+
chr1	153465158	153465759	-	+
chr1	153466764	153467365	-	+
chr1	153471213	153471814	-	+
chr1	153486335	153486942	+	+
chr1	155075520	155076121	-	+
chr1	155092584	155093185	-	+
chr1	155093302	155093903	-	+
chr1	155096421	155097022	-	+
chr1	155207031	155207632	-	+
chr1	155208182	155210518	+	+
chr1	155211160	155211761	-	+
chr1	155211770	155212814	-	+
chr1	155213167	155213768	-	+
chr1	155214081	155214682	-	+
chr1	155215693	155216294	-	+
chr1	155217746	155218347	-	+
chr1	156422774	156423956	-	+
chr1	156425029	156425630	-	+
chr1	156617098	156617699	-	+
chr1	156639826	156640427	-	+
chr1	156648418	156649507	+	+
chr1	156650476	156651092	+	+
chr1	156654682	156655855	+	+
chr1	156656394	156656995	-	+
chr1	156657913	156659117	+	+
chr1	156659580	156660203	+	+
chr1	157082536	157083137	-	+
chr1	159233037	159233638	-	+
chr1	159271013	159271614	-	+
chr1	159272456	159273057	-	+
chr1	159344966	159345567	-	+
chr1	159346182	159346783	-	+
chr1	159348004	159348605	-	+
chr1	159351339	159351940	-	+
chr1	159357206	159357807	-	+
chr1	159358390	159358991	-	+
chr1	160211013	160211715	+	+
chr1	160211902	160212930	+	+
chr1	160213434	160215070	+	+
chr1	160970118	160970719	-	+
chr1	160971218	160971819	-	+
chr1	160973243	160973844	-	+
chr1	160976630	160977955	+	+
chr1	160978037	160978638	-	+
chr1	161039352	161039953	-	+
chr1	161042714	161043315	-	+
chr1	161043321	161043922	-	+
chr1	161235570	161236171	-	+
chr1	161238959	161239608	+	+
chr1	161239764	161240365	-	+
chr1	161241084	161241966	-	+
chr1	161243882	161245665	-	+
chr1	161246472	161247073	-	+
chr1	161249756	161250357	-	+
chr1	161814451	161815052	-	+
chr1	162075575	162076176	-	+
chr1	162216077	162216678	-	+
chr1	162223380	162223981	-	+
chr1	162224089	162224690	-	+
chr1	162603956	162604557	-	+
chr1	162607719	162608320	-	+
chr1	162665657	162666321	+	+
chr1	162666356	162666957	-	+
chr1	162667529	162668130	-	+
chr1	162669582	162670183	-	+
chr1	162671225	162671889	+	+
chr1	162672431	162673505	+	+
chr1	162674321	162675060	+	+
chr1	162675329	162676478	+	+
chr1	162678138	162679264	-	+
chr1	162679596	162680197	-	+
chr1	162682546	162683715	-	+
chr1	162685124	162685725	-	+
chr1	162685795	162686501	+	+
chr1	162688097	162688698	-	+
chr1	162688993	162689594	-	+
chr1	162691700	162692742	+	+
chr1	162693872	162694965	-	+
chr1	162735544	162736145	-	+
chr1	162736321	162736922	-	+
chr1	162737475	162738076	-	+
chr1	162738131	162738732	-	+
chr1	162738894	162739495	-	+
chr1	162739869	162740470	-	+
chr1	163241789	163242390	-	+
chr1	163243685	163244286	-	+
chr1	163277693	163278294	-	+
chr1	163280557	163281158	-	+
chr1	163291395	163291996	-	+
chr1	163301273	163301874	-	+
chr1	163302090	163302691	-	+
chr1	163304560	163305161	-	+
chr1	163308351	163308952	-	+
chr1	163309557	163310660	-	+
chr1	163311070	163311671	-	+
chr1	163361642	163362243	-	+
chr1	163379540	163380141	-	+
chr1	163382142	163383037	+	+
chr1	163383448	163384600	-	+
chr1	163385641	163386242	-	+
chr1	163387111	163387712	-	+
chr1	165460517	165461118	-	+
chr1	166001424	166002025	-	+
chr1	167219170	167219771	-	+
chr1	167220881	167221482	-	+
chr1	167221650	167222251	-	+
chr1	167222453	167223471	+	+
chr1	167269642	167270424	+	+
chr1	167277991	167278866	+	+
chr1	167279327	167280628	+	+
chr1	167282219	167283419	+	+
chr1	167283574	167284266	+	+
chr1	167284341	167284942	-	+
chr1	167307568	167308734	+	+
chr1	168150898	168151499	-	+
chr1	168169045	168169646	-	+
chr1	168247628	168248229	-	+
chr1	168253017	168253618	-	+
chr1	168283166	168283767	-	+
chr1	168287824	168288425	-	+
chr1	168290489	168291090	-	+
chr1	168305574	168306175	-	+
chr1	168320159	168320760	-	+
chr1	168330341	168330942	-	+
chr1	168335155	168335756	-	+
chr1	168337426	168338027	-	+
chr1	168360695	168361296	-	+
chr1	168371769	168372370	-	+
chr1	168373302	168373903	-	+
chr1	168374021	168374622	-	+
chr1	168375239	168375840	-	+
chr1	168390238	168390839	-	+
chr1	168392791	168393392	-	+
chr1	168401845	168402446	-	+
chr1	168403175	168403776	-	+
chr1	168416942	168417543	-	+
chr1	169948533	169949134	-	+
chr1	169968735	169969336	-	+
chr1	169969685	169970286	-	+
chr1	169972058	169972659	-	+
chr1	169973465	169974612	-	+
chr1	169974927	169975528	-	+
chr1	169975921	169976522	-	+
chr1	170008552	170009153	-	+
chr1	170025304	170025905	-	+
chr1	170043397	170043998	-	+
chr1	170106539	170107140	-	+
chr1	170108301	170108902	-	+
chr1	170109126	170110255	-	+
chr1	170136190	170136791	-	+
chr1	170136798	170137399	-	+
chr1	170139505	170140106	-	+
chr1	170140467	170141068	-	+
chr1	170173930	170174531	-	+
chr1	170702163	170702764	-	+
chr1	170703323	170704420	+	+
chr1	170706573	170707174	-	+
chr1	171344249	171345579	+	+
chr1	171345649	171346250	-	+
chr1	171502205	171502890	+	+
chr1	172084718	172085319	-	+
chr1	172123341	172124403	+	+
chr1	172125606	172126207	-	+
chr1	172138949	172140623	+	+
chr1	172148077	172148769	+	+
chr1	172150606	172151207	-	+
chr1	172188946	172189547	-	+
chr1	172202407	172203314	+	+
chr1	172203407	172204540	+	+
chr1	172206137	172206738	-	+
chr1	172209460	172210061	-	+
chr1	172213606	172214207	-	+
chr1	172500510	172501654	+	+
chr1	172511518	172512119	-	+
chr1	172512540	172513141	-	+
chr1	172513796	172514397	-	+
chr1	174831241	174831842	-	+
chr1	174832658	174833259	-	+
chr1	174835943	174836544	-	+
chr1	174837849	174838450	-	+
chr1	174839071	174839672	-	+
chr1	174840731	174841332	-	+
chr1	174841488	174842089	-	+
chr1	174842641	174843810	-	+
chr1	174845274	174845875	-	+
chr1	174845963	174846564	-	+
chr1	174846625	174847785	-	+
chr1	174848191	174849268	-	+
chr1	174850576	174851177	-	+
chr1	174851889	174852490	-	+
chr1	174854615	174855216	-	+
chr1	174856416	174857017	-	+
chr1	174858898	174860017	-	+
chr1	174860157	174860758	-	+
chr1	174861241	174861842	-	+
chr1	174861852	174862453	-	+
chr1	174862830	174863431	-	+
chr1	174863795	174864396	-	+
chr1	174864754	174866262	-	+
chr1	174866519	174867120	-	+
chr1	174867616	174868217	-	+
chr1	174868221	174868822	-	+
chr1	174871458	174872059	-	+
chr1	174872320	174872921	-	+
chr1	174873315	174873916	-	+
chr1	174874922	174875523	-	+
chr1	174877741	174878342	-	+
chr1	174878952	174879553	-	+
chr1	174882110	174882711	-	+
chr1	174885780	174886381	-	+
chr1	174886995	174887596	-	+
chr1	174889507	174890480	-	+
chr1	174892283	174892884	-	+
chr1	174892907	174893508	-	+
chr1	174897359	174897960	-	+
chr1	174900389	174900990	-	+
chr1	174918757	174919358	-	+
chr1	174919575	174920176	-	+
chr1	176722428	176723029	-	+
chr1	176724006	176724607	-	+
chr1	176725209	176726065	+	+
chr1	176727526	176729473	+	+
chr1	177756487	177757088	-	+
chr1	177757560	177758161	-	+
chr1	177761828	177762670	+	+
chr1	177795003	177795604	-	+
chr1	177795818	177796419	-	+
chr1	178260971	178261572	-	+
chr1	178326769	178327370	-	+
chr1	178338284	178339041	+	+
chr1	178405760	178406528	+	+
chr1	179545221	179545822	-	+
chr1	179742324	179742925	-	+
chr1	179742998	179743742	+	+
chr1	179743954	179745075	+	+
chr1	179745170	179745772	+	+
chr1	179767386	179767987	-	+
chr1	179768220	179768821	-	+
chr1	179772183	179773309	+	+
chr1	179777422	179778023	-	+
chr1	179802798	179803399	-	+
chr1	180168993	180169594	-	+
chr1	180754389	180756113	+	+
chr1	180756310	180756911	-	+
chr1	180757395	180758385	+	+
chr1	180801262	180802069	+	+
chr1	180803196	180803823	+	+
chr1	180804552	180805153	-	+
chr1	180805205	180805806	-	+
chr1	180809906	180811022	+	+
chr1	180811647	180812248	-	+
chr1	180812411	180813018	+	+
chr1	180852554	180853155	-	+
chr1	180867511	180869097	+	+
chr1	180978727	180979619	-	+
chr1	181085014	181085615	-	+
chr1	181086940	181088738	+	+
chr1	181150833	181151532	+	+
chr1	181170210	181170811	-	+
chr1	181171705	181172747	+	+
chr1	181174677	181175804	+	+
chr1	181176526	181177329	+	+
chr1	181177803	181178510	+	+
chr1	181179305	181179907	+	+
chr1	181181114	181181715	-	+
chr1	181181782	181182383	-	+
chr1	181182682	181183283	-	+
chr1	181183907	181184654	+	+
chr1	181184725	181185577	+	+
chr1	181185585	181186186	-	+
chr1	181186315	181186916	-	+
chr1	181188737	181189432	+	+
chr1	181199068	181199840	+	+
chr1	181807523	181808124	-	+
chr1	181808552	181809153	-	+
chr1	181810016	181810617	-	+
chr1	181812316	181812962	+	+
chr1	181891924	181892525	-	+
chr1	181893387	181894461	+	+
chr1	181895185	181895786	-	+
chr1	181896376	181896977	-	+
chr1	181897371	181897972	-	+
chr1	181898463	181899591	-	+
chr1	181900713	181901314	-	+
chr1	182125545	182126146	-	+
chr1	182410192	182410793	-	+
chr1	182464119	182464720	-	+
chr1	182465886	182466576	+	+
chr1	182466852	182467453	-	+
chr1	182468896	182469497	-	+
chr1	182470027	182470628	-	+
chr1	182472573	182473174	-	+
chr1	182474429	182475506	-	+
chr1	182475779	182476916	+	+
chr1	182477241	182478309	+	+
chr1	182514953	182515554	-	+
chr1	183328698	183329299	-	+
chr1	183333741	183334342	-	+
chr1	183344962	183346153	+	+
chr1	183346817	183347418	-	+
chr1	183413901	183415519	+	+
chr1	184033160	184034193	-	+
chr1	184034579	184035180	-	+
chr1	184036116	184037312	-	+
chr1	184075821	184076422	-	+
chr1	184076911	184077512	-	+
chr1	185283178	185284610	+	+
chr1	185285111	185285712	-	+
chr1	185287080	185287681	-	+
chr1	185289156	185290283	+	+
chr1	185362234	185362835	-	+
chr1	185363139	185363877	+	+
chr1	185364767	185365368	-	+
chr1	185386465	185387066	-	+
chr1	185387385	185388566	-	+
chr1	185388658	185389259	-	+
chr1	185389648	185390249	-	+
chr1	185391793	185392394	-	+
chr1	185398122	185398723	-	+
chr1	185414482	185415083	-	+
chr1	185428788	185429389	-	+
chr1	185429613	185430568	+	+
chr1	185430982	185431583	-	+
chr1	186116605	186117206	-	+
chr1	186715074	186715675	-	+
chr1	189727540	189728141	-	+
chr1	189870767	189871368	-	+
chr1	189874473	189875074	-	+
chr1	189875951	189877108	+	+
chr1	189877492	189878097	+	+
chr1	189880985	189881586	-	+
chr1	189882614	189883215	-	+
chr1	189883441	189884042	-	+
chr1	189884754	189885355	-	+
chr1	189885445	189886379	-	+
chr1	191182317	191182918	-	+
chr1	191224345	191224946	-	+
chr1	191531805	191532406	-	+
chr1	191534708	191535439	+	+
chr1	191555854	191556455	-	+
chr1	191556626	191557720	+	+
chr1	191559588	191560303	+	+
chr1	191560882	191561483	-	+
chr1	191563688	191564559	+	+
chr1	191566557	191567158	-	+
chr1	191568018	191569191	+	+
chr1	191569529	191570130	-	+
chr1	191570436	191571649	+	+
chr1	191572493	191573094	-	+
chr1	191574789	191575437	+	+
chr1	191576599	191577200	-	+
chr1	191577347	191577948	-	+
chr1	191622681	191623396	+	+
chr1	191623891	191625501	+	+
chr1	191625938	191626539	-	+
chr1	191784374	191784975	-	+
chr1	191785629	191786230	-	+
chr1	193099669	193100270	-	+
chr1	193102551	193103500	+	+
chr1	193103635	193104236	-	+
chr1	194818022	194818623	-	+
chr10	68157069	68157670	-	+
chr10	79691253	79693474	+	+
chr10	7470804	7471405	-	+
chr10	69336390	69337770	+	+
chr10	75890249	75890850	-	+
chr10	128450136	128450737	-	+
chr10	11173741	11174738	+	+
chr10	11288124	11288725	-	+
chr10	14745065	14746162	+	+
chr10	18022263	18022864	-	+
chr10	29343313	29344689	+	+
chr10	31604678	31605279	-	+
chr10	33914326	33914927	-	+
chr10	56377324	56379052	+	+
chr10	57507693	57508802	+	+
chr10	61423039	61423758	+	+
chr10	62946775	62947382	+	+
chr10	68091411	68092037	+	+
chr10	68107703	68108304	-	+
chr10	68124061	68124986	+	+
chr10	68222603	68223204	-	+
chr10	68255176	68255777	-	+
chr10	75317021	75317622	-	+
chr10	75643991	75645089	+	+
chr10	76594768	76595369	-	+
chr10	78397284	78397885	-	+
chr10	80067590	80069273	+	+
chr10	80150303	80151510	+	+
chr10	80379833	80380490	+	+
chr10	80412507	80413258	+	+
chr10	80560025	80560626	-	+
chr10	80575977	80577174	-	+
chr10	80788511	80789891	+	+
chr10	81117025	81117626	-	+
chr10	81149406	81150354	+	+
chr10	81362367	81362968	-	+
chr10	82902726	82903327	-	+
chr10	83606775	83608305	+	+
chr10	85900956	85901557	-	+
chr10	93257624	93258717	+	+
chr10	96631818	96633112	+	+
chr10	103562942	103563543	-	+
chr10	111492462	111493173	+	+
chr10	111509279	111509880	-	+
chr10	117112414	117113015	-	+
chr10	117800400	117801001	-	+
chr10	122912532	122913133	-	+
chr10	127286476	127287537	+	+
chr10	127598532	127599133	-	+
chr10	128253156	128254222	+	+
chr10	128778208	128779205	-	+
chr10	128875971	128876572	-	+
chr10	3972636	3973746	-	+
chr10	3973797	3974409	+	+
chr10	3978306	3978907	-	+
chr10	3978967	3979568	-	+
chr10	4388114	4388814	+	+
chr10	4391575	4392176	-	+
chr10	4395437	4396102	+	+
chr10	4396611	4397212	-	+
chr10	4397312	4397913	-	+
chr10	5286069	5286670	-	+
chr10	5287539	5288140	-	+
chr10	5289089	5289690	-	+
chr10	7211759	7212750	-	+
chr10	7662622	7663223	-	+
chr10	7681419	7682020	-	+
chr10	7714012	7714613	-	+
chr10	7718354	7719308	+	+
chr10	7720039	7720640	-	+
chr10	7720715	7721316	-	+
chr10	7722062	7722663	-	+
chr10	7723308	7723909	-	+
chr10	7764987	7765747	+	+
chr10	7766937	7767724	+	+
chr10	7769053	7770310	+	+
chr10	7902506	7903107	-	+
chr10	7903682	7904318	+	+
chr10	7907005	7907606	-	+
chr10	7911094	7911695	-	+
chr10	7953416	7954017	-	+
chr10	7956492	7957113	+	+
chr10	10557556	10558157	-	+
chr10	11281989	11282590	-	+
chr10	11285089	11285690	-	+
chr10	11287208	11287809	-	+
chr10	11298244	11298845	-	+
chr10	11300400	11301101	+	+
chr10	11301126	11301727	-	+
chr10	11302079	11302680	-	+
chr10	11302909	11303601	+	+
chr10	11303770	11304770	+	+
chr10	11306532	11307641	+	+
chr10	11310430	11311031	-	+
chr10	11312226	11312827	-	+
chr10	12379137	12379778	+	+
chr10	12869234	12869835	-	+
chr10	14151698	14152834	-	+
chr10	17723715	17724316	-	+
chr10	17726138	17726781	+	+
chr10	20310900	20311501	-	+
chr10	20312742	20313655	+	+
chr10	20335290	20336206	+	+
chr10	20336631	20337890	+	+
chr10	20338081	20339039	+	+
chr10	20339267	20340090	+	+
chr10	20347549	20348204	+	+
chr10	20349433	20350034	-	+
chr10	20350259	20350860	-	+
chr10	20351566	20352167	-	+
chr10	20951403	20952004	-	+
chr10	21775781	21776382	-	+
chr10	21777025	21777626	-	+
chr10	21784957	21785558	-	+
chr10	21962459	21963060	-	+
chr10	21968969	21969570	-	+
chr10	21969869	21970470	-	+
chr10	21973697	21974298	-	+
chr10	21975127	21975728	-	+
chr10	21997617	21998218	-	+
chr10	22306197	22306798	-	+
chr10	22307054	22307655	-	+
chr10	22308021	22308622	-	+
chr10	22308770	22309371	-	+
chr10	22322404	22323005	-	+
chr10	22731575	22732176	-	+
chr10	23778280	23778881	-	+
chr10	23779014	23779615	-	+
chr10	23783906	23784507	-	+
chr10	24597713	24599793	+	+
chr10	24909957	24910558	-	+
chr10	28074671	28075272	-	+
chr10	28597071	28597672	-	+
chr10	29360260	29360861	-	+
chr10	29361278	29361879	-	+
chr10	30518788	30520141	+	+
chr10	31606465	31607066	-	+
chr10	31607186	31607787	-	+
chr10	31608254	31608855	-	+
chr10	33916304	33916905	-	+
chr10	34146869	34148407	+	+
chr10	34148448	34149807	+	+
chr10	34206624	34207225	-	+
chr10	37002316	37003043	+	+
chr10	37003077	37004643	+	+
chr10	37136723	37137456	+	+
chr10	37137989	37138590	-	+
chr10	37139914	37140515	-	+
chr10	39654083	39654824	+	+
chr10	39654827	39656308	+	+
chr10	39659337	39659938	-	+
chr10	39732132	39732733	-	+
chr10	39849151	39849752	-	+
chr10	40219457	40220725	+	+
chr10	40257519	40258162	+	+
chr10	40258418	40259326	+	+
chr10	40275713	40276314	-	+
chr10	40276330	40276931	-	+
chr10	40278092	40278693	-	+
chr10	40280850	40281451	-	+
chr10	40283594	40284254	+	+
chr10	40284457	40285774	+	+
chr10	40286701	40287302	-	+
chr10	40297966	40298840	+	+
chr10	40299208	40299876	+	+
chr10	40300730	40301337	+	+
chr10	40349409	40350010	-	+
chr10	42180234	42180864	+	+
chr10	42182388	42182989	-	+
chr10	42183210	42184861	+	+
chr10	42276766	42277636	+	+
chr10	42277637	42278660	+	+
chr10	42502223	42502824	-	+
chr10	42544333	42544934	-	+
chr10	42761610	42762211	-	+
chr10	42763204	42763989	-	+
chr10	42764193	42765263	-	+
chr10	42769655	42770256	-	+
chr10	42833854	42834455	-	+
chr10	42834569	42835626	+	+
chr10	42835963	42836564	-	+
chr10	42838161	42838762	-	+
chr10	42838853	42839454	-	+
chr10	43220294	43220895	-	+
chr10	43478136	43478978	+	+
chr10	43479150	43479751	-	+
chr10	43479820	43480421	-	+
chr10	43579296	43579897	-	+
chr10	45075521	45076122	-	+
chr10	45077768	45078369	-	+
chr10	45122135	45122736	-	+
chr10	45166338	45166939	-	+
chr10	50591393	50591994	-	+
chr10	50859599	50860200	-	+
chr10	50863114	50863715	-	+
chr10	52418602	52419203	-	+
chr10	52439255	52440232	+	+
chr10	53596262	53597627	+	+
chr10	53598751	53599524	+	+
chr10	53615787	53617022	+	+
chr10	53629323	53629924	-	+
chr10	57486922	57487523	-	+
chr10	57505882	57506483	-	+
chr10	57509112	57510080	-	+
chr10	57511702	57512303	-	+
chr10	57512655	57513864	+	+
chr10	57516928	57517934	+	+
chr10	57531170	57531771	-	+
chr10	57532019	57532620	-	+
chr10	58321893	58322494	-	+
chr10	58324862	58325463	-	+
chr10	58369254	58369855	-	+
chr10	58387869	58388470	-	+
chr10	58426187	58427341	+	+
chr10	58429479	58430080	-	+
chr10	58430122	58430723	-	+
chr10	58432564	58433165	-	+
chr10	58434427	58435028	-	+
chr10	58446024	58446625	-	+
chr10	58446787	58447963	-	+
chr10	58448006	58449056	-	+
chr10	58449141	58449742	-	+
chr10	58451289	58451890	-	+
chr10	58455926	58456527	-	+
chr10	58456559	58457160	-	+
chr10	58457200	58457801	-	+
chr10	58458908	58459509	-	+
chr10	58459851	58460452	-	+
chr10	58460847	58461448	-	+
chr10	58461576	58462177	-	+
chr10	58477884	58478520	+	+
chr10	58485413	58486014	-	+
chr10	58491719	58492320	-	+
chr10	58495024	58495625	-	+
chr10	58495834	58496518	+	+
chr10	58497724	58498325	+	+
chr10	59323229	59323830	-	+
chr10	59366289	59366890	-	+
chr10	59367678	59368279	-	+
chr10	59376694	59377295	-	+
chr10	59378260	59378861	-	+
chr10	59379519	59380120	-	+
chr10	59578115	59578973	-	+
chr10	59579611	59580212	-	+
chr10	59951289	59951926	+	+
chr10	60277652	60278253	-	+
chr10	60305722	60306323	-	+
chr10	60306450	60307051	-	+
chr10	60307902	60308503	-	+
chr10	60308666	60309267	-	+
chr10	60309515	60310116	-	+
chr10	61419542	61420699	+	+
chr10	61420959	61421560	-	+
chr10	61423782	61424972	+	+
chr10	61425056	61426196	-	+
chr10	61450296	61450897	-	+
chr10	61452095	61452696	-	+
chr10	61648875	61649476	-	+
chr10	61680763	61681364	-	+
chr10	61693501	61694545	+	+
chr10	61737496	61738199	+	+
chr10	62428032	62428764	+	+
chr10	62448393	62448994	-	+
chr10	62449165	62449766	-	+
chr10	62450400	62451001	-	+
chr10	62486039	62486640	-	+
chr10	62576996	62577597	-	+
chr10	62578543	62580314	+	+
chr10	62580385	62581488	+	+
chr10	62581591	62582192	-	+
chr10	62582805	62583406	-	+
chr10	62584177	62584778	-	+
chr10	62585506	62586107	-	+
chr10	62587811	62588756	-	+
chr10	62589048	62589649	-	+
chr10	62589920	62591531	-	+
chr10	62591861	62592462	-	+
chr10	62593572	62594173	-	+
chr10	62594506	62595107	-	+
chr10	62595520	62596121	-	+
chr10	62597230	62597831	-	+
chr10	62599552	62600153	-	+
chr10	62614409	62615010	-	+
chr10	62627363	62627964	-	+
chr10	62628888	62629489	-	+
chr10	62650714	62651315	-	+
chr10	62737399	62738000	-	+
chr10	62738884	62740026	+	+
chr10	62740425	62741026	-	+
chr10	62755748	62756349	-	+
chr10	62760670	62761376	+	+
chr10	62767239	62767840	-	+
chr10	62767859	62768488	+	+
chr10	62774901	62775502	-	+
chr10	62791339	62791940	-	+
chr10	62997270	62997871	-	+
chr10	63007850	63008901	+	+
chr10	63016966	63017649	+	+
chr10	63022641	63023795	+	+
chr10	63024311	63024912	-	+
chr10	63298463	63299064	-	+
chr10	63325510	63326271	+	+
chr10	63328674	63329618	+	+
chr10	67096397	67098511	+	+
chr10	67098629	67099559	+	+
chr10	67126633	67127868	+	+
chr10	67185561	67186162	-	+
chr10	67186963	67188082	-	+
chr10	67188207	67190105	-	+
chr10	67190119	67190720	-	+
chr10	67252681	67253876	+	+
chr10	67257018	67258142	+	+
chr10	67259544	67261015	+	+
chr10	67284216	67284817	-	+
chr10	67537780	67538381	-	+
chr10	67538630	67539231	-	+
chr10	67885314	67885915	-	+
chr10	68087955	68088556	-	+
chr10	68095721	68096916	+	+
chr10	68098109	68099018	+	+
chr10	68099311	68100019	+	+
chr10	68100392	68101605	+	+
chr10	68101741	68103083	+	+
chr10	68103241	68104688	+	+
chr10	68105200	68106318	+	+
chr10	68106351	68106952	-	+
chr10	68107007	68107608	-	+
chr10	68108865	68110651	+	+
chr10	68111101	68111707	+	+
chr10	68111795	68112754	+	+
chr10	68113511	68114112	-	+
chr10	68114394	68114995	-	+
chr10	68115460	68116469	+	+
chr10	68116482	68117083	-	+
chr10	68117174	68118012	+	+
chr10	68118367	68119430	-	+
chr10	68119559	68120160	-	+
chr10	68120505	68121106	-	+
chr10	68121200	68121801	-	+
chr10	68121959	68122560	-	+
chr10	68122943	68123544	-	+
chr10	68126754	68127485	+	+
chr10	68130053	68130654	-	+
chr10	68130919	68131520	-	+
chr10	68131892	68132493	-	+
chr10	68133189	68133790	-	+
chr10	68134704	68135904	+	+
chr10	68136164	68136765	-	+
chr10	68137518	68138119	-	+
chr10	68139019	68140010	+	+
chr10	68142647	68143248	-	+
chr10	68144412	68145875	-	+
chr10	68148745	68149346	-	+
chr10	68151538	68152139	-	+
chr10	68152667	68153268	-	+
chr10	68153311	68153912	-	+
chr10	68155017	68155618	-	+
chr10	68158517	68159118	-	+
chr10	68160048	68160649	-	+
chr10	68163379	68163980	-	+
chr10	68165699	68166300	-	+
chr10	68167818	68168419	-	+
chr10	68171299	68171900	-	+
chr10	68174141	68175790	-	+
chr10	68176822	68177423	-	+
chr10	68177899	68178500	-	+
chr10	68180211	68180812	-	+
chr10	68181966	68182567	-	+
chr10	68183916	68184517	-	+
chr10	68186169	68186770	-	+
chr10	68187292	68187893	-	+
chr10	68188147	68188748	-	+
chr10	68195758	68196359	-	+
chr10	68198622	68199223	-	+
chr10	68216968	68217569	-	+
chr10	68218165	68218766	-	+
chr10	68219276	68219877	-	+
chr10	68220461	68221062	-	+
chr10	68221951	68222552	-	+
chr10	68223614	68224215	-	+
chr10	68249401	68250002	-	+
chr10	69211697	69212298	-	+
chr10	69212527	69213128	-	+
chr10	69325203	69325804	-	+
chr10	69326491	69327269	+	+
chr10	69331951	69333494	-	+
chr10	69333775	69334376	-	+
chr10	69334464	69335065	-	+
chr10	69335102	69335703	-	+
chr10	69337853	69338454	-	+
chr10	69338621	69340810	+	+
chr10	69350469	69351966	+	+
chr10	69604399	69605000	-	+
chr10	69607572	69608173	-	+
chr10	69608935	69609536	-	+
chr10	69611719	69612320	-	+
chr10	69617426	69618027	-	+
chr10	69644023	69644624	-	+
chr10	69654034	69654635	-	+
chr10	69669195	69669796	-	+
chr10	69678021	69678622	-	+
chr10	69682055	69682656	-	+
chr10	69757213	69757814	-	+
chr10	70018465	70019066	-	+
chr10	70027901	70028502	-	+
chr10	70029011	70029612	-	+
chr10	70030324	70030925	-	+
chr10	71252159	71252913	+	+
chr10	71347756	71348357	-	+
chr10	72653940	72654541	-	+
chr10	72655992	72657164	+	+
chr10	72664992	72665618	+	+
chr10	72667934	72668943	+	+
chr10	72671448	72672049	-	+
chr10	72673492	72674616	+	+
chr10	73268411	73269012	-	+
chr10	73326104	73326705	-	+
chr10	75120665	75121266	-	+
chr10	75173656	75174257	-	+
chr10	75189642	75190243	-	+
chr10	75313107	75314473	+	+
chr10	75314552	75315351	+	+
chr10	75318699	75319300	-	+
chr10	75535819	75537006	-	+
chr10	75538627	75539456	+	+
chr10	75539781	75540382	-	+
chr10	75642523	75643150	+	+
chr10	75645340	75645941	-	+
chr10	75646179	75647132	+	+
chr10	75667314	75667915	-	+
chr10	75856825	75857426	-	+
chr10	75857983	75859370	+	+
chr10	75859759	75860360	-	+
chr10	75888636	75889237	-	+
chr10	76032560	76033620	+	+
chr10	76442273	76442874	-	+
chr10	76549953	76550554	-	+
chr10	76551359	76551960	-	+
chr10	76553912	76554622	+	+
chr10	76554829	76555430	-	+
chr10	76557012	76557819	+	+
chr10	76589875	76590476	-	+
chr10	76591439	76592040	-	+
chr10	76596982	76597986	-	+
chr10	76599887	76600488	-	+
chr10	76602401	76603462	-	+
chr10	76603602	76604203	-	+
chr10	76604217	76604818	-	+
chr10	76605115	76605716	-	+
chr10	76605947	76607104	-	+
chr10	76704548	76705149	-	+
chr10	76705764	76706365	-	+
chr10	76706570	76707171	-	+
chr10	76708263	76708864	-	+
chr10	76710726	76711833	-	+
chr10	76713593	76714194	-	+
chr10	76750214	76750815	-	+
chr10	76751023	76751624	-	+
chr10	76752755	76753356	-	+
chr10	76753577	76754178	-	+
chr10	76756071	76756672	-	+
chr10	76758116	76758717	-	+
chr10	77054255	77056652	+	+
chr10	77481440	77482041	-	+
chr10	77482855	77483456	-	+
chr10	77483746	77484347	-	+
chr10	77622091	77623713	+	+
chr10	77648893	77649494	-	+
chr10	77651462	77652063	-	+
chr10	77653465	77654066	-	+
chr10	77982249	77983693	+	+
chr10	77985055	77985656	-	+
chr10	77986059	77986803	+	+
chr10	77992201	77992802	-	+
chr10	78183434	78184035	-	+
chr10	78184693	78185315	+	+
chr10	78395416	78396017	-	+
chr10	78396086	78397239	-	+
chr10	78398408	78399009	-	+
chr10	78425688	78426289	-	+
chr10	78574868	78575469	-	+
chr10	78575593	78576194	-	+
chr10	78583187	78586033	+	+
chr10	79048978	79049579	-	+
chr10	79057030	79057631	-	+
chr10	79058109	79058710	-	+
chr10	79058790	79059391	-	+
chr10	79059572	79060173	-	+
chr10	79061334	79061935	-	+
chr10	79096464	79097065	-	+
chr10	79536024	79536625	-	+
chr10	79682443	79683509	+	+
chr10	79690455	79691056	-	+
chr10	79693810	79694817	-	+
chr10	79694936	79695537	-	+
chr10	79705329	79705930	-	+
chr10	79713300	79713901	-	+
chr10	79715501	79716102	-	+
chr10	79717751	79718352	-	+
chr10	79751013	79751614	-	+
chr10	79864788	79865406	+	+
chr10	79903104	79903705	-	+
chr10	79958019	79958620	-	+
chr10	79960021	79960622	-	+
chr10	79967917	79968518	-	+
chr10	79971578	79972179	-	+
chr10	79972670	79973271	-	+
chr10	79973445	79974046	-	+
chr10	80054029	80054630	-	+
chr10	80061170	80063457	+	+
chr10	80064422	80065023	-	+
chr10	80065118	80065719	-	+
chr10	80066083	80067577	-	+
chr10	80069309	80070468	-	+
chr10	80071494	80072132	+	+
chr10	80072991	80073669	+	+
chr10	80074817	80075459	+	+
chr10	80129661	80130262	-	+
chr10	80133489	80134090	-	+
chr10	80134171	80135658	+	+
chr10	80136535	80138207	+	+
chr10	80138527	80139505	+	+
chr10	80142235	80143218	+	+
chr10	80143606	80144207	-	+
chr10	80144662	80145263	-	+
chr10	80147279	80148119	+	+
chr10	80148866	80149479	+	+
chr10	80155957	80156835	+	+
chr10	80157417	80158018	-	+
chr10	80159237	80159838	-	+
chr10	80160714	80161315	-	+
chr10	80167775	80168731	+	+
chr10	80244528	80245667	+	+
chr10	80261967	80262568	-	+
chr10	80264123	80264724	-	+
chr10	80266220	80266821	-	+
chr10	80267703	80268304	-	+
chr10	80268354	80268955	-	+
chr10	80269875	80270963	-	+
chr10	80276732	80277333	-	+
chr10	80284780	80285480	+	+
chr10	80286567	80287848	+	+
chr10	80287931	80288532	-	+
chr10	80290011	80290612	-	+
chr10	80293047	80293648	-	+
chr10	80295851	80296452	-	+
chr10	80296567	80297168	-	+
chr10	80383114	80383715	-	+
chr10	80384153	80384754	-	+
chr10	80385305	80386402	-	+
chr10	80388020	80388945	+	+
chr10	80397233	80398309	+	+
chr10	80398342	80398947	+	+
chr10	80406397	80406998	-	+
chr10	80407043	80408622	+	+
chr10	80408943	80409544	-	+
chr10	80410333	80410934	-	+
chr10	80415712	80416921	+	+
chr10	80417716	80418317	-	+
chr10	80419165	80419766	-	+
chr10	80540341	80541411	+	+
chr10	80561370	80561971	-	+
chr10	80566098	80566895	+	+
chr10	80573928	80574529	-	+
chr10	80574665	80575266	-	+
chr10	80577920	80578521	-	+
chr10	80578977	80579783	+	+
chr10	80642079	80642783	+	+
chr10	80642787	80643388	-	+
chr10	80643623	80644224	-	+
chr10	80644552	80645837	+	+
chr10	80646302	80646903	-	+
chr10	80647450	80648996	+	+
chr10	80649230	80649831	-	+
chr10	80676622	80677223	-	+
chr10	80701381	80701982	-	+
chr10	80703436	80704532	+	+
chr10	80704701	80705548	+	+
chr10	80708264	80708865	-	+
chr10	80709484	80710130	+	+
chr10	80714123	80716113	+	+
chr10	80716302	80717985	+	+
chr10	80751606	80752207	-	+
chr10	80755485	80756086	-	+
chr10	80756135	80756736	-	+
chr10	80756937	80757538	-	+
chr10	80779903	80780504	-	+
chr10	80781097	80781698	-	+
chr10	80782398	80782999	-	+
chr10	80783035	80783636	-	+
chr10	80784544	80785145	-	+
chr10	80785478	80786079	-	+
chr10	80786101	80787187	+	+
chr10	80787598	80788294	+	+
chr10	80791738	80792634	+	+
chr10	80793740	80794341	-	+
chr10	80797309	80797910	-	+
chr10	80829667	80830314	+	+
chr10	80831948	80832549	-	+
chr10	80899424	80900025	-	+
chr10	80900411	80901294	+	+
chr10	81038683	81039284	-	+
chr10	81039835	81040904	-	+
chr10	81041115	81041779	+	+
chr10	81086942	81087543	-	+
chr10	81088148	81088749	-	+
chr10	81105051	81105868	+	+
chr10	81105869	81106941	-	+
chr10	81106964	81108039	-	+
chr10	81108610	81109211	-	+
chr10	81109550	81110151	-	+
chr10	81111026	81111627	-	+
chr10	81111656	81112257	-	+
chr10	81113783	81115193	+	+
chr10	81115354	81116066	+	+
chr10	81117674	81118452	+	+
chr10	81118860	81119461	-	+
chr10	81120537	81122442	+	+
chr10	81123586	81124625	-	+
chr10	81125191	81126283	+	+
chr10	81126337	81126938	-	+
chr10	81128947	81130118	+	+
chr10	81130722	81131323	-	+
chr10	81132747	81133348	-	+
chr10	81139026	81139627	-	+
chr10	81139845	81140446	-	+
chr10	81141831	81142982	+	+
chr10	81146365	81146966	-	+
chr10	81151164	81151765	-	+
chr10	81152289	81152890	-	+
chr10	81153959	81154560	-	+
chr10	81155460	81156061	-	+
chr10	81156122	81157762	+	+
chr10	81157843	81158472	+	+
chr10	81159535	81160136	-	+
chr10	81160264	81160865	-	+
chr10	81265566	81266167	-	+
chr10	81266194	81266795	-	+
chr10	81319831	81320442	+	+
chr10	81321081	81321682	-	+
chr10	81323246	81323847	-	+
chr10	81326535	81327702	+	+
chr10	81357413	81358014	-	+
chr10	81359079	81359680	-	+
chr10	81360115	81361203	-	+
chr10	81363768	81364369	-	+
chr10	81364580	81365181	-	+
chr10	81365907	81366920	+	+
chr10	81384403	81385528	-	+
chr10	81388762	81389365	+	+
chr10	81390563	81391164	-	+
chr10	81391835	81392920	+	+
chr10	81393457	81394118	+	+
chr10	81394684	81395697	+	+
chr10	81395737	81396338	-	+
chr10	81397476	81398077	-	+
chr10	81398276	81398877	-	+
chr10	81482517	81483118	-	+
chr10	82159786	82160387	-	+
chr10	82354138	82354739	-	+
chr10	82629194	82629795	-	+
chr10	82630463	82631064	-	+
chr10	82652060	82653500	+	+
chr10	82653707	82654308	-	+
chr10	82655737	82656338	-	+
chr10	82657640	82658241	-	+
chr10	82762636	82763237	-	+
chr10	82858477	82859078	-	+
chr10	82859555	82860156	-	+
chr10	82863430	82864031	-	+
chr10	82864300	82865261	+	+
chr10	82865566	82866167	-	+
chr10	82877526	82878127	-	+
chr10	82878834	82879435	-	+
chr10	82880229	82881243	-	+
chr10	82882172	82882773	-	+
chr10	82887043	82887644	-	+
chr10	82888449	82889161	+	+
chr10	82889412	82890013	-	+
chr10	82890168	82891218	+	+
chr10	82891413	82892014	-	+
chr10	82892443	82893044	-	+
chr10	82894390	82894991	-	+
chr10	82895231	82895832	-	+
chr10	82898676	82899585	+	+
chr10	82901424	82902025	-	+
chr10	83576559	83577160	-	+
chr10	83603811	83604547	+	+
chr10	83605509	83606178	+	+
chr10	83610120	83611194	+	+
chr10	83611382	83612607	+	+
chr10	83613997	83615328	+	+
chr10	84369812	84370413	-	+
chr10	84520729	84521330	-	+
chr10	84521607	84522208	-	+
chr10	84522761	84523362	-	+
chr10	84523823	84524601	+	+
chr10	84528987	84529588	-	+
chr10	84530689	84531416	+	+
chr10	84532466	84533067	-	+
chr10	84533089	84533690	-	+
chr10	84534131	84535304	-	+
chr10	84576818	84577419	-	+
chr10	85023262	85023863	-	+
chr10	85103159	85103760	-	+
chr10	85107250	85107851	-	+
chr10	85108433	85109034	-	+
chr10	85109558	85110159	-	+
chr10	85111240	85111841	-	+
chr10	85113855	85114808	+	+
chr10	85117833	85119532	+	+
chr10	85121622	85122405	+	+
chr10	85889720	85890357	+	+
chr10	85890714	85892138	+	+
chr10	85894088	85895151	-	+
chr10	85896207	85896808	-	+
chr10	85936640	85938230	+	+
chr10	85938615	85939216	-	+
chr10	85939737	85940338	-	+
chr10	86317121	86317722	-	+
chr10	86318422	86319023	-	+
chr10	86319619	86320783	-	+
chr10	86321859	86322460	-	+
chr10	86323680	86324281	-	+
chr10	86324840	86325441	-	+
chr10	86325545	86326146	-	+
chr10	86327770	86328371	-	+
chr10	86329228	86329829	-	+
chr10	86330328	86330929	-	+
chr10	86331072	86331673	-	+
chr10	86332276	86332877	-	+
chr10	86333051	86333652	-	+
chr10	86334701	86335302	-	+
chr10	86338773	86339374	-	+
chr10	86348882	86349483	-	+
chr10	86349604	86351306	-	+
chr10	86352185	86353333	-	+
chr10	86689815	86690416	-	+
chr10	86691380	86692336	+	+
chr10	86692539	86693140	-	+
chr10	86839989	86840834	+	+
chr10	86845340	86845941	-	+
chr10	86850259	86850860	-	+
chr10	88738426	88739296	+	+
chr10	88741117	88741875	+	+
chr10	88745312	88746341	+	+
chr10	88747180	88747928	+	+
chr10	88750347	88750948	-	+
chr10	88751100	88751701	-	+
chr10	88755383	88755984	-	+
chr10	88811794	88812395	-	+
chr10	88814226	88814827	-	+
chr10	89744286	89744887	-	+
chr10	89744905	89745506	-	+
chr10	89746151	89746752	-	+
chr10	91114961	91115750	+	+
chr10	91116040	91116641	-	+
chr10	91116755	91117509	+	+
chr10	91118634	91119617	+	+
chr10	91121975	91122705	+	+
chr10	91137223	91137824	-	+
chr10	91139890	91140491	-	+
chr10	91141103	91142234	-	+
chr10	91142377	91142978	-	+
chr10	91143458	91144062	+	+
chr10	91145704	91146305	-	+
chr10	91170870	91171691	+	+
chr10	91171754	91172355	-	+
chr10	93159867	93160468	-	+
chr10	93160506	93161107	-	+
chr10	93161672	93162273	-	+
chr10	93232171	93232772	-	+
chr10	93233317	93233918	-	+
chr10	93235262	93235863	-	+
chr10	93239111	93239712	-	+
chr10	93240470	93241071	-	+
chr10	93242121	93242722	-	+
chr10	93244075	93244799	+	+
chr10	93245457	93246416	+	+
chr10	93246464	93247071	+	+
chr10	93249802	93250561	+	+
chr10	93256648	93257327	+	+
chr10	93258840	93260157	+	+
chr10	93260418	93261469	-	+
chr10	93261504	93262105	-	+
chr10	93271870	93272471	-	+
chr10	93274393	93274994	-	+
chr10	93278010	93279256	+	+
chr10	93284782	93286020	+	+
chr10	93286205	93286806	-	+
chr10	93287363	93288022	+	+
chr10	93587639	93588240	-	+
chr10	93588578	93589179	-	+
chr10	93851198	93852297	-	+
chr10	93853663	93854264	-	+
chr10	93854515	93855116	-	+
chr10	93855601	93856960	+	+
chr10	93858144	93858745	-	+
chr10	93858997	93859598	-	+
chr10	93860060	93861219	-	+
chr10	93864288	93864889	-	+
chr10	93872720	93873321	-	+
chr10	93875564	93876165	-	+
chr10	95515363	95515964	-	+
chr10	95538642	95539243	-	+
[truncated: 17,145 more rows]
