# Supplementary material for: The Paf1 complex positively regulates enhancer activity in mouse embryonic stem cells
Source: Life Sci Alliance. 2020 Dec 29;4(3):e202000792. doi: 10.26508/lsa.202000792 (PMC7772781; doi:10.26508/lsa.202000792)
Supplement: Supplementary file 6 [file LSA-2020-00792_TableS5.xlsx]

## Sheet: Enhancer activities
Name	Chromosome	start	end	Forward primer	Reverse primer
SE_No_Ctr9_1	chr18	40307814	40308552	CATCCAGAGACTACCCCACC	AAGATGGAGGGAGAGAGGGT
SE_No_Ctr9_2	chr6	83889802	83891103	GGGCAAACTCCAAACTGTGT	ACTGTGATCTGTCTCCTGTTATC
SE_No_Ctr9_3	chr18	75579020	75580044	GAAGACGGTGTTCACCAAGG	TTTATGTGAGCCGCCATCTG
SE_No_Ctr9_4	chr12	54306374	54307229	ATCTGTCTCATGGCGCCTAG	ATCTCTGTGTCAAACTGGCA
SE_No_Ctr9_5	chr7	49337359	49338213	GGCTTCTGTTTCCTGCTTCC	GGGCAAAGATCTTCAAAGTTCC
SE_No_Ctr9_6	chr11	66919784	66920891	TGGCAATGCACTAGAAGAAGA	TAGCAACCATTCAGACCCCA
SE_No_Ctr9_7	chr12	56284123	56285563	AGCAGGCTGGTGAAGTACAA	GGTTCACTGCCTTGGCTTC
SE_No_Ctr9_8	chr14	76624481	76625584	CTTTGCCCACTGAGCCATC	CGGGAGCCTAGACAAAATGC
SE_No_Ctr9_9	chrX	52752971	52754212	TGGAAGGAGCAGTGTGGAAA	CAGTATGGCAAGTCGGTGTG
SE_No_Ctr9_10	chr10	59957327	59958932	GGACAATTCTCACATGCGCA	TAGACTGATTGTGGGGTGGG
SE_No_Ctr9_11	chr6	31884516	31885470	ACTGTGTGTGCAATACTCCA	CAGACACACACACACTTCCC
SE_No_Ctr9_12	chr10	21087419	21088525	ATATCAGCACCCATTTCTTAGGT	TACTGCGTCCCTTGTAAGCT
SE_No_Ctr9_13	chr18	75584534	75585534	CCAGCCTGACAGAACAATGC	ATGCAGGGTTTAAAGCTGGG
SE_No_Ctr9_14	chr11	66932499	66933629	AGGGTCTATTGTGGGTGGTG	ACCTTGCCACTTACTCTCCC
SE_No_Ctr9_15	chr14	76629571	76630699	CTCCATCTTTGCTTCCTGGC	GAAACAGTCTGCACGTGTCC
SE_No_Ctr9_16	chrX	52759024	52760955	CCTACGGCCTCTGACATCAA	TGCCTCAGTTCAAGCTAAACG
SE_No_Ctr9_17	chr1	135198158	135199766	AGATTACAGATGCCACCCCT	AGAATGAGGGGAAGCTGTGG
SE_No_Ctr9_18	chr10	21109263	21110672	GGGAAAGAGAGAAGCTAAATCCA	TGCTGTGACACTGGTATCCC
SE_No_Ctr9_19	chr18	35043016	35044092	AGT TAG CTG TCA CTT GCC CA	CCC AAT CCA GGC TAA CGA GT
SE_No_Ctr9_20	chr12	12803349	12804574	CAC ACC ACT CAC ATG CAA CA	TGG CTA ACA TCT GAG GGT CA
SE_No_Ctr9_21	chr6	142510678	142512282	GTC AAA ACC TGG GCT GTG G	GGG TCA GAG AGT AAT GAA ACT GG
SE_No_Ctr9_22	chr2	71654991	71656941	TGT TTG GTG TGT GTG CAT GT	ACA CGG TGA AAG TTG TTG CA
SE_No_Ctr9_23	chr4	98845453	98846941	CAC CCG ACT AGA GTT GAG CA	TCA GCT GGT GTA TGG TCT CC
SE_No_Ctr9_24	chr19	21784177	21785717	GGC CCT GTG ATT GAA TAG CC	GAG TGA GTT TCA GGA CAG CC
SE_No_Ctr9_25	chr5	118509234	118510495	AAG AAG AGG TGA AGC TGG GG	TCG GCC TTG TAG ATA AAG TGC
SE_No_Ctr9_26	chr13	63979099	63980994	GCA AAA GGG TGT ACT GTG GG	CCT CCT TCC TGC CTG TCT TT
SE_No_Ctr9_27	chr12	56295936	56297530	AAT CAC AGG CCT ACA ACC CT	TAC GAG CCC TTA GAT CAC GG
SE_No_Ctr9_28	chr1	72213933	72215257	GAG TGC CAT GGT GAG GTG T	CCG TTT CCT TGA CCC TCA TG
SE_With_Ctr9_1	chr8	84650110	84650822	GGGAGAAAAGGGAAAGGGGA	ACGACCCATGCACATAAAGC
SE_With_Ctr9_2	chr15	88708520	88709544	TCCTGTACCATGCCTGTCTG	CCCTGCCGGTCTCTTAATCA
SE_With_Ctr9_3	chr10	40257956	40259155	GCCTCCACTTTTCATCCCAA	GCAGTGTCTTAATATTGCGACC
SE_With_Ctr9_4	chr1	180888354	180889637	AGAACAGTAGGCCGTGGAAA	GGGAATTGAGCTCAGGACCT
SE_With_Ctr9_5	chr7	13013758	13015191	AGAAGCACAGAGATCTCCCTC	CCTGCATGTGTTGGCCATAT
SE_With_Ctr9_6	chr7	80129891	80131304	AGGACCCAGATTTGATTCCCA	GACAAGCCAGAAACTAGCCG
SE_With_Ctr9_7	chr1	119304639	119306156	GGGGACTCAGGAAGCAGAAA	GTCACTCCCTGGCGATCTTA
SE_With_Ctr9_8	chr5	64864260	64865791	GGATCCAGGCTCAGTCCAAA	CGCCTCTTCTTGCTGGAAC
SE_With_Ctr9_9	chr4	130519455	130521116	TCCCCACCCCTGATAGAGAA	AACTCCAGCTCCAGAAGACC
SE_With_Ctr9_10	chr18	61627449	61629412	CCG TGC CTT TAG TCC CAG TA	GCA TTG ACC AAG CCA GTT CA
SE_With_Ctr9_11	chr1	180888163	180890063	TCT CAC TGG ACT GAC TGC TC	TTG CAG ATG TAC ACA GGG GA
SE_With_Ctr9_12	chr2	152176645	152178652	GGA TGC CTT CTC TGG ACT CT	GAG ATC TGA GAT GGC TGG GG
SE_With_Ctr9_13	chr14	55085351	55086792	TGC TGG CCC TAG TTT TCC AT	CCC TTA CCC TCT CCC TTT GG
SE_With_Ctr9_14	chr18	36253270	36255073	GGA GTC TTA GAG TAT GGG CCA	CCT AAG ACA TTG TGA GGC ATC A
SE_With_Ctr9_15	chr12	110471158	110473010	AGA GGA CCC AGA TTC AAG CC	AAC GGA GGA AGC AAG AGA CT
SE_With_Ctr9_16	chr3	96576493	96578120	TCT ATT CCT GTT CCC GGC TC	GGC TGG CCT TGA ATT TTG GA
SE_With_Ctr9_17	chr5	64864503	64865513	AGACAGCAACAGTGTACCCA	CAGGGGCTAGGTTCAGAACT
SE_With_Ctr9_18	chr1	119304850	119305862	CTCAGGTCAGGAGGTTGAGG	GCTGGCCTCTTTATCCCTGA
SE_With_Ctr9_19	chr14	55085541	55086605	TAGCGATGGAGATGAGGCTC	CCTCAGCCCTTCTCTTCCAA
SE_With_Ctr9_20	chr6	122662505	122664231	TGTGGAAAGGGAGAACTGACT	GCAGCACCTTCTCAGACAAA
SE_With_Ctr9_21	chr18	36253269	36254468	CCGACCTCTCCCTGCTTTTA	AGGAGTCTTAGAGTATGGGCC
