# Supplementary material for: The Paf1 complex positively regulates enhancer activity in mouse embryonic stem cells
Source: Life Sci Alliance. 2020 Dec 29;4(3):e202000792. doi: 10.26508/lsa.202000792 (PMC7772781; doi:10.26508/lsa.202000792)
Supplement: Supplementary file 9 [file LSA-2020-00792_TableS8.xlsx]

## Sheet: NIH-3T3_active_enhancers_based_
chr1	4858016	4859151
chr1	9545764	9546049
chr1	9942247	9944136
chr1	13659720	13660426
chr1	16103224	16104413
chr1	16105469	16105730
chr1	16618797	16619113
chr1	16656155	16656857
chr1	16688400	16688677
chr1	30872935	30873204
chr1	30948706	30950104
chr1	31680353	31680730
chr1	33756553	33758141
chr1	33908584	33908817
chr1	34044139	34044412
chr1	34150469	34150676
chr1	34801831	34802051
chr1	34842187	34842615
chr1	36555679	36558121
chr1	37996344	37997014
chr1	39367890	39368436
chr1	39575691	39575976
chr1	39576455	39577218
chr1	39901379	39903454
chr1	40266597	40266962
chr1	40439810	40446204
chr1	40446732	40447174
chr1	43128056	43128346
chr1	43934284	43934774
chr1	43935160	43935306
chr1	46852368	46853556
chr1	51477445	51478403
chr1	51915317	51915852
chr1	52231996	52233211
chr1	53784245	53784433
chr1	53784740	53785015
chr1	55026239	55027342
chr1	55052868	55053573
chr1	55086407	55087853
chr1	55088881	55089182
chr1	55162004	55162104
chr1	56972698	56972987
chr1	58391492	58394251
chr1	58422906	58424125
chr1	58460339	58460433
chr1	58651930	58653111
chr1	58710878	58712750
chr1	58713319	58713752
chr1	58714094	58714620
chr1	59669613	59670432
chr1	59670765	59671064
chr1	59685173	59685979
chr1	59762747	59763293
chr1	60342904	60343368
chr1	63177013	63177897
chr1	64121109	64121350
chr1	64121745	64123240
chr1	64532995	64534327
chr1	64615867	64616674
chr1	64617333	64618140
chr1	64691116	64691358
chr1	71557294	71557573
chr1	71650912	71651209
chr1	71652881	71653126
chr1	71653693	71654034
chr1	72244209	72244275
chr1	72254946	72255051
chr1	72711375	72711712
chr1	74285130	74285445
chr1	74505052	74505467
chr1	74506470	74507003
chr1	75192499	75193112
chr1	75236546	75237190
chr1	75237512	75237544
chr1	75247793	75248161
chr1	75248618	75248923
chr1	78658941	78659053
chr1	80339177	80340377
chr1	86064707	86065122
chr1	86154247	86154467
chr1	86358154	86359420
chr1	86359724	86360147
chr1	86434645	86435962
chr1	86440177	86443495
chr1	86471151	86471377
chr1	86472012	86472289
chr1	86487832	86488611
chr1	86525049	86526284
chr1	86526723	86529104
chr1	86622299	86623208
chr1	86624238	86624545
chr1	87214782	87215341
chr1	87327102	87328005
chr1	87792656	87792801
chr1	88103469	88103695
chr1	91458653	91459169
chr1	91815641	91816265
chr1	91816969	91817429
chr1	91823519	91823951
chr1	93235922	93236338
chr1	93270809	93271019
chr1	93305276	93305902
chr1	93444388	93446075
chr1	93478495	93480193
chr1	93511320	93512463
chr1	93804264	93804381
chr1	105989267	105990225
chr1	106758660	106759667
chr1	106760017	106760472
chr1	106795641	106796601
chr1	120235771	120236323
chr1	125390114	125390489
chr1	125560080	125560339
chr1	125561054	125561366
chr1	128244079	128245449
chr1	128357183	128359665
chr1	128416523	128417293
chr1	130716147	130718070
chr1	131082869	131083044
chr1	131096041	131096631
chr1	131910718	131912043
chr1	132006669	132009299
chr1	132010137	132010143
chr1	132010990	132011159
chr1	132292081	132292381
chr1	133130850	133131165
chr1	133131790	133134385
chr1	133134978	133135033
chr1	133660479	133660913
chr1	134077959	134079121
chr1	134098520	134098879
chr1	134099571	134100587
chr1	134362300	134362521
chr1	134405930	134407217
chr1	134955575	134955818
chr1	135146962	135147400
chr1	135374594	135375167
chr1	136414689	136415100
chr1	138571298	138572411
chr1	139453925	139454513
chr1	144003908	144004150
chr1	144004503	144004937
chr1	149862816	149863122
chr1	149960108	149960556
chr1	150098373	150099025
chr1	150100064	150101860
chr1	151343968	151344114
chr1	151344500	151345755
chr1	152903602	152904728
chr1	153267313	153267572
chr1	153291847	153292112
chr1	153333524	153333754
chr1	153486797	153487637
chr1	155075168	155076049
chr1	155092667	155093712
chr1	155095887	155099621
chr1	155215899	155216142
chr1	156615712	156618794
chr1	156639953	156640224
chr1	159233148	159233739
chr1	160210934	160211183
chr1	160211612	160212785
chr1	160213479	160214048
chr1	161035019	161038336
chr1	161038743	161039283
chr1	161039941	161040367
chr1	161248207	161251102
chr1	162075521	162076040
chr1	162216126	162216970
chr1	162217549	162222422
chr1	162223400	162223733
chr1	162224987	162225130
chr1	162738361	162739561
chr1	162739863	162740454
chr1	163280801	163280975
chr1	163291626	163291895
chr1	163302379	163302561
chr1	163308263	163308709
chr1	163309662	163311534
chr1	163361597	163362176
chr1	163379734	163380051
chr1	163380823	163384533
chr1	165460671	165460938
chr1	165642327	165642699
chr1	166001571	166001810
chr1	167269811	167270132
chr1	167283786	167284993
chr1	167308234	167308482
chr1	168390367	168390693
chr1	168392999	168393294
chr1	169968117	169970734
chr1	170008678	170008904
chr1	170043445	170043730
chr1	170108258	170110638
chr1	170137038	170137092
chr1	170174129	170174756
chr1	171344764	171346360
chr1	172148290	172149043
chr1	172205638	172206655
chr1	172500002	172502210
chr1	174845402	174845879
chr1	174874641	174875948
chr1	174882311	174882565
chr1	174918924	174919228
chr1	174919678	174920052
chr1	177794920	177796301
chr1	178316905	178320262
chr1	178320836	178321024
chr1	178321436	178322103
chr1	178322544	178322716
chr1	178335761	178338767
chr1	178405336	178406857
chr1	179545439	179545639
chr1	179802933	179803153
chr1	180812587	180812927
chr1	180813990	180814541
chr1	181151088	181151446
chr1	182515126	182515297
chr1	183345078	183346034
chr1	184033045	184034167
chr1	184034739	184034959
chr1	184036229	184036473
chr1	184077223	184077420
chr1	185204605	185204917
chr1	185362141	185362692
chr1	185363032	185364559
chr1	186116830	186117104
chr1	189727539	189728109
chr1	191182472	191183032
chr1	191224479	191225241
chr1	191574185	191575464
chr10	3972807	3974345
chr10	4388283	4389689
chr10	5287644	5289936
chr10	7211934	7212571
chr10	7470823	7471115
chr10	7662657	7663011
chr10	7681577	7681875
chr10	7956605	7956927
chr10	10557655	10558137
chr10	11281632	11282921
chr10	12869195	12869704
chr10	17723328	17726773
chr10	18021869	18022767
chr10	20311210	20313698
chr10	20347774	20348078
chr10	20951674	20951902
chr10	21775573	21776436
chr10	21777181	21777483
chr10	21784621	21785472
chr10	21991726	22001495
chr10	22306125	22306560
chr10	22307086	22307656
chr10	22731721	22731942
chr10	23785187	23787235
chr10	28074954	28075174
chr10	29361272	29361776
chr10	31607420	31607643
chr10	31608412	31608968
chr10	34206830	34207201
chr10	37136919	37138635
chr10	37140061	37140325
chr10	39659563	39659926
chr10	39732246	39732730
chr10	40256795	40258186
chr10	40300146	40301916
chr10	40349632	40350227
chr10	42277048	42277378
chr10	42278075	42278515
chr10	42502199	42502704
chr10	42761724	42762006
chr10	43220164	43221250
chr10	43477868	43478939
chr10	43479335	43480800
chr10	43579389	43579732
chr10	50591547	50592423
chr10	52418357	52419046
chr10	53597096	53597474
chr10	53629481	53629745
chr10	56377998	56379579
chr10	57487121	57487402
chr10	57531280	57532376
chr10	58322031	58322533
chr10	58445639	58446589
chr10	58446907	58447191
chr10	58447519	58447742
chr10	58497224	58498702
chr10	59323424	59324063
chr10	59578077	59578881
chr10	59579731	59579967
chr10	59951421	59951790
chr10	60277770	60279223
chr10	61452208	61452483
chr10	61648725	61649574
chr10	61680655	61681786
chr10	62448740	62448763
chr10	62449193	62449910
chr10	62450447	62450684
chr10	62486223	62486663
chr10	62577331	62577484
chr10	62577839	62578991
chr10	62601364	62602430
chr10	62650643	62651159
chr10	62791508	62791758
chr10	62947029	62947204
chr10	63022650	63024971
chr10	67096580	67098274
chr10	67098889	67099137
chr10	67126846	67127103
chr10	67185750	67186406
chr10	67187106	67187908
chr10	67284184	67284635
chr10	67537932	67538378
chr10	67538680	67539117
chr10	68088036	68088098
chr10	68103884	68104650
chr10	68105287	68105664
chr10	68134794	68135287
chr10	68136204	68137344
chr10	68155660	68157733
chr10	68165888	68166379
chr10	68168015	68168127
chr10	68249582	68249833
chr10	69212073	69212113
chr10	69212739	69213137
chr10	69350817	69351734
chr10	69611829	69612071
chr10	69654094	69654363
chr10	69757298	69757566
chr10	71347874	71348182
chr10	72653503	72656143
chr10	73325779	73326507
chr10	75120878	75121077
chr10	75667455	75667972
chr10	75859138	75860195
chr10	76032759	76033005
chr10	76442434	76442687
chr10	77622421	77623491
chr10	78184850	78185074
chr10	78425655	78426095
chr10	78575069	78576402
chr10	79096512	79097366
chr10	79682553	79682804
chr10	79852811	79857115
chr10	79960204	79960494
chr10	80053755	80055014
chr10	80071441	80072014
chr10	80072894	80073446
chr10	80074889	80075371
chr10	80138739	80138954
chr10	80142414	80143119
chr10	80147590	80153477
chr10	80158149	80159839
chr10	80160318	80161130
chr10	80167800	80168958
chr10	80262181	80262411
chr10	80264403	80264547
chr10	80291897	80293837
chr10	80385900	80387358
chr10	80387958	80388326
chr10	80397817	80398845
chr10	80406499	80406753
chr10	80407337	80407664
chr10	80560994	80562203
chr10	80575925	80577160
chr10	80578163	80579390
chr10	80676896	80677320
chr10	80701496	80701927
chr10	80702255	80703043
chr10	80751742	80751967
chr10	80755516	80756503
chr10	80756906	80757171
chr10	80796795	80799742
chr10	80826671	80827456
chr10	80899598	80899881
chr10	80900301	80900865
chr10	81105481	81106788
chr10	81129177	81129454
chr10	81139215	81139253
chr10	81139980	81140092
chr10	81142569	81142817
chr10	81146599	81147143
chr10	81266298	81266802
chr10	81319652	81320315
chr10	81320891	81322243
chr10	81357658	81358080
chr10	81384575	81385557
chr10	82354342	82354567
chr10	82629393	82629613
chr10	82630340	82631554
chr10	82762665	82763068
chr10	82858309	82861963
chr10	82863080	82863305
chr10	84531527	84533688
chr10	84534357	84534704
chr10	84576959	84577260
chr10	85103167	85104146
chr10	86327934	86328172
chr10	86330540	86331547
chr10	86332476	86332733
chr10	89744630	89746604
chr10	91122440	91123960
chr10	91171100	91172168
chr10	93159972	93160204
chr10	93160752	93161205
chr10	93161810	93162134
chr10	93287421	93288100
chr10	93588813	93589287
chr10	95515575	95515850
chr10	96616962	96622717
chr10	96623124	96623457
chr10	96627434	96629460
chr10	96632342	96633659
chr10	98914682	98914910
chr10	99261560	99262986
chr10	99263457	99266628
chr10	110920210	110920692
chr10	111298511	111299087
chr10	111473292	111474340
chr10	111505245	111506207
chr10	111506572	111507020
chr10	111509289	111509926
chr10	111516916	111517227
chr10	115314061	115315887
chr10	115383690	115384197
chr10	115385073	115385661
chr10	115387344	115387572
chr10	117062908	117064761
chr10	117376305	117376669
chr10	117709423	117710229
chr10	117846269	117846671
chr10	119239068	119239855
chr10	119240326	119241264
chr10	120400103	120401117
chr10	120401524	120402157
chr10	120402803	120403039
chr10	120417311	120417504
chr10	120421029	120424389
chr10	120425662	120426603
chr10	120460585	120462935
chr10	120464819	120466345
chr10	120469135	120469339
chr10	120475107	120475696
chr10	120477119	120477954
chr10	121366003	121366328
chr10	121585646	121587924
chr10	121625681	121625904
chr10	121739993	121740213
chr10	122890573	122892591
chr10	122910828	122912177
chr10	122912545	122912968
chr10	122982444	122985833
chr10	122986225	122987361
chr10	127062824	127063169
chr10	127063702	127064926
chr10	127069121	127071423
chr10	127073534	127073779
chr10	127289254	127290317
chr10	127290752	127292724
chr10	127311294	127311583
chr10	127500621	127500932
chr10	127521565	127522052
chr10	127596169	127597082
chr10	127597460	127597967
chr10	127599316	127599580
chr10	127600307	127600692
chr10	127621376	127621693
chr10	127661593	127662023
chr10	127662380	127662967
chr10	127666926	127668718
chr10	128035711	128037436
chr10	128038243	128038444
chr10	128058046	128061064
chr10	128253878	128254103
chr10	128302557	128303050
chr10	128322739	128323374
chr10	128337978	128338233
chr10	128368081	128369144
chr10	128492292	128493872
chr10	128495275	128495343
chr10	128546918	128549152
chr10	128625526	128626596
chr10	128747868	128748315
chr10	128778371	128779529
chr10	128804720	128805246
chr10	128911141	128911370
chr10	128919468	128919827
chr10	128920296	128923576
chr11	3247082	3248069
chr11	3265882	3266596
chr11	3289771	3290062
chr11	3337286	3337756
chr11	3515095	3515456
chr11	3647929	3648489
chr11	3649311	3650020
chr11	3908843	3908869
chr11	3913036	3913257
chr11	4160300	4161092
chr11	4161403	4161866
chr11	4187024	4187251
chr11	4308725	4308983
chr11	5097076	5097277
chr11	5097756	5100258
chr11	5520936	5522214
chr11	5707179	5707503
chr11	5761846	5762422
chr11	5861437	5863658
chr11	5864055	5864263
chr11	5877376	5878225
chr11	6414650	6417252
chr11	6526615	6528765
chr11	6547303	6547811
chr11	6624900	6625952
chr11	6680382	6680648
chr11	6681220	6681334
chr11	6698133	6698457
chr11	8466878	8467309
chr11	8624248	8624554
chr11	12035531	12035828
chr11	12036186	12036536
chr11	18878235	18878435
chr11	19924513	19926332
chr11	20201382	20202872
chr11	20248851	20249368
chr11	20331443	20332446
chr11	20531478	20532306
chr11	20632020	20632501
chr11	20632915	20633490
chr11	20740724	20741718
chr11	21091398	21092222
chr11	22990998	22991755
chr11	23305574	23306316
chr11	23306993	23307448
chr11	23497239	23497902
chr11	29172047	29174166
chr11	29546758	29548021
chr11	29692276	29692589
chr11	29693031	29694355
chr11	29734893	29735119
chr11	30267221	30267589
chr11	30771149	30771474
chr11	30772198	30772574
chr11	30772929	30773135
chr11	31369497	31369759
chr11	32348472	32348722
chr11	32455533	32456689
chr11	32643787	32644462
chr11	32647153	32647327
chr11	33161927	33163127
chr11	35769816	35770770
chr11	35833054	35834369
chr11	35838219	35839397
chr11	40692920	40694718
chr11	40734708	40734743
chr11	45852287	45853106
chr11	48800412	48802136
chr11	48816249	48816281
chr11	48817729	48818119
chr11	49203621	49203944
chr11	49712269	49712525
chr11	50209741	50211095
chr11	50212207	50212741
chr11	50251528	50252054
chr11	50275777	50275976
chr11	50290413	50292407
chr11	50324627	50325566
chr11	50377671	50378976
chr11	51263228	51264901
chr11	51583863	51585862
chr11	51605676	51607469
chr11	51619827	51621100
chr11	51625149	51625369
chr11	51635468	51635899
chr11	51755844	51756347
chr11	51999720	52000419
chr11	52098885	52100608
chr11	52232169	52232912
chr11	52396423	52396736
chr11	53298843	53300477
chr11	53300825	53301459
chr11	53350121	53352719
chr11	53429765	53430759
chr11	54061034	54061254
chr11	54438256	54439815
chr11	54521887	54522473
chr11	54522943	54523286
chr11	54866702	54867601
chr11	55417408	55419790
chr11	55428773	55428993
chr11	55468177	55469171
chr11	55469663	55470735
chr11	55503636	55503826
chr11	55505259	55506355
chr11	58008405	58008656
chr11	58009527	58010473
chr11	58954980	58956002
chr11	59207791	59208742
chr11	59226250	59228131
chr11	59505779	59506000
chr11	59663336	59664322
chr11	59808952	59809766
chr11	59838543	59839781
chr11	60105672	60106374
chr11	60219423	60219600
chr11	60351917	60352806
chr11	60537250	60538319
chr11	60728484	60728814
chr11	60776994	60778325
chr11	60877674	60877908
chr11	60878416	60878689
chr11	61174476	61174914
chr11	61504795	61505814
chr11	61761576	61761959
chr11	61854082	61855443
chr11	62282150	62282280
chr11	62457509	62458292
chr11	62549852	62552395
chr11	62601964	62604814
chr11	62822073	62822325
chr11	65787417	65787793
chr11	68851741	68853056
chr11	68901623	68902922
chr11	69073443	69073499
chr11	69095323	69098685
chr11	69099121	69100325
chr11	69125253	69125605
chr11	69394392	69395388
chr11	69396078	69397217
chr11	69408315	69411746
chr11	69415207	69415415
chr11	69417669	69418758
chr11	69419503	69420232
chr11	69580543	69582169
chr11	69663083	69663399
chr11	69665942	69666675
chr11	69670495	69672383
chr11	69672804	69673074
chr11	69758404	69759718
chr11	69845662	69846354
chr11	69900497	69901670
chr11	69914120	69914616
chr11	69919371	69921293
chr11	69990962	69991419
chr11	69991778	69992201
chr11	69995820	69996548
chr11	70014943	70015680
chr11	70018105	70018305
chr11	70018856	70019133
chr11	70019510	70019719
chr11	70020914	70021173
chr11	70028528	70028795
chr11	70052265	70052572
chr11	70188682	70189090
chr11	70189527	70189711
chr11	70190230	70190704
chr11	70210392	70211496
chr11	70646653	70646959
chr11	70647710	70648031
chr11	70651214	70651362
chr11	70652432	70652638
chr11	70653050	70653495
chr11	70654048	70654576
chr11	70667529	70667979
chr11	70668890	70669945
chr11	70982619	70983033
chr11	72441594	72442331
chr11	72607410	72608290
chr11	72689597	72691125
chr11	73177229	73178478
chr11	74722997	74724666
chr11	74771333	74771581
chr11	74829428	74833225
chr11	74837651	74837936
chr11	74926592	74927035
chr11	75168837	75169152
chr11	75170721	75171118
chr11	75173760	75174241
chr11	75459281	75461234
chr11	75461841	75463021
chr11	75463416	75463470
chr11	75630228	75630708
chr11	75631017	75631476
chr11	75651028	75651134
chr11	75651625	75651990
chr11	75653051	75653760
chr11	75680553	75680717
chr11	75732919	75734301
chr11	76216598	76216835
chr11	76217257	76217523
chr11	77513825	77514073
chr11	77686236	77688103
chr11	78032248	78032606
chr11	78163811	78165514
chr11	78166066	78166517
chr11	78177609	78179795
chr11	78182483	78183545
chr11	78188784	78189463
chr11	78536428	78536732
chr11	78537182	78537252
chr11	78549719	78549958
chr11	79252960	79254661
chr11	79704113	79704388
chr11	79711807	79712240
chr11	79736885	79737849
chr11	79738524	79739876
chr11	80383242	80384019
chr11	80428711	80430152
chr11	80476225	80476535
chr11	82781683	82782108
chr11	83271497	83271558
chr11	83472451	83474093
chr11	84043155	84043395
chr11	84179963	84180201
chr11	84818958	84819504
chr11	84828455	84829593
chr11	84868931	84870687
chr11	84871135	84871399
chr11	84879704	84880255
chr11	85140636	85141007
chr11	86256305	86258075
chr11	86356162	86356394
chr11	86484711	86485289
chr11	86571156	86571376
chr11	86577084	86577947
chr11	86578642	86579328
chr11	86580506	86586940
chr11	86587257	86587588
chr11	86683437	86684886
chr11	86756137	86757394
chr11	86757931	86759406
chr11	87109303	87110063
chr11	87422768	87422905
chr11	87426686	87426708
chr11	87443125	87443299
chr11	87448641	87448681
chr11	87462264	87462360
chr11	87471261	87471508
chr11	87590980	87591227
chr11	87592911	87593196
chr11	87736698	87737368
chr11	87986427	87986644
chr11	88047761	88049091
chr11	88052431	88052633
chr11	88204565	88205068
chr11	88954433	88955337
chr11	90638392	90638670
chr11	93885124	93886833
chr11	93954983	93956333
chr11	93967383	93968017
chr11	93994515	93995910
chr11	93996676	93997074
chr11	94211485	94212068
chr11	94320829	94321077
chr11	94321390	94321820
chr11	94629916	94630864
chr11	94653526	94654783
chr11	94936289	94937184
chr11	94937690	94938037
chr11	94946070	94946282
chr11	94948089	94948205
chr11	95258949	95259176
chr11	95309073	95310741
chr11	95414297	95414653
chr11	95414987	95415746
chr11	95859038	95859570
chr11	96789483	96790405
chr11	96822020	96822231
chr11	97186692	97187039
chr11	97188328	97188912
chr11	97206046	97206227
chr11	97206588	97207394
chr11	97207727	97208000
chr11	97208350	97208522
chr11	97309246	97311190
chr11	97415943	97416190
chr11	97435318	97436607
chr11	97450206	97451418
chr11	97744893	97745206
chr11	97780815	97782492
chr11	97801286	97801609
chr11	97840725	97840923
chr11	98026880	98027942
chr11	98202085	98204531
chr11	98438201	98438816
chr11	98772778	98773706
chr11	98774155	98775256
chr11	98775599	98777006
chr11	98836830	98837025
chr11	98960514	98960753
chr11	99229399	99230333
chr11	100319959	100321867
chr11	100413003	100413294
chr11	100416635	100416855
chr11	100472435	100472698
chr11	100712585	100712853
chr11	100961842	100964285
chr11	100964604	100964983
chr11	100967634	100970606
chr11	101082680	101083886
chr11	101278198	101278885
chr11	101442450	101443622
chr11	101465155	101465904
chr11	101552127	101552527
chr11	101552917	101553762
chr11	101627337	101627656
chr11	101628014	101628151
chr11	101641738	101641812
chr11	101645856	101645947
chr11	101658139	101658298
chr11	101772155	101772500
chr11	101807096	101807319
chr11	102155872	102156765
chr11	102189957	102190284
chr11	102218545	102218764
chr11	102248957	102249187
chr11	102295116	102295955
chr11	102309299	102309700
chr11	102318326	102318546
chr11	102407037	102408476
chr11	102465067	102467115
chr11	102467681	102467920
chr11	102881635	102881831
chr11	103051744	103052160
chr11	103114687	103114701
chr11	103115298	103115672
chr11	103116378	103117299
chr11	103131421	103132856
chr11	103696675	103697672
chr11	104440493	104441549
chr11	104442519	104443117
chr11	104550011	104550447
chr11	105182051	105182551
chr11	105182971	105183260
chr11	105282787	105283209
chr11	105292237	105293487
chr11	105293879	105294224
chr11	105438894	105439139
chr11	106159670	106160792
chr11	106216339	106217293
chr11	106500857	106502091
chr11	106778808	106779944
chr11	106787105	106789190
chr11	106919428	106919952
chr11	106998268	106999454
chr11	107028163	107028751
chr11	107130636	107130769
chr11	108215292	108216241
chr11	108217347	108217592
chr11	108217986	108218025
chr11	108267634	108269077
chr11	109610493	109610886
chr11	109650956	109651257
chr11	109651673	109652378
chr11	109670666	109671571
chr11	109672168	109672498
chr11	114668710	114670924
chr11	114673471	114673773
chr11	114675536	114676843
chr11	114723434	114723661
chr11	114725072	114725388
chr11	115412800	115413034
chr11	115413478	115413848
chr11	115513477	115514382
chr11	115708008	115708474
chr11	116011722	116011748
chr11	116023383	116024537
chr11	116030769	116031553
chr11	116167368	116168171
chr11	116168613	116168792
chr11	116434598	116434847
chr11	116533948	116534163
chr11	116671747	116672434
chr11	116851897	116854048
chr11	117318553	117319223
chr11	117809876	117810449
chr11	117810776	117811120
chr11	117822809	117823119
chr11	117823926	117825685
chr11	117826765	117826899
chr11	117968916	117969136
chr11	117986474	117987227
chr11	117987975	117988563
chr11	118248229	118248533
chr11	118248963	118249353
chr11	118288737	118290235
chr11	118290590	118291046
chr11	118324237	118324575
chr11	118326531	118328170
chr11	118328585	118328893
chr11	118352664	118353651
chr11	118354052	118354500
chr11	118354847	118355285
chr11	119299159	119299470
chr11	119913452	119913785
chr11	119943110	119943673
chr11	119944258	119944491
chr11	120098382	120098628
chr11	120099007	120099766
chr11	120149919	120150109
chr11	120150593	120150866
chr11	120378003	120378343
chr11	120378970	120379232
chr11	120491960	120492474
chr11	120673434	120674084
chr11	120713034	120713365
chr11	120713996	120714333
chr11	120799636	120801017
chr11	120822354	120824149
chr11	120990012	120990424
chr11	120990796	120991215
chr11	121237403	121237786
chr11	121259536	121259838
chr12	3426945	3427698
chr12	8498773	8500055
chr12	8500554	8500835
chr12	8675055	8675742
chr12	8771478	8771690
chr12	8772426	8772982
chr12	8920492	8923601
chr12	9030475	9030809
chr12	15814619	15815376
chr12	16532061	16533483
chr12	17544932	17546112
chr12	21373307	21374392
chr12	21416453	21417522
chr12	24651433	24651744
chr12	25094549	25094825
chr12	28634502	28635869
chr12	28675818	28676481
chr12	31948598	31950308
chr12	32819375	32819599
chr12	36156305	36156638
chr12	40220457	40220632
chr12	40221506	40223238
chr12	44209466	44210103
chr12	49383909	49384190
chr12	49385067	49385809
chr12	51377555	51378150
chr12	51690851	51691841
chr12	55490300	55491816
chr12	55492248	55492620
chr12	59011281	59011562
chr12	59130380	59131237
chr12	65036369	65036614
chr12	69158110	69158697
chr12	69184270	69184905
chr12	69985794	69986172
chr12	70975389	70975626
chr12	71014909	71015168
chr12	72084146	72084282
chr12	72084851	72085120
chr12	72760509	72761117
chr12	72762006	72762244
chr12	73286192	73286503
chr12	73286833	73287225
chr12	75670387	75670817
chr12	75700777	75701051
chr12	75701775	75702465
chr12	76368570	76370905
chr12	76371359	76371707
chr12	78749021	78750155
chr12	79172346	79173080
chr12	80109646	80112986
chr12	80113649	80114407
chr12	80115500	80116128
chr12	80230645	80230859
chr12	80231731	80232016
chr12	80642941	80643715
chr12	80945394	80946675
chr12	83632629	83633299
chr12	83687523	83689471
chr12	83987955	83988214
chr12	84192202	84193917
chr12	84771681	84772125
chr12	84772446	84772846
chr12	84773608	84773831
chr12	85111134	85111600
chr12	85288104	85288324
chr12	85338964	85339434
chr12	85373747	85375381
chr12	85454804	85455100
chr12	85455535	85456253
chr12	85473049	85473323
chr12	85473855	85475105
chr12	85485265	85485857
chr12	85486306	85486532
chr12	85698190	85698451
chr12	86826758	86826989
chr12	87443261	87443685
chr12	91588881	91589174
chr12	91589650	91591461
chr12	99392258	99392589
chr12	102744254	102744840
chr12	105683978	105684983
chr12	105785055	105785388
chr12	108555177	108555466
chr12	108792241	108792721
chr12	108794493	108794739
chr12	108836000	108837199
chr12	109541564	109542108
chr12	109749811	109750575
chr12	110590578	110591584
chr12	110601544	110602907
chr12	110688074	110688615
chr12	110695407	110696336
chr12	111430224	111430495
chr12	111537349	111539346
chr12	111668575	111668831
chr12	111813417	111813809
chr12	111814261	111814617
chr12	112950202	112950513
chr12	118301666	118301917
chr13	3538764	3539021
chr13	5860432	5861163
chr13	5861678	5866691
chr13	6548270	6548902
chr13	8995331	8995898
chr13	9094342	9094694
chr13	12460538	12460920
chr13	12648087	12648431
chr13	13437767	13440014
chr13	13503987	13504179
chr13	14613458	14613730
chr13	17695376	17696272
chr13	17944712	17944873
chr13	21715697	21717182
chr13	21717613	21718553
chr13	21721483	21721749
chr13	21722182	21722570
chr13	21735168	21735536
chr13	21750012	21750405
chr13	22035011	22035613
chr13	22035926	22036316
chr13	22041124	22041447
chr13	22042007	22042862
chr13	22043251	22043692
chr13	23530210	23532285
chr13	23533918	23535006
chr13	23535449	23536264
chr13	23542242	23543424
chr13	23543852	23544118
chr13	23544489	23545272
chr13	23550789	23551046
chr13	23555196	23555418
chr13	23561614	23562408
chr13	23570546	23571052
chr13	23571408	23575368
chr13	23575794	23576844
chr13	23581603	23582298
chr13	23584842	23585953
chr13	23682915	23683887
chr13	23684240	23685568
chr13	23738892	23740130
chr13	23744418	23746465
chr13	23746835	23747512
chr13	23751142	23751935
chr13	23752362	23752688
chr13	23757098	23757320
chr13	23760368	23761145
chr13	23761561	23762322
chr13	24801180	24802718
chr13	24831754	24832031
chr13	28757986	28759005
chr13	28948730	28953615
chr13	29984597	29985531
chr13	31807958	31808178
chr13	34037635	34038028
chr13	34077505	34077945
chr13	37992977	37993214
chr13	38527311	38528391
chr13	43398393	43399099
chr13	45001459	45002022
chr13	46669414	46669867
chr13	46726383	46727798
chr13	48544990	48546434
chr13	48878152	48878707
chr13	51202615	51203117
chr13	51645356	51646210
chr13	51651115	51652118
chr13	52976998	52978407
chr13	52979227	52980645
chr13	52981361	52981822
chr13	54591322	54591571
chr13	54686360	54687679
chr13	54687995	54688618
chr13	55321622	55322209
chr13	55322584	55322630
chr13	55329900	55330212
chr13	55471296	55472706
chr13	55510528	55513463
chr13	55536023	55536492
chr13	55692101	55692334
chr13	55692686	55694295
chr13	58127259	58127506
chr13	58127843	58128250
chr13	58129227	58129448
chr13	58400892	58402620
chr13	59769305	59770768
chr13	59771474	59771488
chr13	60454611	60455436
chr13	64152170	64153033
chr13	64154246	64154643
chr13	64368833	64370407
chr13	69534919	69535152
chr13	74406503	74406683
chr13	74807251	74807264
chr13	75943182	75943518
chr13	80885407	80885897
chr13	81658459	81658618
chr13	81783355	81783575
chr13	86046001	86046437
chr13	87664548	87664829
chr13	89740710	89741140
chr13	90923141	90924251
chr13	91224015	91224992
chr13	94789135	94789428
chr13	95326454	95327625
chr13	95616312	95616950
chr13	97240419	97240772
chr13	98315911	98316792
chr13	98890607	98890840
chr13	98925085	98926364
chr13	100730517	100730877
chr13	100744290	100744579
chr13	103774125	103774492
chr13	103921879	103922088
chr13	106946631	106948243
chr13	107003102	107003313
chr13	107019070	107020484
chr13	107020810	107021905
chr13	107022526	107022913
chr13	109242690	109243473
chr13	110394875	110396661
chr13	111488988	111489273
chr13	112506455	112506832
chr13	112772094	112772802
chr13	119755118	119755977
chr13	119790433	119790702
chr13	119791378	119791598
chr14	7954147	7954384
chr14	8172660	8172880
chr14	14703237	14703525
chr14	16433652	16433747
chr14	18234325	18234579
chr14	18237395	18239008
chr14	18269855	18270999
chr14	20082158	20082616
chr14	20479050	20480184
chr14	20641441	20641810
chr14	20694936	20695612
chr14	20733710	20734619
chr14	21051628	21053293
chr14	21547549	21547802
chr14	21847946	21848834
chr14	24490914	24491783
chr14	25378264	25379470
chr14	25520228	25520456
chr14	25533436	25533573
chr14	26636789	26639536
chr14	26668146	26668703
chr14	26669343	26669638
chr14	26969622	26969864
chr14	27428954	27429338
chr14	29969232	29969435
chr14	30548546	30550688
chr14	31018011	31019036
chr14	31204968	31206201
chr14	31495340	31495614
chr14	31496159	31496587
chr14	32085814	32086519
chr14	33251255	33251625
chr14	34502927	34503921
chr14	37134781	37135085
chr14	45387784	45388723
chr14	46760587	46761214
chr14	46884408	46884745
chr14	47299166	47299487
chr14	47327746	47327948
chr14	47372088	47377230
chr14	52019469	52020726
chr14	52103184	52104013
chr14	52196959	52197861
chr14	54443169	54443414
chr14	54641097	54641723
chr14	54894750	54895320
chr14	55759793	55760061
chr14	56812045	56812821
chr14	57745364	57745641
chr14	57826708	57827079
chr14	57889355	57890293
chr14	60250360	60250799
chr14	61360713	61360897
chr14	61647449	61647669
chr14	61648407	61648687
chr14	61649409	61649607
chr14	61680478	61682351
chr14	62760486	62761151
chr14	63131804	63133475
chr14	63148394	63148609
chr14	63148998	63149210
chr14	67009232	67009392
chr14	67072105	67072346
chr14	67717207	67717496
chr14	70075273	70076606
chr14	70078273	70078676
chr14	70136477	70136811
chr14	74732330	74734231
chr14	75754053	75754575
chr14	75756762	75756968
chr14	75834380	75835247
chr14	75844811	75846242
chr14	76477903	76478047
chr14	76480106	76480536
chr14	76504538	76506715
chr14	89898688	89899074
chr14	99298938	99299228
chr14	103098736	103098974
chr14	105897949	105898177
chr14	115041408	115042938
chr14	120275700	120280192
chr14	120292286	120292524
chr14	120293270	120293499
chr14	120295939	120296220
chr14	120296866	120297650
chr14	120341308	120342333
chr14	120434124	120434454
chr14	121036074	121037326
chr14	121038251	121038520
chr14	121246419	121246617
chr14	121798053	121798602
chr15	3995176	3995660
chr15	5116743	5117990
chr15	6857381	6857516
chr15	6873454	6873735
chr15	8168816	8169633
chr15	8446139	8446565
chr15	10469996	10470279
chr15	10559834	10560843
chr15	11994781	11995874
chr15	12117914	12118294
chr15	12203759	12204354
chr15	12321554	12322061
chr15	12322955	12323255
chr15	25411592	25413087
chr15	25643017	25643142
chr15	25984820	25985040
chr15	27506963	27507193
chr15	27596460	27596727
chr15	27597041	27597221
chr15	27924312	27924559
chr15	28024630	28024918
chr15	31186482	31187085
chr15	31225025	31225679
chr15	31452961	31454118
chr15	31600548	31601666
chr15	32242068	32244179
chr15	34082841	34084020
chr15	34441525	34444323
chr15	35937331	35938071
chr15	36282341	36283050
chr15	36607533	36608970
chr15	36759245	36759690
chr15	36761644	36762936
chr15	36782290	36782531
chr15	36791735	36794469
chr15	37960385	37961597
chr15	38077024	38077217
chr15	38517639	38518086
chr15	38518428	38519215
chr15	38709308	38709514
chr15	44428093	44428827
chr15	50649689	50650237
chr15	51853282	51853892
chr15	53113057	53113242
chr15	53138977	53139217
chr15	53170845	53171092
chr15	53171622	53172032
chr15	53223739	53223942
chr15	53342056	53342204
chr15	53342794	53345884
chr15	55071837	55072190
chr15	56693033	56693351
chr15	58034135	58034373
chr15	58933360	58933613
chr15	59599179	59600082
chr15	59646476	59648167
chr15	59648632	59651376
chr15	61984816	61985065
chr15	61985489	61988012
chr15	61988623	61989538
chr15	61990552	61990742
chr15	62038102	62038962
chr15	62039263	62039669
chr15	62040297	62040548
chr15	62078639	62079773
chr15	62106708	62106979
chr15	62116933	62117199
chr15	62117908	62118737
chr15	62119426	62120355
chr15	62127138	62127352
chr15	62137677	62137713
chr15	62138887	62139991
chr15	62146180	62146401
chr15	62166154	62166389
chr15	62261297	62262033
chr15	62327369	62327951
chr15	62568657	62569429
chr15	64116183	64116471
chr15	64185107	64185285
chr15	64191259	64192130
chr15	64219675	64220104
chr15	64220427	64220705
chr15	64223670	64224874
chr15	64225365	64227814
chr15	64270841	64271098
chr15	64271502	64271767
chr15	64311562	64312538
chr15	64365389	64365675
chr15	64377285	64378852
chr15	64379454	64379786
chr15	64380271	64381367
chr15	64382260	64383441
chr15	66892033	66892280
chr15	66968265	66969629
chr15	67140228	67140465
chr15	67147188	67147532
chr15	67174880	67175540
chr15	67177132	67177682
chr15	73090414	73091414
chr15	75678519	75678782
chr15	75908505	75908791
chr15	76069513	76069854
chr15	76079763	76080914
chr15	76197352	76197641
chr15	76343635	76344025
chr15	76510987	76511924
chr15	76701579	76702100
chr15	76715519	76716419
chr15	76722947	76723784
chr15	76904062	76905474
chr15	77068524	77068976
chr15	77076825	77077299
chr15	77151393	77151943
chr15	77152383	77152652
chr15	77153181	77154474
chr15	77192141	77192398
chr15	77213828	77214152
chr15	77219902	77220187
chr15	77306241	77306865
chr15	77741046	77741295
chr15	77776665	77776895
chr15	77777203	77777650
chr15	77799364	77799786
chr15	77801281	77801555
chr15	77803390	77803610
chr15	77805102	77805312
chr15	77882112	77882818
chr15	78528854	78529089
chr15	78843235	78844514
chr15	78845566	78845923
chr15	78876440	78876989
chr15	78926786	78928122
chr15	78928614	78928877
chr15	79108276	79108579
chr15	79109156	79109684
chr15	79140871	79141171
chr15	79327065	79328128
chr15	79328643	79328863
chr15	79347578	79348657
chr15	79441220	79441513
chr15	79544965	79546150
chr15	79658473	79658703
chr15	79671141	79671361
chr15	80080340	80080683
chr15	80081133	80083535
chr15	80711239	80711630
chr15	81361078	81361306
chr15	81399407	81401065
chr15	81466863	81467395
chr15	81585492	81586458
chr15	81728798	81729810
chr15	81810255	81810875
chr15	81856492	81856658
chr15	81858032	81858370
chr15	81858750	81859613
chr15	82146242	82146697
chr15	82147604	82147908
chr15	82149325	82149676
chr15	83121484	83122806
chr15	83142447	83142937
chr15	83148038	83149720
chr15	83156438	83156862
chr15	83171706	83171984
chr15	85336446	85337290
chr15	85666648	85666894
chr15	85668358	85670745
chr15	85671301	85674469
chr15	85675313	85676016
chr15	85686383	85686950
chr15	85687263	85687661
chr15	89089218	89090587
chr15	89355844	89356097
chr15	89373282	89374248
chr15	93275541	93276242
chr15	95823735	95824205
chr15	96284705	96285218
chr15	96285965	96286481
chr15	96288488	96288761
chr15	96641252	96642281
chr15	96696301	96699933
chr15	96710062	96710971
chr15	97784385	97788232
chr15	98532465	98534333
chr15	98540597	98540746
chr15	98567320	98567573
chr15	98567968	98569336
chr15	98727303	98728134
chr15	98830873	98831600
chr15	98916777	98916966
chr15	98917272	98918065
chr15	98933444	98934465
chr15	98952782	98953579
chr15	99030227	99034163
chr15	99393640	99393987
chr15	99725789	99726440
chr15	99772272	99772415
chr15	99803728	99804306
chr15	99816937	99820024
chr15	99972906	99973922
chr15	100226735	100227740
chr15	100228307	100228690
chr15	100237327	100237521
chr15	100494983	100495269
chr15	101266824	101267995
chr15	102073986	102075726
chr15	102099172	102100245
chr15	102230144	102232800
chr15	102243217	102244410
chr15	102245391	102246039
chr15	102404624	102405162
chr15	102459472	102459874
chr15	102460484	102460887
chr15	102470768	102471171
chr15	102517127	102517831
chr15	102518284	102519868
chr15	102625671	102626001
chr15	102670480	102670947
chr15	102671765	102673453
chr15	103215323	103215771
chr15	103239874	103241862
chr16	4076861	4078320
chr16	4212888	4213299
chr16	4558138	4558750
chr16	4559147	4559557
chr16	4624289	4624924
chr16	4625234	4625392
chr16	4640004	4644184
chr16	4644728	4644968
chr16	4645631	4645851
chr16	4646201	4646421
chr16	4646812	4648376
chr16	4651276	4652226
chr16	4656216	4656268
chr16	4789205	4789499
chr16	4878457	4880099
chr16	4880776	4881596
chr16	4939104	4939804
chr16	5013034	5013507
chr16	5233839	5234403
chr16	8667511	8667781
chr16	8670582	8670775
chr16	8737719	8738299
chr16	8829218	8829547
chr16	8830155	8831406
chr16	8850403	8850917
chr16	8862668	8862913
chr16	11066483	11067337
chr16	11134188	11134416
chr16	11202365	11202539
chr16	11202989	11203233
chr16	11455765	11456160
chr16	13667444	13668351
chr16	13671986	13672594
chr16	13818803	13820077
chr16	13902377	13902934
chr16	14351594	14353198
chr16	14361698	14363146
chr16	14450321	14450509
chr16	15636573	15636796
chr16	15886860	15888823
chr16	15889542	15890399
chr16	16303319	16303539
chr16	17646566	17646936
chr16	17721886	17722210
chr16	17722519	17722837
chr16	17797363	17797864
chr16	17798209	17798561
chr16	18234401	18234735
chr16	18235174	18236771
chr16	18247127	18250217
chr16	18288106	18289034
chr16	18416519	18416814
chr16	18836564	18836925
chr16	20097497	20098572
chr16	20516590	20517167
chr16	20517764	20518009
chr16	20535624	20536203
chr16	20536570	20537033
chr16	20547716	20549021
chr16	20610541	20610807
chr16	20620862	20621186
chr16	20621581	20622366
chr16	20651843	20652316
chr16	20673271	20673888
chr16	22067115	22067461
chr16	22152965	22153187
chr16	22264293	22265998
chr16	23107557	23109352
chr16	23109990	23110254
chr16	24394308	24394547
chr16	24395214	24395648
chr16	24490413	24490771
chr16	24498703	24498810
chr16	27389236	27389965
chr16	29813556	29813786
chr16	30511193	30511475
chr16	31274929	31275177
chr16	31948954	31949191
chr16	32002018	32003387
chr16	32078113	32078999
chr16	32395339	32396348
chr16	32420405	32420674
chr16	32659489	32659643
chr16	33056447	33057645
chr16	33062358	33063559
chr16	33777466	33777734
chr16	35983295	35983602
chr16	36041250	36041603
chr16	36041909	36041975
chr16	36071780	36072340
chr16	36873882	36874285
chr16	37777684	37779152
chr16	37800847	37801093
chr16	37815061	37815366
chr16	38087209	38088789
chr16	38089512	38089860
chr16	38563571	38563804
chr16	43363381	43364126
chr16	44138233	44140534
chr16	45742376	45742923
chr16	48992814	48993872
chr16	55820488	55820973
chr16	55966394	55967637
chr16	55973362	55975768
chr16	57167036	57167331
chr16	57527336	57527798
chr16	57549313	57550714
chr16	70313848	70314686
chr16	85800934	85801690
chr16	85802314	85803086
chr16	85899990	85900222
chr16	87494697	87495124
chr16	87698990	87700505
chr16	90220854	90221979
chr16	91406166	91406647
chr16	91646915	91647636
chr16	91648179	91648771
chr16	91688224	91688676
chr16	92058379	92058613
chr16	92399513	92399920
chr16	92608426	92608756
chr16	92621490	92621772
chr16	92622097	92622311
chr16	92696838	92697181
chr16	94570732	94571500
chr16	95990397	95990909
chr16	96126926	96127364
chr16	97961010	97962469
chr17	3115197	3115884
chr17	4997147	4997373
chr17	5189250	5189781
chr17	6107266	6107512
chr17	6108281	6108543
chr17	6827070	6827282
chr17	10316567	10316800
chr17	10317985	10318564
chr17	10319515	10320440
chr17	12119651	12119975
chr17	12916495	12917220
chr17	12939460	12939581
chr17	12940085	12941078
chr17	12991032	12991098
chr17	13682690	13683455
chr17	14943291	14943561
chr17	14943972	14944036
chr17	15526805	15527138
chr17	15704406	15704684
chr17	15705976	15706341
chr17	17345951	17346128
chr17	17375105	17375655
chr17	17825787	17826957
chr17	17836999	17838237
chr17	17838703	17839584
chr17	17840346	17840613
chr17	17845005	17845536
chr17	17845839	17846083
chr17	20945815	20946551
chr17	21476884	21477279
chr17	21478146	21478953
chr17	21536944	21537473
chr17	21567125	21567345
chr17	21567950	21568189
chr17	23673489	23677542
chr17	23771332	23771587
chr17	23803483	23804943
chr17	23828031	23829646
chr17	24072412	24073502
chr17	24163460	24163651
chr17	24168280	24169308
chr17	24219941	24221251
chr17	24414860	24416491
chr17	24426635	24427595
chr17	24454437	24455254
chr17	24470595	24471216
chr17	24526956	24527223
chr17	24528220	24530252
chr17	24550134	24550908
chr17	24695335	24695916
chr17	24696325	24696696
chr17	24719093	24721016
chr17	24723715	24724035
chr17	24885963	24886315
chr17	24886723	24887659
chr17	24894601	24895819
chr17	24935548	24935636
chr17	24936491	24937117
chr17	24960076	24960662
chr17	25133977	25134091
chr17	25239823	25240618
chr17	25271935	25274067
chr17	25831916	25832157
chr17	25833103	25834376
chr17	25875147	25876124
chr17	25984555	25985767
chr17	26137967	26138236
chr17	26243621	26243976
chr17	26244458	26245116
chr17	26506980	26509832
chr17	26592874	26593211
chr17	26676470	26677364
chr17	26715653	26716963
chr17	26781061	26781356
chr17	26933361	26933655
chr17	26972510	26972989
chr17	27039248	27039478
chr17	27131070	27131283
chr17	27202690	27202952
chr17	27554918	27556537
chr17	27564763	27566293
chr17	27623184	27623784
chr17	27633545	27635239
chr17	27765386	27765614
chr17	27766779	27767102
chr17	27856493	27857525
chr17	27906889	27907513
chr17	27908146	27908400
chr17	28235733	28236235
chr17	28327479	28327860
chr17	28328410	28331284
chr17	28340957	28341177
chr17	28621234	28622396
chr17	28953316	28953836
chr17	29031338	29031561
chr17	29032596	29034379
chr17	29093833	29096104
chr17	29269090	29269517
chr17	29346602	29347251
chr17	29489293	29490309
chr17	29491948	29492230
chr17	30003749	30004175
chr17	30075952	30076172
chr17	31511886	31512137
chr17	31854936	31855576
chr17	32064177	32065378
chr17	32206724	32206916
chr17	32283104	32284756
chr17	32320121	32321212
chr17	32321892	32322131
chr17	32349449	32351104
chr17	33629160	33630070
chr17	33684315	33685432
chr17	33759141	33760326
chr17	33823213	33824522
chr17	33920546	33920611
chr17	33929502	33929765
chr17	33951136	33951867
chr17	33953970	33955637
chr17	34024688	34024934
chr17	34027206	34028033
chr17	34030174	34032231
chr17	34033522	34033691
chr17	34117954	34118200
chr17	34118596	34123013
chr17	34604487	34605093
chr17	34950398	34952556
chr17	34982007	34982309
chr17	34999801	35000327
chr17	35000674	35001924
chr17	35051650	35052064
chr17	35059050	35059828
chr17	35135116	35136718
chr17	35162627	35164788
chr17	35240749	35243612
chr17	35263213	35263651
chr17	35821678	35823088
chr17	35823398	35823621
chr17	35836583	35838257
chr17	35896675	35897219
chr17	35916561	35919612
chr17	35994161	35994413
chr17	36271123	36272409
chr17	37061861	37062081
chr17	44710318	44710715
chr17	45401365	45401595
chr17	45563895	45564942
chr17	45572101	45573405
chr17	46202967	46203210
chr17	46246679	46246943
chr17	46247265	46249129
chr17	46555892	46556115
chr17	46680061	46680319
chr17	46681506	46681799
chr17	46772062	46772440
chr17	46772881	46773511
chr17	46854888	46857762
chr17	46858561	46859418
chr17	46889689	46890315
chr17	46994854	46995160
chr17	47501491	47501892
chr17	47595321	47595563
chr17	47596441	47596567
chr17	47628614	47629438
chr17	47629894	47630818
chr17	47687049	47688057
chr17	48408191	48409535
chr17	51178679	51179140
chr17	53479367	53480301
chr17	56026086	56026285
chr17	56073967	56075379
chr17	56183327	56183956
chr17	56256101	56256468
chr17	56303743	56304504
chr17	56325251	56325539
chr17	56326125	56326421
chr17	56608598	56609696
chr17	56613374	56614663
chr17	56765423	56765536
chr17	57030094	57030759
chr17	63660814	63661662
chr17	63711530	63712866
chr17	63863316	63863670
chr17	63864072	63864292
chr17	63949264	63949631
chr17	64727400	64727572
chr17	65612350	65612882
chr17	65613194	65613467
chr17	65950546	65951085
chr17	68003200	68003459
chr17	69156936	69159237
chr17	69181817	69182100
chr17	69255672	69256325
chr17	69256638	69256940
chr17	69416420	69416723
chr17	70747089	70749127
chr17	70836469	70836834
chr17	70846375	70846583
chr17	70847675	70853491
chr17	70854001	70854146
chr17	70990162	70990926
chr17	70999570	71001022
chr17	71001545	71001846
chr17	71257053	71257308
chr17	71474149	71474633
chr17	71475047	71475297
chr17	71616745	71617423
chr17	71617964	71618254
chr17	72836734	72836984
chr17	72838151	72838381
chr17	72839319	72839470
chr17	72918267	72919518
chr17	73252694	73252924
chr17	73942428	73943047
chr17	73947285	73950146
chr17	74526659	74527957
chr17	74528716	74529169
chr17	79894614	79895499
chr17	80206105	80207346
chr17	80256018	80256057
chr17	82376918	82377283
chr17	82377928	82378547
chr17	83351736	83351968
chr17	83513944	83514173
chr17	84182087	84183918
chr17	84184772	84189452
chr17	86962673	86963002
chr17	86963560	86965173
chr17	87445794	87446842
chr17	87613995	87614048
chr17	87975159	87976008
chr17	88063648	88064809
chr17	88440984	88442171
chr17	88626237	88626740
chr18	6193170	6193271
chr18	6488990	6489221
chr18	6489664	6490785
chr18	6516315	6516602
chr18	7869850	7870083
chr18	10028834	10029796
chr18	12972161	12974762
chr18	31910969	31911581
chr18	32163132	32163461
chr18	33794879	33796000
chr18	33889723	33891453
chr18	34330485	34331367
chr18	34505481	34508151
chr18	34625072	34625505
chr18	34759545	34759923
chr18	34760330	34760512
chr18	34860100	34860419
chr18	34861065	34863085
chr18	34887599	34887823
chr18	34930639	34931850
chr18	34932241	34933495
chr18	34952183	34955819
chr18	35118996	35119901
chr18	35553462	35554910
chr18	35555295	35555611
chr18	35561631	35563857
chr18	35598593	35599656
chr18	35661716	35662057
chr18	35772052	35772801
chr18	35873415	35873916
chr18	36514277	36514434
chr18	36669562	36671038
chr18	36678377	36679061
chr18	37835467	37835715
chr18	37934773	37935319
chr18	46524009	46525737
chr18	46597731	46599421
chr18	52524247	52524325
chr18	52524887	52525089
chr18	52526276	52528506
chr18	53861165	53861942
chr18	56708550	56708770
chr18	60560357	60561344
chr18	60774781	60776319
chr18	60992739	60993132
chr18	61555398	61557462
chr18	61571760	61571978
chr18	61638298	61639135
chr18	61639450	61641935
chr18	61644052	61644344
chr18	61664580	61665463
chr18	62547976	62548544
chr18	63691771	63692163
chr18	64515774	64516448
chr18	67205777	67206146
chr18	67390715	67391386
chr18	67775041	67775571
chr18	67775945	67776294
chr18	68299819	68301316
chr18	73573607	73574434
chr18	75000552	75001633
chr18	75005300	75006203
chr18	75377227	75377583
chr18	75385052	75385135
chr18	75387553	75388118
chr18	80149933	80150981
chr18	80656557	80656784
chr18	80932835	80933133
chr18	82914992	82915232
chr19	3283304	3283531
chr19	3574801	3575680
chr19	3708728	3709223
chr19	3768205	3768447
chr19	3851015	3851426
chr19	3851785	3852910
chr19	4037322	4037627
chr19	4099360	4099645
chr19	4112845	4113020
chr19	4113380	4113632
chr19	4126131	4126383
chr19	4192261	4193164
chr19	4200493	4201533
chr19	4213072	4213396
chr19	4214338	4214707
chr19	4283823	4283923
chr19	4305654	4305963
chr19	4332664	4334573
chr19	4615182	4615715
chr19	4624915	4625215
chr19	4625781	4626142
chr19	4626766	4626787
chr19	4755796	4757389
chr19	4793471	4794897
chr19	4810461	4811580
chr19	5049594	5050158
chr19	5050835	5052431
chr19	5053762	5054381
chr19	5061198	5061370
chr19	5098229	5098474
chr19	5106232	5106522
chr19	5272536	5273619
chr19	5365980	5366206
chr19	5447831	5450640
chr19	5456169	5457873
chr19	5459202	5459443
chr19	5460130	5460975
chr19	5487326	5489573
chr19	5490456	5492097
chr19	5601862	5603010
chr19	5610527	5610829
chr19	5662711	5663610
chr19	5725472	5725750
chr19	5729262	5729552
chr19	5770352	5770946
chr19	5794948	5795675
chr19	5796077	5805173
chr19	5808827	5816706
chr19	5817292	5818545
chr19	5840184	5850839
chr19	5851626	5851698
chr19	5893947	5894142
chr19	5912279	5913970
chr19	5945733	5946012
chr19	6046568	6047947
chr19	6058005	6059026
chr19	6060687	6062093
chr19	6118704	6119028
chr19	6140950	6141437
chr19	6276941	6279167
chr19	6296266	6296486
chr19	6297406	6297765
chr19	6363790	6365059
chr19	6907972	6908630
chr19	6909752	6910819
chr19	6951279	6951503
chr19	6974412	6974707
chr19	6975821	6976112
chr19	6979252	6979850
chr19	6980741	6981447
chr19	7205201	7205415
chr19	7217246	7217466
chr19	7381969	7382968
chr19	7424982	7425354
chr19	7425688	7425938
chr19	7494557	7495198
chr19	7495524	7495752
chr19	8702678	8702941
chr19	8709791	8710543
chr19	8711680	8713887
chr19	8723487	8725787
chr19	8741887	8742964
chr19	8756082	8757709
chr19	8773308	8775109
chr19	8887625	8888809
chr19	8942033	8942913
chr19	8952800	8954118
chr19	8966111	8966699
chr19	8967255	8968967
chr19	8980564	8985770
chr19	8988377	8990055
chr19	8990430	8992663
chr19	8993153	8993333
chr19	9982685	9984216
chr19	10056412	10057048
chr19	10183101	10183508
chr19	10203202	10203529
chr19	10204095	10205073
chr19	10525448	10526155
chr19	10605523	10606878
chr19	10689287	10690457
chr19	10895380	10896474
chr19	11770431	11771057
chr19	11817579	11817784
chr19	11911283	11912006
chr19	12010478	12011481
chr19	12794733	12795115
chr19	12795689	12796994
chr19	14597180	14597449
chr19	15923046	15925595
chr19	20389120	20390716
chr19	21272255	21273687
chr19	21274075	21275168
chr19	22916510	22916970
chr19	23133936	23137090
chr19	23139973	23140588
chr19	23141208	23143941
chr19	28010180	28012626
chr19	28679013	28679233
[truncated: 2,037 more rows]
